# Supplementary material for: Postnatal maternal depressive symptoms and behavioural outcomes in term-born and preterm-born toddlers: a longitudinal UK community cohort study
Source: PubMed Central journal article supplement (PMC9438072; doi:10.1136/bmjopen-2021-058540), 2022-09-01
Supplement: bmjopen-2021-058540.draft_revisions.pdf [file bmjopen-2021-058540.draft_revisions.pdf]

# BMJ Open

BMJ Open is committed to open peer review. As part of this commitment we make the peer review history of every article we publish publicly available.

When an article is published we post the peer reviewers' comments and the authors' responses online. We also post the versions of the paper that were used during peer review. These are the versions that the peer review comments apply to.

The versions of the paper that follow are the versions that were submitted during the peer review process. They are not the versions of record or the final published versions. They should not be cited or distributed as the published version of this manuscript.

BMJ Open is an open access journal and the full, final, typeset and author-corrected version of record of the manuscript is available on our site with no access controls, subscription charges or pay-per-view fees (<http://bmjopen.bmj.com>).

If you have any questions on BMJ Open's open peer review process please email [info.bmjopen@bmj.com](mailto:info.bmjopen@bmj.com)

# BMJ Open

## Postnatal maternal depressive symptoms and behavioural outcomes in term- and preterm-born toddlers

|                               |                                                                                                                                                                                                                                                                                                                                                                                                                                                                                                                                                                                                                                                                                                                                                                                                                                                                                                                                                                                                                                                                                                                                                                                                                                                                                                                                                                                                                                                                                                                                                                                                                                                                                                                                                                                      |
|-------------------------------|--------------------------------------------------------------------------------------------------------------------------------------------------------------------------------------------------------------------------------------------------------------------------------------------------------------------------------------------------------------------------------------------------------------------------------------------------------------------------------------------------------------------------------------------------------------------------------------------------------------------------------------------------------------------------------------------------------------------------------------------------------------------------------------------------------------------------------------------------------------------------------------------------------------------------------------------------------------------------------------------------------------------------------------------------------------------------------------------------------------------------------------------------------------------------------------------------------------------------------------------------------------------------------------------------------------------------------------------------------------------------------------------------------------------------------------------------------------------------------------------------------------------------------------------------------------------------------------------------------------------------------------------------------------------------------------------------------------------------------------------------------------------------------------|
| Journal:                      | <i>BMJ Open</i>                                                                                                                                                                                                                                                                                                                                                                                                                                                                                                                                                                                                                                                                                                                                                                                                                                                                                                                                                                                                                                                                                                                                                                                                                                                                                                                                                                                                                                                                                                                                                                                                                                                                                                                                                                      |
| Manuscript ID                 | bmjopen-2021-058540                                                                                                                                                                                                                                                                                                                                                                                                                                                                                                                                                                                                                                                                                                                                                                                                                                                                                                                                                                                                                                                                                                                                                                                                                                                                                                                                                                                                                                                                                                                                                                                                                                                                                                                                                                  |
| Article Type:                 | Original research                                                                                                                                                                                                                                                                                                                                                                                                                                                                                                                                                                                                                                                                                                                                                                                                                                                                                                                                                                                                                                                                                                                                                                                                                                                                                                                                                                                                                                                                                                                                                                                                                                                                                                                                                                    |
| Date Submitted by the Author: | 20-Oct-2021                                                                                                                                                                                                                                                                                                                                                                                                                                                                                                                                                                                                                                                                                                                                                                                                                                                                                                                                                                                                                                                                                                                                                                                                                                                                                                                                                                                                                                                                                                                                                                                                                                                                                                                                                                          |
| Complete List of Authors:     | <p>Kleine, Ira; King's College London, Centre for the Developing Brain, School of Bioengineering and Imaging Sciences, Faculty of Life Sciences &amp; Medicine</p> <p>Vamvakas, George; King's College London, Department of Biostatistics and Health Informatics, Institute of Psychiatry, Psychology and Neuroscience</p> <p>Lautarescu, Alexandra; King's College London, Centre for the Developing Brain, School of Bioengineering and Imaging Sciences, Faculty of Life Sciences &amp; Medicine; King's College London, Forensic and Neurodevelopmental Sciences, Institute of Psychiatry, Psychology and Neuroscience</p> <p>Falconer, Shona; King's College London, Centre for the Developing Brain, School of Bioengineering and Imaging Sciences, Faculty of Life Sciences &amp; Medicine</p> <p>Chew, Andrew; King's College London, Centre for the Developing Brain, School of Bioengineering and Imaging Sciences, Faculty of Life Sciences &amp; Medicine</p> <p>Counsell, Serena ; King's College London, Centre for the Developing Brain, School of Bioengineering and Imaging Sciences, Faculty of Life Sciences &amp; Medicine</p> <p>Pickles, Andrew; King's College London, Department of Biostatistics and Health Informatics, Institute of Psychiatry, Psychology and Neuroscience</p> <p>Edwards, David; King's College London, Centre for the Developing Brain, School of Bioengineering and Imaging Sciences, Faculty of Life Sciences &amp; Medicine</p> <p>Nosarti, Chiara; King's College London, Centre for the Developing Brain, School of Bioengineering and Imaging Sciences, Faculty of Life Sciences &amp; Medicine; King's College London, Department of Child and Adolescent Psychiatry, Institute of Psychiatry, Psychology and Neuroscience</p> |
| Keywords:                     | MENTAL HEALTH, Child & adolescent psychiatry < PSYCHIATRY, Developmental neurology & neurodisability < PAEDIATRICS, Depression & mood disorders < PSYCHIATRY                                                                                                                                                                                                                                                                                                                                                                                                                                                                                                                                                                                                                                                                                                                                                                                                                                                                                                                                                                                                                                                                                                                                                                                                                                                                                                                                                                                                                                                                                                                                                                                                                         |
|                               |                                                                                                                                                                                                                                                                                                                                                                                                                                                                                                                                                                                                                                                                                                                                                                                                                                                                                                                                                                                                                                                                                                                                                                                                                                                                                                                                                                                                                                                                                                                                                                                                                                                                                                                                                                                      |

SCHOLARONE™  
Manuscripts

1  
2  
3  
4  
5  
6  
7  
8  
9  
10  
11  
12  
13  
14  
15  
16  
17  
18  
19  
20  
21  
22  
23  
24  
25  
26  
27  
28  
29  
30  
31  
32  
33  
34  
35  
36  
37  
38  
39  
40  
41  
42  
43  
44  
45  
46  
47  
48  
49  
50  
51  
52  
53  
54  
55  
56  
57  
58  
59  
60

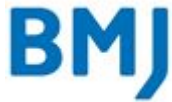

I, the Submitting Author has the right to grant and does grant on behalf of all authors of the Work (as defined in the below author licence), an exclusive licence and/or a non-exclusive licence for contributions from authors who are: i) UK Crown employees; ii) where BMJ has agreed a CC-BY licence shall apply, and/or iii) in accordance with the terms applicable for US Federal Government officers or employees acting as part of their official duties; on a worldwide, perpetual, irrevocable, royalty-free basis to BMJ Publishing Group Ltd ("BMJ") its licensees and where the relevant Journal is co-owned by BMJ to the co-owners of the Journal, to publish the Work in this journal and any other BMJ products and to exploit all rights, as set out in our [licence](#).

The Submitting Author accepts and understands that any supply made under these terms is made by BMJ to the Submitting Author unless you are acting as an employee on behalf of your employer or a postgraduate student of an affiliated institution which is paying any applicable article publishing charge ("APC") for Open Access articles. Where the Submitting Author wishes to make the Work available on an Open Access basis (and intends to pay the relevant APC), the terms of reuse of such Open Access shall be governed by a Creative Commons licence – details of these licences and which [Creative Commons](#) licence will apply to this Work are set out in our licence referred to above.

Other than as permitted in any relevant BMJ Author's Self Archiving Policies, I confirm this Work has not been accepted for publication elsewhere, is not being considered for publication elsewhere and does not duplicate material already published. I confirm all authors consent to publication of this Work and authorise the granting of this licence.

1  
2  
3 **Postnatal maternal depressive symptoms and behavioural outcomes in term- and**  
4 **preterm-born toddlers**  
5  
6  
7

8 Kleine, I<sup>a</sup> (MBBS); Vamvakas, G<sup>b</sup> (MSc); Lautarescu A<sup>a,c</sup> (MPhil); Falconer, S<sup>a</sup> (PhD); Chew  
9 A<sup>a</sup> (MD); Counsell SJ<sup>a</sup> (PhD); Pickles, A<sup>b</sup> (FMedSci); Edwards, AD<sup>a</sup> (FMedSci); Nosarti, C<sup>a,d</sup>  
10 (PhD).  
11  
12  
13  
14

15 <sup>a</sup> Centre for the Developing Brain, School of Bioengineering and Imaging Sciences, Faculty  
16 of Life Sciences & Medicine, King's College London, St Thomas' Hospital, London SE1  
17 7EH, UK.  
18  
19

20 <sup>b</sup> Department of Biostatistics and Health Informatics, Institute of Psychiatry, Psychology and  
21 Neuroscience, King's College London, London SE5 8AF, UK.  
22  
23

24 <sup>c</sup> Forensic and Neurodevelopmental Sciences, Institute of Psychiatry, Psychology and  
25 Neuroscience, King's College London, London SE5 8AF, UK.  
26

27 <sup>d</sup> Department of Child and Adolescent Psychiatry, Institute of Psychiatry, Psychology and  
28 Neuroscience, King's College London, London SE5 8AF, UK.  
29  
30  
31

32 **Post-publication corresponding author's contact information**  
33

34 Prof Chiara Nosarti

35 Centre for the Developing Brain, School of Bioengineering and Imaging Sciences

36 King's College London

37 St Thomas' Hospital

38 London

39 SE1 7EH

40 UK

41 chiara.nosarti@kcl.ac.uk

42 +44 (0)207 848 0133  
43  
44  
45  
46  
47  
48  
49  
50  
51  
52  
53  
54  
55  
56  
57  
58  
59  
60

## **Abstract**

**Objectives:** To examine the association between maternal depressive symptoms in the immediate postnatal period and offspring's mental health in a large cohort of term- and preterm-born toddlers.

**Design and Participants:** Data were drawn from the Developing Human Connectome Project. Maternal postnatal depressive symptoms were assessed at term, and children's outcomes were evaluated at a median corrected age of 18.4 months (range 17.3 – 24.3).

**Exposure and outcomes:** Preterm birth was defined as <37 weeks completed gestation. Maternal depressive symptoms were assessed with the Edinburgh Postnatal Depression Scale (EPDS). Toddlers' outcome measures were parent-rated Child Behaviour Checklist 1<sup>1/2</sup>-5 Total (CBCL) and Quantitative Checklist for Autism in Toddlers (Q-CHAT) scores. Toddlers' cognition was assessed with the Bayley Scales of Infant and Toddler Development – Third Edition (Bayley-III).

**Results:** Higher maternal EPDS scores were associated with toddlers' higher CBCL ( $B=0.93$ , 95% CI 0.43-1.44,  $p<0.001$ ,  $f^2=0.05$ ) and Q-CHAT scores ( $B=0.27$ , 95% CI 0.03-0.52,  $p=.031$ ,  $f^2=0.01$ ). Higher maternal EPDS scores were not associated with toddlers' cognitive outcomes. Maternal EPDS, toddlers' CBCL and Q-CHAT scores did not differ between preterm ( $n=97$ ; 19.1% of the total sample) and term participants.

**Conclusions:** Our findings indicate that children whose mothers had increased depressive symptoms in the early postnatal period, including subclinical symptoms, exhibit more maternally-reported behavioural problems in toddlerhood. These associations were independent of gestational age. Further research is needed to confirm the clinical significance of these findings.

### **Strengths and limitations of this study**

- Prospective study with a large sample, using multiple imputation to reduce non-response bias.
- Maternal depressive symptoms assessed as a continuous variable, providing more nuanced information about the significance of subclinical symptoms.
- Maternal depressive symptoms assessed earlier than in previous studies, enabling recognition of early screening opportunities for families.
- Potential shared method variance bias through parent-completed child behavioural assessments.
- Unknown paternal and parental factors, such as comorbid psychiatric conditions, that may confound our findings.

### **Keywords**

Postpartum Depression; Child Development; Autism; Mental Health; Child Behavior; Mood Disorder.

### **Declarations**

#### **Funding**

The DHCP project was funded by the European Research Council under the European Union Seventh Framework Programme (FR/2007-2013)/ERC Grant Agreement no. 319456. The authors acknowledge infrastructure support from the National Institute for Health Research Mental Health Biomedical Research Centre at South London, Maudsley NHS Foundation Trust, King's College London, the National Institute for Health Research Mental Health Biomedical Research Centre at Guys, and St Thomas' Hospitals NHS Foundation Trust. The study was also supported in part by the Engineering and Physical Sciences Research Council / Wellcome Trust Centre for Medical Engineering at King's College London (grant WT 203148/Z/16/Z) and the Medical Research Council (UK) (grants MR/K006355/1 and MR/L011530/1) and the MRC Centre for Neurodevelopmental Disorders at King's College London. AP receives a NIHR SI award (NF-SI-0617-10120). AL is supported by the UK Medical Research Council (MR/N013700) and King's College London member of the MRC Doctoral Training Partnership in Biomedical Sciences. The views expressed are those of the authors and not necessarily those of the NHS, the NIHR, or the Department of Health and Social Care.

### **Conflict of interest / Competing interests**

ADE received financial support from the EU-AIMS-Trials (European Research Council under the European Union Seventh Framework Programme) as co-Principal Investigator.

ADE received consulting fees from Chiesi Farmaceutici (advice on neuroprotection in newborn infants) and Medtronix (unpaid participation in scientific advice committee). ADE has a patent on Xenon as an organ protectant (No P023708WO). ADE was Chair of the Data Monitoring and Ethics Committee for the Baby-Oscar Trial, and served on the Data Monitoring and Ethics Committee for the PAEN Trial.

There are no other relationships or activities that could appear to have influenced the submitted work.

### **Availability of data and material**

Research data will be available as part of Developing Human Connectome Project (<http://www.developingconnectome.org/>).

### **Code availability**

Not applicable.

### **Ethics approval**

This study was approved by the UK National Research Ethics Authority (14/LO/1169) and conducted in accordance with the World Medical Association's Code of Ethics (Declaration of Helsinki).

### **Consent to participate**

Written informed consent was given by children's carer(s) at recruitment into the study.

### **Consent for publication**

Not applicable.

### **Patient and Public Involvement statement**

The current study was developed in consultation with the Weston Programme for Family Centered Research, which involves parents to define what research is valuable to them, and to allow them to lead it with support from the scientists in the Centre for the Developing Brain.



## **Introduction**

Postnatal depression affects approximately 12% of mothers worldwide.<sup>1</sup> In contrast to ‘baby blues’, which is a state of emotional lability that affects between 30-80% of women in the first few days after birth and typically resolves spontaneously within two weeks,<sup>2</sup> postnatal depression is more severe and starts in the first few months post-partum<sup>1</sup>. Stressful life events have been linked to a heightened risk of developing postnatal depression,<sup>3</sup> with rates as high as 40% in women who give birth before term completion (i.e., preterm, < 37 gestational weeks),<sup>4</sup> likely due to heightened stress associated with perinatal complications.<sup>5</sup>

Women with postnatal depression tend to be less responsive to their baby’s needs and to display less affection.<sup>6</sup> Therefore, in the short-term postpartum depression may affect mother-infant interactions<sup>7</sup> and in the long-term it may lead to alterations in brain development,<sup>8</sup> emotional difficulties,<sup>9</sup> less secure attachment, cognitive and behavioural problems in childhood, and a possible increased risk of autism spectrum disorder (ASD).<sup>10,11</sup> Large cohort studies, such as the Avon Longitudinal Study of Parents and Children (ALSPAC), have shown that these associations are even evident when maternal depression is measured on a continuum of symptoms rather than a dichotomous diagnosis,<sup>12-14</sup> supporting the notion that elevated sub-diagnostic psychiatric symptoms can also negatively impact on children’s development.<sup>15</sup>

Studies investigating the underlying causes that may link maternal postnatal depression to child outcomes have implicated several biological and environmental variables. For instance, genetic and epigenetic factors have been shown to both mediate and mitigate the intergenerational transmission of psychiatric disorders,<sup>16</sup> while lower quality parenting, interparental conflict, and socioeconomic deprivation have been shown to exacerbate children’s developmental risk.<sup>11</sup> In addition, preterm birth has been associated with alterations in early brain development,<sup>17</sup> as well as neurological, behavioural and cognitive problems in childhood and beyond.<sup>18,19</sup> Therefore, it is complex to disentangle the possible effects of postnatal maternal mental health and those of perinatal clinical factors on specific outcomes in preterm children, as these may involve both maternal psychosocial and biological variables and child preterm-related neurodevelopmental morbidity. Furthermore, a question that remains unanswered is whether perinatal clinical risk accentuates the association between maternal postnatal depressive symptoms and child outcome. Previous research has proposed a diathesis-stress model, whereby preterm birth is regarded as a

1  
2  
3 vulnerability factor that makes preterm infants more prone to suboptimal environmental  
4 influences compared to term infants.<sup>20,21</sup> On the other hand, the differential susceptibility  
5 model frames preterm birth as a plasticity factor that makes infants more likely to have both  
6 poorer outcomes in negative environments, as well as better outcomes in supportive  
7 environments.<sup>21,22</sup>  
8  
9  
10  
11  
12

13 Given that mothers of preterm children experience elevated levels of distress,<sup>23</sup> are at high  
14 risk of developing postnatal depression,<sup>4</sup> and that preterm children themselves are vulnerable  
15 to psychiatric sequelae,<sup>24</sup> we aimed to investigate the association between very early  
16 symptoms of maternal postnatal depression and child behavioural and emotional outcomes, as  
17 well as whether this association was influenced by gestational age. We hypothesise that early  
18 postnatal maternal depressive symptoms would be more elevated in mothers of preterm  
19 compared to term infants and that these would impact preterm children's behavioural and  
20 emotional outcomes to a greater degree than their term counterparts.  
21  
22  
23  
24  
25  
26  
27  
28

## 29 **Methods**

### 30 **Sample**

31 Participants were enrolled in the Developing Human Connectome Project (DHCP,  
32 <http://www.developingconnectome.org/>). Toddlers were invited to the Centre for the  
33 Developing Brain, St Thomas' Hospital, London, for neurodevelopmental assessment  
34 between 17 and 24 months post-expected delivery date. Inclusion criteria for our follow-up  
35 study were: mother and baby attendance for magnetic resonance imaging (MRI) at term  
36 corrected age; completed toddler neurodevelopmental assessment. 509 toddlers met these  
37 inclusion criteria by the date of closure for this analysis (26/02/2020). This study was  
38 approved by the UK National Research Ethics Authority (14/LO/1169) and conducted in  
39 accordance with the World Medical Association's Code of Ethics (Declaration of Helsinki).  
40 Written informed consent was given by children's carer(s) at recruitment into the study.  
41  
42  
43  
44  
45  
46  
47  
48  
49  
50

### 51 **Maternal variables**

52 Maternal age, parity, Body Mass Index (BMI) and postcode were collected at enrolment into  
53 the DHCP study. Parity was coded as 0, 1, 2, or  $\geq 3$  previous children. Index of Multiple  
54 Deprivation (IMD) rank was computed from the current maternal postcode using the 2019  
55 IMD classification,<sup>25</sup> and provided a proxy for family socioeconomic status. Lower IMD rank  
56 corresponds to greater social deprivation.  
57  
58  
59  
60

1  
2  
3  
4  
5 *Maternal depressive symptoms* were measured using the Edinburgh Postnatal Depression  
6 Scale (EPDS)<sup>26</sup> at term corrected age. The EPDS is a 10-item screening questionnaire  
7 completed by mothers, with higher scores reflecting a higher likelihood of depressive  
8 disorders. A score of 13 can be used as a cut-off indicating high-level symptoms, although a  
9 cut-off of 11 maximises the sensitivity and specificity of the screening tool for depression.<sup>27</sup>

#### 15 Child variables

16 Infant *clinical characteristics* included: sex, gestational age at birth, birth weight, and  
17 pregnancy size (singleton/twin/triplet).

21  
22 *Behavioural outcomes* were assessed using the Child Behaviour Checklist/1<sup>1/2</sup>-5 (CBCL), a  
23 parent-completed 100-item questionnaire, in which the parent rates the child's behaviour over  
24 the preceding two months using a 3-point Likert scale ("not true", "somewhat or sometimes  
25 true", and "very true or often true"). Responses are categorised into syndrome profiles, and  
26 these are subsequently grouped into internalising (emotional reactivity, anxiety/depression,  
27 somatic complaints, and withdrawal), externalising (attention problems, aggressive  
28 behaviour) and total (internalising, externalising, sleep and other) problem scales. Higher  
29 scores indicate increased emotional and behavioural problems. Total scores are classified into  
30 a normal range ( $\leq 92^{\text{rd}}$  centile,  $T \leq 64$ ), borderline range ( $93^{\text{rd}}$ - $97^{\text{th}}$  centile,  $T 65$ - $69$ ), and  
31 clinical range ( $\geq 98^{\text{th}}$  centile,  $T \geq 70$ ). The CBCL is known to have high reliability and validity  
32 for measuring children's emotional and behavioural problems.<sup>28</sup>

42  
43 *ASD traits* were assessed using the Quantitative Checklist for Autism in Toddlers (Q-CHAT).  
44 The Q-CHAT is a parent-completed 25-item questionnaire, in which the child's behaviour is  
45 scored on a 5-point (0-4) frequency scale. Higher total scores correspond to a higher  
46 frequency of autistic traits. The Q-CHAT shows good test-retest reliability, face validity and  
47 specificity, yet poor positive predictive value.<sup>29,30</sup>

53  
54 *Cognitive assessment* was performed using the Bayley Scales of Infant and Toddler  
55 Development – Third Edition (Bayley-III). The Bayley-III provides scores for a child's  
56 overall cognitive, language and motor development. The cognitive standardised composite  
57 score was used in this study; scores between 70-85 indicate mild cognitive impairment, and  
58  
59  
60

1  
2  
3 scores lower than 70 indicate moderate-severe impairment<sup>31</sup>. Reliability and validity of the  
4 Bayley-III have been shown to be robust.<sup>32</sup>  
5  
6  
7

8 Assessments were carried out by staff experienced in the neurocognitive assessments of  
9 toddlers.  
10  
11  
12

### 13 Analysis

14 Descriptive statistics and one-way ANOVA tests were performed in IBM SPSS Statistics for  
15 Windows v.25. All other analyses were carried out in Stata v.16.  
16  
17  
18  
19

20 Multiple imputation (MI) was carried out to account for missing data in CBCL (11/509,  
21 2.24%), Q-CHAT (9/509, 1.8%), maternal EPDS (73/509, 14.3%), maternal BMI (27/509,  
22 5.3%) and IMD rank (3/509, 0.6%). Variables were imputed simultaneously using the ‘mi  
23 impute chained’ procedure that performs imputation by chained equations. The imputation  
24 models included all variables that appear in the corresponding analysis models and also had  
25 the same structural form as the analysis models. They additionally included all variables  
26 correlating with the incomplete variables, as well as all predictors of the probability of a  
27 value being missing.<sup>33</sup> Maternal depression and CBCL were imputed using Poisson  
28 regression; Q-CHAT, maternal BMI, and the IMD rank were imputed using linear regression.  
29 40 MI datasets were created. To assess the stability of our MI parameters, we extracted the  
30 Monte Carlo error of each parameter estimate and examined whether the error for the  
31 coefficient was less than 10% of the parameter’s standard error estimate. MI estimates were  
32 used for the primary analyses and compared to the estimates from complete-case (CC,  
33 individuals who had no missing data pre-imputation) analyses. Normal probability plots of  
34 residuals from the CC analyses were examined.  
35  
36  
37  
38  
39  
40  
41  
42  
43  
44  
45  
46  
47

48 The analysis models used multiple linear regression with standard errors that allowed for  
49 intragroup correlation and were fitted using the ‘mi estimate’ procedure, which estimates  
50 effects after application of Rubin’s rules.<sup>34</sup> For continuous variables, Cohen’s f-squared effect  
51 sizes were calculated using  $f^2 = (R_{AB}^2 - R_A^2)/(1 - R_{AB}^2)$ , where  $R_{AB}^2$  is the R-squared value  
52 from a regression model that includes the variable of interest as well as all the covariates used  
53 in the model, and  $R_A^2$  is the R-squared value from the regression model that includes only the  
54 covariates.<sup>35,36</sup> For binary variables, Cohen’s f-squared effect sizes were produced after  
55  
56  
57  
58  
59  
60

1  
2  
3  
4  
5  
6  
7  
8  
9  
10  
11  
12  
13  
14  
15  
16  
17  
18  
19  
20  
21  
22  
23  
24  
25  
26  
27  
28  
29  
30  
31  
32  
33  
34  
35  
36  
37  
38  
39  
40  
41  
42  
43  
44  
45  
46  
47  
48  
49  
50  
51  
52  
53  
54  
55  
56  
57  
58  
59  
60

estimating first the Cohen's d using the formula:  $f^2 = \frac{d}{2k}$ , where k is the number of groups.

As a measure of dispersion, Cohen's d used the average root mean-square error over the MI datasets. Adjusted R-squared values after MI were extracted after estimating the model with the user-written 'mibeta' command with the 'fisherz' option,<sup>37</sup> which calculates R-squared measures for linear regression with MI data. The significance of the joint effect of the categorical variable parity was assessed using 'mi test' which performs Wald tests of composite linear hypotheses.

*Primary outcome measures* were children's total CBCL raw score and Q-CHAT score.

*Secondary outcome measures* were CBCL internalising and externalising scores. The effect of maternal EPDS score was adjusted for IMD rank, maternal age, maternal BMI, maternal parity, pregnancy size, and the following child's variables: gestational age, birth weight, Bayley-III cognitive composite score, and corrected age at assessment. The interaction between gestational age and maternal depression was explored using a complete case analysis in both CBCL and Q-CHAT models. EPDS, CBCL and Q-CHAT scores were compared between term and preterm infants using the complete case dataset.

In order to investigate the specificity of the association between maternal EPDS scores and child's behavioural outcomes (versus cognitive outcomes) we repeated the analyses using the Bayley-III cognitive composite score as primary outcome, with the following confounders: IMD rank, maternal age, maternal BMI, maternal parity, pregnancy size, and the following child's variables: gestational age, birth weight, corrected age at assessment, and Q-CHAT score. CBCL score was not included in the model predicting cognitive outcome, because cognition was not a significant predictor of CBCL (see Results).

As all mothers had their EPDS score measured near term-corrected age, we further investigated the association between time elapsing between baby's birth and mother's EPDS assessment and EPDS score, in order to avoid erroneously identifying 'baby blues' in mothers of term-born infants versus postnatal depression in mothers of preterm infants. This post-hoc analysis was performed using Poisson regression.

## Results

509 toddlers were followed up at a median corrected age of 18.4 months (range 17.3 – 24.3 months). 51 (10.0%) of these were twins, and 3 (0.59%) were triplets. 21/509 (4.13%) of mothers scored above a clinical cut-off ( $\geq 13$ ) on the EPDS. Demographic data are shown in Table 1. 400 (78.6%) children had complete data. Missing data were imputed and thus all 509 subjects were included in the primary and secondary analyses. One participant was excluded from the cognition analysis after examining the quintiles of the residuals against the theoretical quintiles of a normal distribution. The mean CBCL T score was 46.9 (SD 9.5) (Table 1); 484 (95.1%) of participants had a CBCL score in the normal range, 14 (2.8%) were borderline, and no participants scored in the clinical range. The mean Q-CHAT score was 30.5 (SD 9.3) (Table 1).

Predictors of children's CBCL and Q-CHAT scores after multiple imputation are shown in Table 2. Higher maternal EPDS score was associated with children's higher CBCL Total score ( $B=0.93$ , 95% CI 0.43-1.44,  $p<0.001$ ,  $f^2=0.05$ ) and Q-CHAT score ( $B=0.27$ , 95% CI 0.03-0.52,  $p=.031$ ,  $f^2=0.01$ ) (Table 2). These associations are presented graphically in Figure 1 and Figure 2, respectively. Higher maternal EPDS score was associated with both internalising ( $B=0.22$ , 95% CI 0.08-0.36,  $p<0.01$ ,  $f^2=0.03$ ) and externalising ( $B=0.40$ , 95% CI 0.20-0.61,  $p<0.001$ ,  $f^2=0.05$ ) symptoms in children (Supplementary Table 1 and 2, respectively). Comparison of the imputed model analyses to the complete-case analyses showed that results were consistent for the CBCL model (Supplementary Table 3). Comparison for the Q-CHAT model showed that maternal EPDS was a significant predictor in the imputed model, but not in the complete-case analysis (Supplementary Table 3).

Maternal EPDS scores did not differ between preterm and term groups in the complete dataset ( $t(434)=0.11$ ,  $p=0.92$ ). CBCL scores ( $t(496)=0.95$ ,  $p=0.34$ ) and Q-CHAT scores ( $t(122.6)=0.50$ ,  $p=0.62$ ) did not differ between preterm and term groups in the complete dataset. Maternal EPDS score did not disproportionately affect preterm children with respect to CBCL or Q-CHAT scores (Table 3).

Mothers who gave birth prematurely (<37 weeks gestation) had their EPDS score assessed on average 7.7 weeks later post-delivery than mothers who gave birth at term (preterm participants  $M=8.9$  (SD 4.8), term participants  $M=1.2$  (SD 1.3);  $t(99.4)=15.5$ ,  $p<.001$ ). The time-lag between birth and EPDS assessment did not predict maternal EPDS score, and there

1  
2  
3 was no evidence of a significant interaction between gestation and birth-to-assessment time-  
4 lag (Supplementary Table 4 and 5, respectively).  
5  
6  
7

8 Boys had higher CBCL and Q-CHAT scores than girls. Higher Q-CHAT scores were  
9 associated with lower IMD rank (i.e., greater socio-economic deprivation) and lower Bayley-  
10 III cognitive composite scores. Parity was not a significant predictor of outcome in any of the  
11 models (Table 2).  
12  
13  
14  
15  
16

17 The mean Bayley III cognitive composite score in our sample was 100 (SD 11.4) (Table 1);  
18 this corresponds to the standardised test mean.<sup>31</sup> 480 (94.3%) of participants had a normal  
19 cognitive score, 24 (4.7%) had mild impairment, and 5 (1%) had moderate-severe  
20 impairment. Predictors of children's cognitive score are shown in Table 4. Maternal EPDS  
21 score at term was not associated with toddlers' cognitive outcomes ( $B=-0.22$ , 95% CI -0.50-  
22 0.05,  $p=.108$ ) (Table 4).  
23  
24  
25  
26  
27  
28  
29  
30

## 31 **Discussion**

### 32 **Principal findings**

33 Contrary to our predictions, mothers of preterm infants did not display more depressive  
34 symptoms compared to mothers of term infants. Moreover, gestational age not influence the  
35 association between maternal depressive symptoms and infants' behavioural outcomes in  
36 toddlerhood. These results suggest that preterm birth may not be a vulnerability or plasticity  
37 factor with respect to the effect of maternal postnatal depression on infants' behavioural  
38 development in the first 18 months of life. However, our results do suggest that more  
39 maternal self-reported depressive symptoms shortly after birth are associated with greater  
40 toddlers' behavioural problems and ASD traits, but not with cognitive outcomes. Given that  
41 fewer than 5% of the mothers in our cohort had EPDS scores above a clinical threshold,<sup>26</sup> our  
42 findings indicate that even subclinical depressive symptoms adversely impact children's  
43 behavioural outcomes. In addition, our cohort was typically developing with few CBCL  
44 scores reaching a concerning threshold; our results could be interpreted within the conceptual  
45 framework of mental illness lying on a continuum with typical behavioural traits.<sup>38</sup>  
46  
47  
48  
49  
50  
51  
52  
53  
54  
55  
56  
57

### 58 **Comparison to prior literature**

59  
60

1  
2  
3 The finding that more preterm infants were not disproportionately affected by maternal  
4 depressive symptoms supports Hadfield et al.'s findings that maternal distress at 9 months did  
5 not differentially impact very preterm (<34 weeks) or late preterm (34-36<sup>+6</sup> weeks) infants  
6 with respect to socioemotional outcomes, although paternal distress did have an impact on  
7 very preterm infants' outcomes.<sup>39</sup> However, our results differ from Gueron-Sela et al.'s  
8 finding that very preterm (28-33 weeks) 12 month old infants' social outcomes were more  
9 influenced by maternal emotional distress at 6 months than term infants' outcomes.<sup>22</sup> The  
10 inconsistent findings may be due to methodological differences: for instance, our infant  
11 assessment being conducted at 18 months corrected age when social competency is more  
12 developed, our assessment of maternal depressive symptoms being in the very early postnatal  
13 period, or our use of a screening measure, the Q-CHAT, as a measure of ASD traits.  
14 Importantly, the lack of support for a diathesis-stress or differential susceptibility model of  
15 maternal mental state on younger preterm infants in our study must be viewed in the context  
16 of our results also showing no difference in CBCL and Q-CHAT scores between term and  
17 preterm infants. This is in contrast to the existing literature that preterm infants are more  
18 likely to develop behavioural problems, such as ADHD, in childhood and adolescence.<sup>19,24</sup> It  
19 is possible that the phenotypes of neurodevelopmental and neuropsychiatric disorders  
20 assessed with the chosen behavioural measures may not be sufficiently expressed at 18  
21 months corrected age.<sup>40</sup> In addition, as briefly discussed above, much of the existing literature  
22 emphasises the risk of extreme (<28 weeks) or very preterm (28-33 weeks) birth on later  
23 mental health outcomes,<sup>19,24</sup> whereas only 3.5% and 5.5% of our participants fell within the  
24 extreme and very preterm birth group, respectively, and we thus may not have the power to  
25 show any subtle effects.  
26  
27  
28  
29  
30  
31  
32  
33  
34  
35  
36  
37  
38  
39  
40  
41  
42  
43  
44

45 Our results with respect to internalising and externalising behavioural outcomes are in line  
46 with previous studies, including large population cohort studies, that show an association  
47 between postnatal maternal depression and young children's emotional and behavioural  
48 problems.<sup>11</sup> The only previous study investigating this association in infants at 18 months  
49 found maternal depression to be associated with internalising and dysregulated behaviour, but  
50 not externalising symptoms.<sup>41</sup> This difference between our and Conroy et al.'s findings may  
51 have arisen from their exclusion of infants born <36 weeks and their use of a clinical  
52 diagnosis of depression for mothers, rather than the dimensional approach we employed.  
53 Interestingly, our finding that even subclinical depressive symptoms may adversely impact  
54  
55  
56  
57  
58  
59  
60



1  
2  
3 children's behavioural outcomes is in line with recent data showing that low- as well as high-  
4 level depressive symptoms are associated with internalising and externalising symptoms in  
5 children aged 3 years.<sup>42</sup>  
6  
7  
8  
9

10 The results showing an association between maternal postnatal depressive symptoms and  
11 childhood ASD are less robust and need to be interpreted with caution. Although some prior  
12 studies have reported an association between antenatal maternal depression and offspring's  
13 ASD,<sup>10,43</sup> and postnatal depression has been suggested as a potential focus of cross-domain  
14 studies of ASD,<sup>44</sup> there is no clear aetiological role of maternal postnatal depression in the  
15 development of ASD *per se*. Also, given that mothers with ASD are more likely to suffer  
16 from perinatal depression than mothers without ASD,<sup>45</sup> and ASD is highly heritable,<sup>46</sup>  
17 maternal depression may be a confounder in our observed results.  
18  
19  
20  
21  
22  
23  
24  
25

### 26 **Strengths & limitations of the study**

27 The strengths of this study lie primarily in its large sample and prospective data collection.  
28 Moreover, the use of multiple imputation methodology has facilitated retention of a complete  
29 dataset, thus minimising non-response bias and increasing parameter precision. A strength in  
30 comparison to prior population cohort studies is that we assessed very early maternal  
31 depressive symptoms. Given the complex interplay of biological and environmental factors in  
32 the aetiology of mental health disorders, the inclusion of a substantive proportion of preterm  
33 infants in our cohort also offers an important insight into the role of preterm birth in  
34 influencing mental health outcomes; moreover, our results represent the full gestational  
35 spectrum, rather than discrete gestational categories. In addition, using maternal depression as  
36 a continuous, rather than dichotomous, variable allows a more nuanced understanding of the  
37 role maternal postnatal depressive symptoms may play in influencing children's outcomes.  
38  
39  
40  
41  
42  
43  
44  
45  
46  
47

48 There are five main limitations to this study. Firstly, differences in birth-to-EPDS-assessment  
49 time-lags are a potential confounder, given the time-sensitive nature of early-onset temporary  
50 baby blues and later-onset pathological postnatal depression. Mothers of infants born at term  
51 were assessed early post-delivery, within the period one would anticipate baby blues to  
52 present, whereas mothers of preterm participants were on average assessed later, when  
53 postnatal depression predominates.<sup>1,2</sup> Although our post-hoc analyses showed no association  
54 between the time elapsed from birth to EPDS assessment and maternal EPDS score,  
55 providing reassurance that our assessments of mothers of term-born infants were not inflated  
56  
57  
58  
59  
60

1  
2  
3 by the common, temporary symptoms of baby blues, it is however possible that we did not  
4 capture the full extent of later-onset depressive symptoms in mothers of term-born infants.  
5 This may explain why maternal EPDS scores did not differ between preterm and term groups  
6 in our complete dataset analysis, contrary to the current literature.<sup>23</sup> Secondly, a number of  
7 important confounders that are likely to affect children's behavioural outcomes were not  
8 assessed in this study, including genetic risk for psychiatric disorders,<sup>47</sup> parental psychiatric  
9 co-morbidities,<sup>41</sup> chronicity of postnatal depressive symptoms,<sup>42</sup> antenatal maternal  
10 depression, paternal depression and subsequent parent-infant attachment, and inter-parental  
11 conflict.<sup>11</sup> In this study we did not systematically collect maternal psychiatric history and our  
12 focus was on symptoms rather than a diagnosis of depression. Thus, we are unable to  
13 conclude whether our observed associations between early postnatal maternal depressive  
14 symptoms and children's mental health outcomes are moderated or mediated by other  
15 parental factors. Thirdly, whilst our study included a substantive proportion of preterm  
16 infants (97/509, 19%), the sample was not random, as preterm children were selectively  
17 recruited for the DHCP; indeed, preterm infants are over-represented in our sample when  
18 compared to the UK population incidence (7.3%),<sup>48</sup> which may limit the study's  
19 generalisability to the general population. Fourthly, the effect sizes of the association between  
20 maternal EPDS score and behavioural problems and ASD traits, respectively, were small; this  
21 raises questions regarding the clinical significance of our findings and potentially explains  
22 some of the inconsistency between this and previous studies. Even within our analyses, the  
23 association between maternal depressive symptoms and ASD traits was not observed in our  
24 complete case analysis, thus calling into question the validity of this result. It is also  
25 important to highlight the continuum of ASD traits that are conceptualised by the Q-CHAT,<sup>29</sup>  
26 as well as its poor positive predictive value;<sup>30</sup> the presence of traits does not imply a  
27 diagnosis of ASD, and this distinction may also explain the contrast to previous studies.  
28 Fifthly, the outcome measures used in this study were parent-completed questionnaires and it  
29 is possible that reporting bias with shared method variance may have skewed our results, as  
30 maternal depression has been shown to influence reporting of ASD traits,<sup>49</sup> including the Q-  
31 CHAT,<sup>50</sup> and CBCL scores.<sup>51</sup>

### 54 **Implications of our findings**

55 Of greatest importance to clinicians and policymakers is our finding that even *subclinical*  
56 maternal depressive symptoms are associated with behavioural outcomes of offspring. This  
57 has significant implications for the risk-stratification of women and their babies in the  
58  
59  
60

1  
2  
3 postnatal period, during which contact with medical professionals is already established.  
4 Identifying high risk families and providing appropriate supportive measures at the early  
5 postnatal stage may help to prevent future psychiatric morbidity.  
6  
7  
8  
9

### 10 **Future research**

11 Further follow-up of large cohorts of preterm and term infants, to an age when behavioural  
12 phenotypes may become more pronounced, is needed to investigate whether the long-term  
13 developmental trajectories of term and ex-preterm infants are differentially susceptible to  
14 changes of postnatal maternal mental health. Such follow-up should use independent,  
15 objective assessments of child behavioural outcomes. Further study is also needed to  
16 elucidate the role of maternal depression in the aetiology of ASD, controlling for both  
17 diagnostic and sub-clinical maternal ASD symptomatology. Finally, it is crucial for future  
18 research to elucidate the interplay of biochemical and neurodevelopmental changes that may  
19 mediate and confound the translation of environmental exposures into distal behavioural  
20 phenotypes.  
21  
22  
23  
24  
25  
26  
27  
28  
29  
30

### 31 **Conclusion**

32 This prospective longitudinal cohort study found no evidence to support the concept of  
33 preterm birth as a vulnerability or plasticity factor with respect to the effect of maternal  
34 depressive symptoms on behavioural development. However, we do show that early  
35 subclinical maternal postnatal depressive symptoms are associated with behavioural problems  
36 in children. This adds to the increasing body of literature indicating the role of subclinical and  
37 early postnatal depressive symptoms in the aetiology of childhood mental health disorders.  
38 These findings are of great relevance to child and public health, and have potentially  
39 significant implications for developing strategies to facilitate effective screening and support  
40 for women and children, enabling all to reach their full potential.  
41  
42  
43  
44  
45  
46  
47  
48  
49  
50

### 51 **Acknowledgements & contributions**

52 We thank all DHCP investigators for their contribution to the study. We thank Dr Oliver  
53 Gale-Grant MRes (Centre for the Developing Brain, King's College London; Department of  
54 Forensic & Neurodevelopmental Sciences, King's College London) for providing the IMD  
55 rank data. We are very grateful to the families who generously took part in this research.  
56  
57  
58  
59  
60

**Conceptualization:** SC, ADE, CN; **Methodology:** IK, GV, SC, AP, ADE, CN;  
**Investigation:** SF, AC; **Data curation:** IK, AL; **Formal analysis:** IK, GV, AP, CN;  
**Writing – original draft preparation:** IK; **Writing – Review & Editing:** GV, AL, SF, AC,  
 SC, AP, ADE, CN; **Visualisation:** IK, GV; **Funding acquisition:** SC, ADE; **Supervision:**  
 AP, ADE, CN.

## References

1. Woody CA, Ferrari AJ, Siskind DJ, Whiteford HA, Harris MG. A systematic review and meta-regression of the prevalence and incidence of perinatal depression. *J Affect Disord.* 2017;219:86-92. doi:10.1016/j.jad.2017.05.003
2. Henshaw C. Mood disturbance in the early puerperium: a review. *Arch Women's Ment Health.* 2003;6(2):s33-s42. doi:10.1007/s00737-003-0004-x
3. Beck CT. Predictors of postpartum depression: an update. *Nurs Res.* 2001;50(5):275-285.
4. Vigod SN, Villegas L, Dennis C-L, Ross LE. Prevalence and risk factors for postpartum depression among women with preterm and low-birth-weight infants: a systematic review. *BJOG Int J Obstet Gynaecol.* 2010;117(5):540-550. doi:10.1111/j.1471-0528.2009.02493.x
5. Blom EA, Jansen PW, Verhulst FC, et al. Perinatal complications increase the risk of postpartum depression. The Generation R Study. *BJOG Int J Obstet Gynaecol.* 2010;117(11):1390-1398. doi:10.1111/j.1471-0528.2010.02660.x
6. Beck CT. Postpartum depression: a metasynthesis. *Qual Health Res.* 2002;12(4):453-472. doi:10.1177/104973202129120016
7. Grace SL, Evindar A, Stewart DE. The effect of postpartum depression on child cognitive development and behavior: a review and critical analysis of the literature. *Arch Womens Ment Health.* 2003;6(4):263-274. doi:10.1007/s00737-003-0024-6
8. Lebel C, Walton M, Letourneau N, Giesbrecht GF, Kaplan BJ, Dewey D. Prepartum and Postpartum Maternal Depressive Symptoms Are Related to Children's Brain Structure in Preschool. *Biol Psychiatry.* 2016;80(11):859-868. doi:10.1016/j.biopsych.2015.12.004
9. Goodman SH, Rouse MH, Connell AM, Broth MR, Hall CM, Heyward D. Maternal depression and child psychopathology: a meta-analytic review. *Clin Child Fam Psychol Rev.* 2011;14(1):1-27. doi:10.1007/s10567-010-0080-1
10. Hagberg KW, Robijn AL, Jick S. Maternal depression and antidepressant use during pregnancy and the risk of autism spectrum disorder in offspring. *Clin Epidemiol.* 2018;10:1599-1612. doi:10.2147/CLEP.S180618

11. Stein A, Pearson RM, Goodman SH, et al. Effects of perinatal mental disorders on the fetus and child. *The Lancet*. 2014;384(9956):1800-1819. doi:10.1016/S0140-6736(14)61277-0
12. Van Batenburg-Eddes T, Brion MJ, Henrichs J, et al. Parental depressive and anxiety symptoms during pregnancy and attention problems in children: a cross-cohort consistency study. *J Child Psychol Psychiatry*. 2013;54(5):591-600. doi:10.1111/jcpp.12023
13. Barker ED, Jaffee SR, Uher R, Maughan B. The contribution of prenatal and postnatal maternal anxiety and depression to child maladjustment. *Depress Anxiety*. 2011;28(8):696-702. doi:10.1002/da.20856
14. Pearson RM, Evans J, Kounali D, et al. Maternal depression during pregnancy and the postnatal period: risks and possible mechanisms for offspring depression at 18 years. *JAMA Psychiatry*. 2013;70(12):1312-1319. doi:10.1001/jamapsychiatry.2013.2163
15. Kleine I, Falconer S, Roth S, et al. Early postnatal maternal trait anxiety is associated with the behavioural outcomes of children born preterm <33 weeks. *J Psychiatr Res*. 2020;131:160-168. doi:10.1016/j.jpsychires.2020.09.010
16. Feder A, Nestler EJ, Charney DS. Psychobiology and molecular genetics of resilience. *Nat Rev Neurosci*. 2009;10(6):446-457. doi:10.1038/nrn2649
17. Dimitrova R, Pietsch M, Christiaens D, et al. Heterogeneity in brain microstructural development following preterm birth. *Cereb Cortex*. 2020;30(9):4800-4810. doi:10.1093/cercor/bhaa069
18. Fitzallen GC, Sagar YK, Taylor HG, Bora S. Anxiety and Depressive Disorders in Children Born Preterm: A Meta-Analysis. *J Dev Behav Pediatr JDBP*. 2021;42(2):154-162. doi:10.1097/DBP.0000000000000898
19. Allotey J, Zamora J, Cheong-See F, et al. Cognitive, motor, behavioural and academic performances of children born preterm: a meta-analysis and systematic review involving 64 061 children. *BJOG Int J Obstet Gynaecol*. 2018;125(1):16-25. doi:10.1111/1471-0528.14832
20. Jaekel J, Pluess M, Belsky J, Wolke D. Effects of maternal sensitivity on low birth weight children's academic achievement: a test of differential susceptibility versus diathesis stress. *J Child Psychol Psychiatry*. 2015;56(6):693-701. doi:10.1111/jcpp.12331
21. Belsky J, Bakermans-Kranenburg MJ, van IJzendoorn MH. For better and for worse: differential susceptibility to environmental influences. *Curr Dir Psychol Sci*. 2007;16(6):300-304. doi:10.1111/j.1467-8721.2007.00525.x
22. Gueron-Sela N, Atzaba-Poria N, Meiri G, Marks K. The caregiving environment and developmental outcomes of preterm infants: diathesis stress or differential susceptibility effects? *Child Dev*. 2015;86(4):1014-1030. doi:https://doi.org/10.1111/cdev.12359

23. Carson C, Redshaw M, Gray R, Quigley MA. Risk of psychological distress in parents of preterm children in the first year: evidence from the UK Millennium Cohort Study. *BMJ Open*. 2015;5(12):e007942. doi:10.1136/bmjopen-2015-007942
24. Johnson S, Wolke D. Behavioural outcomes and psychopathology during adolescence. *Early Hum Dev*. 2013;89(4):199-207. doi:10.1016/j.earlhumdev.2013.01.014
25. Ministry of Housing, Communities & Local Government. The English Indices of Deprivation 2019. Published online 2019. [https://assets.publishing.service.gov.uk/government/uploads/system/uploads/attachment\\_data/file/835115/IoD2019\\_Statistical\\_Release.pdf](https://assets.publishing.service.gov.uk/government/uploads/system/uploads/attachment_data/file/835115/IoD2019_Statistical_Release.pdf)
26. Cox JL, Holden JM, Sagovsky R. Detection of postnatal depression: development of the 10-item Edinburgh Postnatal Depression Scale. *Br J Psychiatry*. 1987;150(6):782-786. doi:10.1192/bjp.150.6.782
27. Levis B, Negeri Z, Sun Y, Benedetti A, Thombs BD. Accuracy of the Edinburgh Postnatal Depression Scale (EPDS) for screening to detect major depression among pregnant and postpartum women: systematic review and meta-analysis of individual participant data. *BMJ*. 2020;371. doi:10.1136/bmj.m4022
28. Achenbach TM, Rescorla LA. *Manual for the ASEBA Preschool Forms & Profiles.*; 2000.
29. Allison C, Baron-Cohen S, Wheelwright S, et al. The Q-CHAT (Quantitative Checklist for Autism in Toddlers): a normally distributed quantitative measure of autistic traits at 18-24 months of age: preliminary report. *J Autism Dev Disord*. 2008;38(8):1414-1425. doi:10.1007/s10803-007-0509-7
30. Allison C, Matthews FE, Ruta L, et al. Quantitative Checklist for Autism in Toddlers (Q-CHAT). A population screening study with follow-up: the case for multiple time-point screening for autism. *BMJ Paediatr Open*. 2021;5(1):e000700. doi:10.1136/bmjpo-2020-000700
31. Bayley N. *Bayley Scales of Infant and Toddler Development - Third Edition*. 3rd ed. Harcourt Assessment; 2006.
32. Albers CA, Grieve AJ. Review of Bayley Scales of Infant and Toddler Development--Third Edition. *J Psychoeduc Assess*. 2007;25(2):180-190. doi:10.1177/0734282906297199
33. White IR, Royston P, Wood AM. Multiple imputation using chained equations: Issues and guidance for practice. *Stat Med*. 2011;30(4):377-399. doi:<https://doi.org/10.1002/sim.4067>
34. Rubin DB. Inference and missing data. *Biometrika*. 1976;63(3):581-592. doi:10.2307/2335739
35. Cohen J. *Statistical Power Analysis for the Behavioral Sciences*. 2nd ed. L. Erlbaum Associates; 1988.

- 1
- 2
- 3
- 4 36. Selya AS, Rose JS, Dierker LC, Hedeker D, Mermelstein RJ. A practical guide to
- 5 calculating Cohen's  $f^2$ , a measure of local effect size, from PROC MIXED. *Front*
- 6 *Psychol.* 2012;3. doi:10.3389/fpsyg.2012.00111
- 7
- 8 37. Harel O. The estimation of  $R^2$  and adjusted  $R^2$  in incomplete data sets using multiple
- 9 imputation. *J Appl Stat.* 2009;36(10):1109-1118. doi:10.1080/02664760802553000
- 10
- 11 38. Plomin R, Haworth CMA, Davis OSP. Common disorders are quantitative traits. *Nat*
- 12 *Rev Genet.* 2009;10(12):872-878. doi:10.1038/nrg2670
- 13
- 14 39. Hadfield K, O'Brien F, Gerow A. Is level of prematurity a risk/plasticity factor at three
- 15 years of age? *Infant Behav Dev.* 2017;47:27-39. doi:10.1016/j.infbeh.2017.03.003
- 16
- 17 40. Egger HL, Emde RN. Developmentally sensitive diagnostic criteria for mental health
- 18 disorders in early childhood: the diagnostic and statistical manual of mental disorders-
- 19 IV, the research diagnostic criteria-preschool age, and the diagnostic classification of
- 20 mental health and developmental disorders of infancy and early childhood-revised. *Am*
- 21 *Psychol.* 2011;66(2):95-106. doi:10.1037/a0021026
- 22
- 23
- 24 41. Conroy S, Pariante CM, Marks MN, et al. Maternal psychopathology and infant
- 25 development at 18 months: the impact of maternal personality disorder and depression.
- 26 *J Am Acad Child Adolesc Psychiatry.* 2012;51(1):51-61. doi:10.1016/j.jaac.2011.10.007
- 27
- 28
- 29 42. Kingston D, Kehler H, Austin M-P, et al. Trajectories of maternal depressive symptoms
- 30 during pregnancy and the first 12 months postpartum and child externalizing and
- 31 internalizing behavior at three years. *PloS One.* 2018;13(4):e0195365.
- 32 doi:10.1371/journal.pone.0195365
- 33
- 34 43. Wiggins LD, Rubenstein E, Daniels J, et al. A phenotype of childhood autism is
- 35 associated with preexisting maternal anxiety and depression. *J Abnorm Child Psychol.*
- 36 2019;47(4):731-740. doi:10.1007/s10802-018-0469-8
- 37
- 38
- 39 44. Babb JA, Deligiannidis KM, Murgatroyd CA, Nephew BC. Peripartum depression and
- 40 anxiety as an integrative cross-domain target for psychiatric preventative measures.
- 41 *Behav Brain Res.* 2015;0:32-44. doi:10.1016/j.bbr.2014.03.039
- 42
- 43 45. Pohl AL, Crockford SK, Blakemore M, Allison C, Baron-Cohen S. A comparative study
- 44 of autistic and non-autistic women's experience of motherhood. *Mol Autism.*
- 45 2020;11(1):3. doi:10.1186/s13229-019-0304-2
- 46
- 47 46. Colvert E, Tick B, McEwen F, et al. Heritability of autism spectrum disorder in a UK
- 48 population-based twin sample. *JAMA Psychiatry.* 2015;72(5):415-423.
- 49 doi:10.1001/jamapsychiatry.2014.3028
- 50
- 51
- 52 47. Biel MG. Parental psychiatric symptoms and children's outcomes: toward
- 53 understanding and responding to intergenerational risk in child psychiatry. *J Am Acad*
- 54 *Child Adolesc Psychiatry.* 2018;57(9):632-633. doi:10.1016/j.jaac.2018.06.010
- 55
- 56 48. National Institute for Health and Care Excellence. Preterm labour and birth (NICE
- 57 Guideline 25). Published online November 2015. Accessed January 27, 2019.
- 58 <https://www.nice.org.uk/guidance/ng25>
- 59
- 60

- 1  
2  
3  
4  
5  
6  
7  
8  
9  
10  
11  
12  
13  
14  
15  
16  
17  
18  
19  
20  
21  
22  
23  
24  
25  
26  
27  
28  
29  
30  
31  
32  
33  
34  
35  
36  
37  
38  
39  
40  
41  
42  
43  
44  
45  
46  
47  
48  
49  
50  
51  
52  
53  
54  
55  
56  
57  
58  
59  
60
49. Bennett T, Boyle M, Georgiades K, et al. Influence of reporting effects on the association between maternal depression and child autism spectrum disorder behaviors. *J Child Psychol Psychiatry*. 2012;53(1):89-96. doi:10.1111/j.1469-7610.2011.02451.x
  50. Goh DA, Gan D, Kung J, et al. Child, Maternal and Demographic Factors Influencing Caregiver-Reported Autistic Trait Symptomatology in Toddlers. *J Autism Dev Disord*. 2018;48(4):1325-1337. doi:10.1007/s10803-018-3471-7
  51. Friedlander S, Weiss DS, Traylor J. Assessing the influence of maternal depression on the validity of the Child Behavior Checklist. *J Abnorm Child Psychol*. 1986;14(1):123-133. doi:10.1007/bf00917228

For peer review only



**Table 1: Socio-demographic, maternal and clinical characteristics (n=509)**

| Variable                                          | Number (%)*        |
|---------------------------------------------------|--------------------|
| Sex: Male                                         | 274 (53.8)         |
| Index of Multiple Deprivation (IMD) quintiles     |                    |
| 1 (least deprived) <sup>a</sup>                   | 65 (12.8)          |
| 2                                                 | 87 (17.2)          |
| 3                                                 | 108 (21.3)         |
| 4                                                 | 173 (34.2)         |
| 5 (most deprived)                                 | 73 (14.4)          |
| Gestational age at birth (weeks), median [range]  | 39.7 [20 – 43]     |
| Gestational category                              |                    |
| Preterm (<37 weeks)                               | 97 (19.1)          |
| Term (≥37 weeks)                                  | 412 (80.9)         |
| Birthweight (g), median [range]                   | 3290 [450 – 4750]  |
| Multiple pregnancy                                | 54 (10.6)          |
| Maternal parity                                   |                    |
| 0                                                 | 332 (65.2)         |
| 1                                                 | 124 (24.4)         |
| 2                                                 | 32 (6.3)           |
| 3+                                                | 21 (4.2)           |
| Maternal BMI (kg/m <sup>2</sup> ), median [range] | 23.2 [15.3 – 43.6] |
| Maternal age at infant's birth (years), mean (SD) | 34.2 (4.8)         |
| Bayley III cognitive composite score, mean (SD)   | 100 (11.4)         |
| CBCL total T score, mean (SD)                     | 46.9 (9.5)         |
| Q-CHAT total score, mean (SD)                     | 30.5 (9.3)         |
| EPDS score, median [range]                        | 4 [0 – 28]         |

<sup>a</sup> Quintile 1 corresponds to the highest, least deprived, IMD rankings.

\* unless otherwise specified

**Table 2: CBCL and Q-CHAT model predictors using multiple imputation without interaction.** (Cf. Supplementary Table 3 for complete case analysis)

|                                             | CBCL                 |           |                | Q-CHAT               |                   |                |
|---------------------------------------------|----------------------|-----------|----------------|----------------------|-------------------|----------------|
|                                             | B [95%CI]            | p         | f <sup>2</sup> | B [95%CI]            | p                 | f <sup>2</sup> |
| <b>Maternal EPDS</b>                        | 0.93 [0.43, 1.44]    | <.001 *** | 0.05           | 0.27 [0.03, 0.52]    | .031 *            | 0.01           |
| <b>Maternal BMI</b>                         | -0.09 [-0.44, 0.26]  | .621      | -              | 0.06 [-0.13, 0.24]   | .538              | -              |
| <b>Multiple pregnancy</b>                   | 3.15 [-3.07, 9.37]   | .320      | -              | 1.33 [-2.62, 5.28]   | .509              | -              |
| <b>Parity</b>                               |                      |           |                |                      |                   |                |
| <b>1</b>                                    | -2.52 [-5.96, 0.93]  | .151      | -              | -2.14 [-4.02, -0.27] | .025 <sup>a</sup> | -              |
| <b>2</b>                                    | -3.23 [-9.16, 2.70]  | .285      | -              | 0.88 [-1.99, 3.75]   | .548              | -              |
| <b>3+</b>                                   | -1.37 [-8.36, 5.61]  | .699      | -              | -0.49 [-4.57, 3.60]  | .815              | -              |
| <b>IMD rank</b>                             | -1.48 [-3.33, 0.37]  | .117      | -              | -1.50 [-2.60, -0.40] | .008 **           | 0.02           |
| <b>Gestational age at birth (weeks)</b>     | 0.10 [-0.65, 0.85]   | .786      | -              | 0.26 [-0.17, 0.70]   | .233              | -              |
| <b>Birthweight (kg)</b>                     | 0.56 [-2.65, 3.78]   | .731      | -              | -1.24 [-2.93, 0.46]  | .151              | -              |
| <b>Sex:female</b>                           | -4.14 [-6.96, -1.31] | .004 **   | 0.06           | -1.95 [-3.42, -0.48] | .009 **           | 0.05           |
| <b>Corrected age at assessment (months)</b> | -0.90 [-2.17, 0.37]  | .166      | -              | -0.16 [-0.91, 0.59]  | .677              | -              |
| <b>Cognition</b>                            | -0.05 [-0.20, 0.09]  | .467      | -              | -0.27 [-0.35, -0.20] | <.001 ***         | 0.12           |

p<0.05 \*; p<0.01 \*\*; p<0.001 \*\*\*

CBCL model adjusted R<sup>2</sup> = 0.0676. Q-CHAT model adjusted R<sup>2</sup> = 0.193.

B = unstandardised coefficient.

CBCL = Child Behaviour Checklist score at 18 months. Q-CHAT = Quantitative Checklist for Autism in Toddlers score at 18 months. Maternal EPDS = maternal Edinburgh Postnatal Depression Scale score at term-corrected age. Multiple pregnancy = dummy variable of twin/triplet pregnancy. Parity = dummy variable, one/two/three+ previous child(ren). Corrected age at assessment (months) = age at behavioural assessment, corrected for gestational age. Cognition = infant Bayley III score at 18 months.

<sup>a</sup> Wald test of whole parity variable in Q-CHAT model: F(3, 476.9) = 1.88, p = .133

Effect size (Cohen's f<sup>2</sup>, calculated from squared part correlations for predictors significant to 0.05): 0.02 = small, 0.15 = medium and 0.35 = large.[25]

- indicates data not given, as predictor not significant to 0.05.

**Table 3: CBCL and Q-CHAT model predictors using complete case analysis with interaction of ‘EPDS x term’.**

|                                             | CBCL                 |         | Q-CHAT               |           |
|---------------------------------------------|----------------------|---------|----------------------|-----------|
|                                             | B [95%CI]            | p       | B [95%CI]            | p         |
| <b>Maternal EPDS</b>                        | 0.89 [-0.24, 2.02]   | .121    | 0.24 [-0.28, 0.75]   | .365      |
| <b>Maternal BMI</b>                         | -0.01 [-0.39, 0.37]  | .955    | 0.00 [-0.16, 0.17]   | .982      |
| <b>Multiple pregnancy</b>                   | 1.76 [-6.65, 10.17]  | .681    | 0.97 [-2.07, 4.01]   | .532      |
| <b>Parity</b>                               |                      |         |                      |           |
| <b>1</b>                                    | -2.75 [-6.49, 0.99]  | .149    | -1.42 [-3.30, 0.46]  | .139      |
| <b>2</b>                                    | -3.49 [-10.36, 3.37] | .317    | 0.16 [-2.84, 3.16]   | .917      |
| <b>3+</b>                                   | -1.17 [-9.69, 7.35]  | .788    | -1.13 [-4.24, 1.98]  | .476      |
| <b>IMD rank</b>                             | -1.41 [-3.54, 0.73]  | .195    | -1.68 [-2.64, -0.72] | .001 **   |
| <b>Gestation: term</b>                      | 1.25 [-8.34, 10.85]  | .797    | 2.64 [-1.74, 7.02]   | .236      |
| <b>Birthweight (kg)</b>                     | -1.01 [-4.08, 2.05]  | .516    | -2.25 [-3.73, -0.78] | .003 **   |
| <b>Sex: female</b>                          | -4.64 [-7.83, -1.44] | .005 ** | -2.22 [-3.72, -0.71] | .004 **   |
| <b>Corrected age at assessment (months)</b> | -0.83 [-2.27, 0.62]  | .261    | -0.39 [-1.18, 0.04]  | .335      |
| <b>Cognition</b>                            | -0.03 [-0.20, 0.14]  | .720    | -0.22 [-0.29, -0.15] | <.001 *** |
| <b>EPDS x gestation:term</b>                | -0.01 [-1.30, 1.28]  | .991    | -0.02 [-0.60, 0.56]  | .950      |

p<0.05 \*; p<0.01 \*\*; p<0.001 \*\*\*

CBCL model adjusted R<sup>2</sup> = 0.0865. Q-CHAT model adjusted R<sup>2</sup> = 0.215.

B = unstandardised coefficient.

CBCL = Child Behaviour Checklist score at 18 months. Q-CHAT = Quantitative Checklist for Autism in Toddlers score at 18 months. Maternal EPDS = maternal Edinburgh Postnatal Depression Scale score at term-corrected age. Multiple pregnancy = dummy variable of twin/triplet pregnancy. Parity = dummy variable, one/two/three+ previous child(ren). Gestation: term = dummy variable, term (≥37 weeks) vs preterm (<37 weeks) gestation at birth. Corrected age at assessment (months) = age at behavioural assessment, corrected for gestational age. Cognition = infant Bayley III score at 18 months. EPDS x gestation:term = interaction term between maternal EPDS score and term gestation at birth.

**Table 4: Cognition model predictors using multiple imputation.**

|                                             | <b>B [95%CI]</b>     | <b>p</b>          |
|---------------------------------------------|----------------------|-------------------|
| <b>Maternal EPDS</b>                        | -0.22 [-0.50, 0.05]  | .108              |
| <b>Maternal BMI</b>                         | -0.32 [-0.52, -0.13] | .001 **           |
| <b>Multiple pregnancy</b>                   | 1.65 [-2.49, 5.79]   | .433              |
| <b>Parity</b>                               |                      |                   |
| <b>1</b>                                    | -0.46 [-2.67, 1.76]  | .686              |
| <b>2</b>                                    | -3.47 [-6.69, -0.25] | .035 <sup>a</sup> |
| <b>3+</b>                                   | -4.57 [-9.53, 0.40]  | .072              |
| <b>IMD rank</b>                             | 1.43 [0.37, 2.50]    | .009 **           |
| <b>Gestational age at birth (weeks)</b>     | 0.45 [-0.07, 0.96]   | .091              |
| <b>Birthweight (kg)</b>                     | 0.81 [-1.24, 2.87]   | .436              |
| <b>Sex: female</b>                          | 1.99 [0.24, 3.74]    | .026 *            |
| <b>Corrected age at assessment (months)</b> | -0.75 [-1.59, 0.08]  | .075              |
| <b>Q-CHAT score</b>                         | -0.39 [-0.50, -0.28] | <.001 ***         |

p<0.05 \*; p<0.01 \*\*; p<0.001 \*\*\*

Adjusted R<sup>2</sup> = 0.231

B = unstandardised coefficient.

Maternal EPDS = maternal Edinburgh Postnatal Depression Scale score at term-corrected age.

Multiple pregnancy = dummy variable of twin/triplet pregnancy. Parity = dummy variable, one/two/three+ previous child(ren). Corrected age at assessment (months) = age at behavioural assessment, corrected for gestational age. Cognition = infant Bayley III score at 18 months. Q-CHAT score = infant's Q-CHAT score at 18 month assessment.

<sup>a</sup> Wald test of whole parity variable in cognition model: F(3, 482.9)=2.41, p=0.067

**Fig.1** Children's predicted CBCL scores at 18 months are positively correlated to the maternal EPDS score at term corrected age

**Fig.2** Children's predicted Q-CHAT scores at 18 months are positively correlated to the maternal EPDS score at term corrected age

1  
2  
3 **Supplemental material**  
4

5 **Supplementary Table 1:** CBCL internalising symptom model predictors using multiple imputation  
6

7 **Supplementary Table 2:** CBCL externalising symptom model predictors using multiple imputation  
8

9 **Supplementary Table 3:** CBCL and Q-CHAT model predictors using complete case analysis without interaction.  
10

11 **Supplementary Table 4:** EPDS score predictors  
12

13 **Supplementary Table 5:** EPDS score predictors including interaction 'term x time-lag'  
14  
15  
16  
17  
18  
19  
20  
21  
22  
23  
24  
25  
26  
27  
28  
29  
30  
31  
32  
33  
34  
35  
36  
37  
38  
39  
40  
41  
42  
43  
44  
45  
46

**Supplementary Table 1: CBCL internalising symptom model predictors using multiple imputation**

|                                             | <b>B [95%CI]</b>     | <b>p</b> | <b>f<sup>2</sup></b> |
|---------------------------------------------|----------------------|----------|----------------------|
| <b>Maternal EPDS</b>                        | 0.22 [0.08, 0.36]    | .003 **  | 0.03                 |
| <b>Maternal BMI</b>                         | -0.04 [-0.13, 0.06]  | .436     | -                    |
| <b>Multiple pregnancy</b>                   | 0.58 [-1.10, 2.27]   | .497     | -                    |
| <b>Parity</b>                               |                      |          |                      |
| <b>1</b>                                    | -0.37 [-1.41, 0.67]  | .487     | -                    |
| <b>2</b>                                    | -1.33 [-3.09, 0.42]  | .136     | -                    |
| <b>3+</b>                                   | 0.64 [-1.34, 2.62]   | .524     | -                    |
| <b>IMD rank</b>                             | -0.41 [-0.91, 0.10]  | .115     | -                    |
| <b>Gestational age at birth (weeks)</b>     | 0.22 [-0.00, 0.44]   | .053     | -                    |
| <b>Birthweight (kg)</b>                     | -0.97 [-1.90, -0.05] | .038 *   | 0.005                |
| <b>Sex: female</b>                          | -0.51 [-1.35, 0.33]  | .232     | -                    |
| <b>Corrected age at assessment (months)</b> | 0.02 [-0.41, 0.45]   | .923     | -                    |
| <b>Cognition</b>                            | -0.05 [-0.10, -0.01] | .016 *   | 0.01                 |

p<0.05 \*; p<0.01 \*\*; p<0.001 \*\*\*

Adjusted R<sup>2</sup> = 0.0566.

B = unstandardised coefficient.

Outcome variable = Child Behaviour Checklist internalising sub-score at 18 months. Maternal EPDS = maternal Edinburgh Postnatal Depression Scale score at term-corrected age. Multiple pregnancy = dummy variable of twin/triplet pregnancy. Parity = dummy variable, one/two/three+ previous child(ren). Corrected age at assessment (months) = age at behavioural assessment, corrected for gestational age. Cognition = infant Bayley III score at 18 months.

Effect size (Cohen's f<sup>2</sup>, calculated from squared part correlations for predictors significant to 0.05): 0.02 = small, 0.15 = medium and 0.35 = large.<sup>1</sup>

- indicates data not given, as predictor not significant to 0.05.

**Supplementary Table 2: CBCL externalising symptom model predictors using multiple imputation**

|                                             | <b>B [95%CI]</b>     | <b>p</b>  | <b>f<sup>2</sup></b> |
|---------------------------------------------|----------------------|-----------|----------------------|
| <b>Maternal EPDS</b>                        | 0.40 [0.20, 0.61]    | <.001 *** | 0.05                 |
| <b>Maternal BMI</b>                         | 0.01 [-0.17, 0.15]   | .933      | -                    |
| <b>Multiple pregnancy</b>                   | 2.51 [-0.29, 5.31]   | .079      | -                    |
| <b>Parity</b>                               |                      |           |                      |
| <b>1</b>                                    | -1.06 [-2.53, 0.42]  | .160      | -                    |
| <b>2</b>                                    | -0.61 [-3.55, 2.33]  | .682      | -                    |
| <b>3+</b>                                   | -0.96 [-4.47, 2.56]  | .593      | -                    |
| <b>IMD rank</b>                             | -0.24 [-1.11, 0.63]  | .585      | -                    |
| <b>Gestational age at birth (weeks)</b>     | -0.07 [-0.40, 0.27]  | .701      | -                    |
| <b>Birthweight (kg)</b>                     | 1.03 [-0.38, 2.44]   | .153      | -                    |
| <b>Sex: female</b>                          | -1.80 [-3.07, -0.53] | .006 **   | 0.06                 |
| <b>Corrected age at assessment (months)</b> | -0.40 [-0.95, 0.16]  | .161      | -                    |
| <b>Cognition</b>                            | 0.03 [-0.03, 0.10]   | .322      | -                    |

p<0.05 \*; p<0.01 \*\*; p<0.001 \*\*\*

Adjusted R<sup>2</sup> = 0.0612.

B = unstandardised coefficient.

Outcome variable = Child Behaviour Checklist externalising sub-score at 18 months. Maternal EPDS = maternal Edinburgh Postnatal Depression Scale score at term-corrected age. Multiple pregnancy = dummy variable of twin/triplet pregnancy. Parity = dummy variable, one/two/three+ previous child(ren). Corrected age at assessment (months) = age at behavioural assessment, corrected for gestational age. Cognition = infant Bayley III score at 18 months.

Effect size (Cohen's f<sup>2</sup>, calculated from squared part correlations for predictors significant to 0.05): 0.02 = small, 0.15 = medium and 0.35 = large.<sup>1</sup>

- indicates data not given, as predictor not significant to 0.05.

**Supplementary Table 3:** CBCL and Q-CHAT model predictors using complete case analysis without interaction.

|                                             | CBCL                 |         | Q-CHAT               |           |
|---------------------------------------------|----------------------|---------|----------------------|-----------|
|                                             | B [95%CI]            | p       | B [95%CI]            | p         |
| <b>Maternal EPDS</b>                        | 0.88 [0.35, 1.41]    | .001 ** | 0.21 [-0.02, 0.44]   | .069      |
| <b>Maternal BMI</b>                         | -0.01 [-0.38, 0.37]  | .963    | 0.01 [-0.16, 0.17]   | .930      |
| <b>Multiple pregnancy</b>                   | 1.50 [-6.87, 9.87]   | .724    | 0.43 [-2.50, 3.37]   | .772      |
| <b>Parity</b>                               |                      |         |                      |           |
| <b>1</b>                                    | -2.83 [-6.60, 0.94]  | .141    | -1.54 [-3.41, 0.34]  | .108      |
| <b>2</b>                                    | -3.49 [-10.3, 3.35]  | .316    | 0.13 [-2.85, 3.10]   | .933      |
| <b>3+</b>                                   | -1.38 [-10.0, 7.30]  | .755    | -1.43 [-4.50, 1.64]  | .360      |
| <b>IMD rank</b>                             | -1.44 [-3.56, 0.67]  | .181    | -1.75 [-2.70, -0.79] | <.001 *** |
| <b>Gestational age at birth (weeks)</b>     | 0.01 [-0.90, 0.91]   | .987    | 0.10 [-0.33, 0.54]   | .639      |
| <b>Birthweight (kg)</b>                     | -0.65 [-4.38, 3.08]  | .733    | -1.81 [-3.63, 0.00]  | .050      |
| <b>Sex: female</b>                          | -4.57 [-7.82, -1.31] | .006 ** | -2.12 [-3.60, -0.64] | .005 **   |
| <b>Corrected age at assessment (months)</b> | -0.84 [-2.26, 0.59]  | .247    | -0.41 [-1.18, 0.35]  | .290      |
| <b>Cognition</b>                            | -0.03 [-0.20, 0.13]  | .689    | -0.23 [-0.30, -0.15] | <.001 *** |

p<0.05 \*; p<0.01 \*\*; p<0.001 \*\*\*

CBCL adjusted  $R^2 = 0.0862$ . Q-CHAT adjusted  $R^2 = 0.2103$ .

B = unstandardised coefficient.

CBCL = Child Behaviour Checklist externalising sub-score at 18 months. Q-CHAT = Quantitative Checklist for Autism in Toddlers score at 18 months. Maternal EPDS = maternal Edinburgh Postnatal Depression Scale score at term-corrected age. Multiple pregnancy = dummy variable of twin/triplet pregnancy. Parity = dummy variable, one/two/three+ previous child(ren). Gestation (weeks) = dummy variable: 34-36+6 weeks and  $\geq 37$  weeks gestation at birth. Corrected age at assessment (months) = age at behavioural assessment, corrected for gestational age. Cognition = infant Bayley III score at 18 months.



**Supplementary Table 4: EPDS score predictors**

|                           | <b>IRR [95%CI]</b> | <b>p</b> |
|---------------------------|--------------------|----------|
| <b>Time-lag (weeks)</b>   | 1.01 [0.97, 1.05]  | .647     |
| <b>Gestation:term</b>     | 0.91 [0.64, 1.31]  | .627     |
| <b>IMD rank</b>           | 1.00 [1.00, 1.00]  | .103     |
| <b>Multiple pregnancy</b> | 0.66 [0.46, 0.96]  | .031 *   |
| <b>Parity</b>             |                    |          |
| <b>1</b>                  | 0.79 [0.66, 0.95]  | .011 *   |
| <b>2</b>                  | 0.87 [0.60, 1.28]  | .491     |
| <b>3+</b>                 | 0.84 [0.54, 1.31]  | .445     |
| <b>Birthweight (kg)</b>   | 0.98 [0.83, 1.17]  | .847     |
| <b>Sex:female</b>         | 1.13 [0.98, 1.31]  | .098     |

p<0.05 \*; p<0.01 \*\*; p<0.001 \*\*\*

Pseudo R<sup>2</sup> = 0.0228

IRR = incidence rate ratio

Outcome variable = maternal Edinburgh Postnatal Depression Scale (EPDS) score at term-corrected age. Time-lag (weeks) = time in weeks between birth and EPDS assessment. Gestation:term = dummy variable, term (≥37 weeks) vs preterm (<37 weeks) gestation at birth. Multiple pregnancy = dummy variable of twin/triplet pregnancy. Parity = dummy variable, one/two/three+ previous child(ren).

**Supplementary Table 5:** EPDS score predictors including interaction ‘term x time-lag’

|                                | <b>IRR [95%CI]</b> | <b>p</b> |
|--------------------------------|--------------------|----------|
| <b>Time-lag (weeks)</b>        | 1.00 [0.97, 1.04]  | .823     |
| <b>Gestation: term</b>         | 0.88 [0.58, 1.34]  | .553     |
| <b>IMD rank</b>                | 1.00 [1.00, 1.00]  | .104     |
| <b>Multiple pregnancy</b>      | 0.66 [0.46, 0.96]  | .029 *   |
| <b>Parity</b>                  |                    |          |
| <b>1</b>                       | 0.79 [0.66, 0.95]  | .010 *   |
| <b>2</b>                       | 0.87 [0.60, 1.28]  | .480     |
| <b>3+</b>                      | 0.85 [0.55, 1.31]  | .458     |
| <b>Birthweight (kg)</b>        | 0.97 [0.83, 1.15]  | .756     |
| <b>Sex:female</b>              | 1.13 [0.98, 1.30]  | .100     |
| <b>Term x time-lag (weeks)</b> | 1.01 [0.94, 1.10]  | .735     |

p<0.05 \*; p<0.01 \*\*; p<0.001 \*\*\*

Pseudo R<sup>2</sup> = 0.0230

IRR = incidence rate ratio

Outcome variable = maternal Edinburgh Postnatal Depression Scale (EPDS) score at term-corrected age. Time-lag (weeks) = time in weeks between birth and EPDS assessment. Gestation: term = dummy variable, term (≥37 weeks) vs preterm (<37 weeks) gestation at birth. Multiple pregnancy = dummy variable of twin/triplet pregnancy. Parity = dummy variable, one/two/three+ previous child(ren). Term x time-lag (weeks): interaction term between term gestation at birth and time-lag between birth and maternal EPDS assessment.

1  
2  
3 **Supplemental reference list**  
4

- 5 1. Cohen J. *Statistical Power Analysis for the Behavioral Sciences*. 2nd ed. L. Erlbaum Associates; 1988.  
6  
7  
8  
9  
10  
11  
12  
13  
14  
15  
16  
17  
18  
19  
20  
21  
22  
23  
24  
25  
26  
27  
28  
29  
30  
31  
32  
33  
34  
35  
36  
37  
38  
39  
40  
41  
42  
43  
44  
45  
46

For peer review only

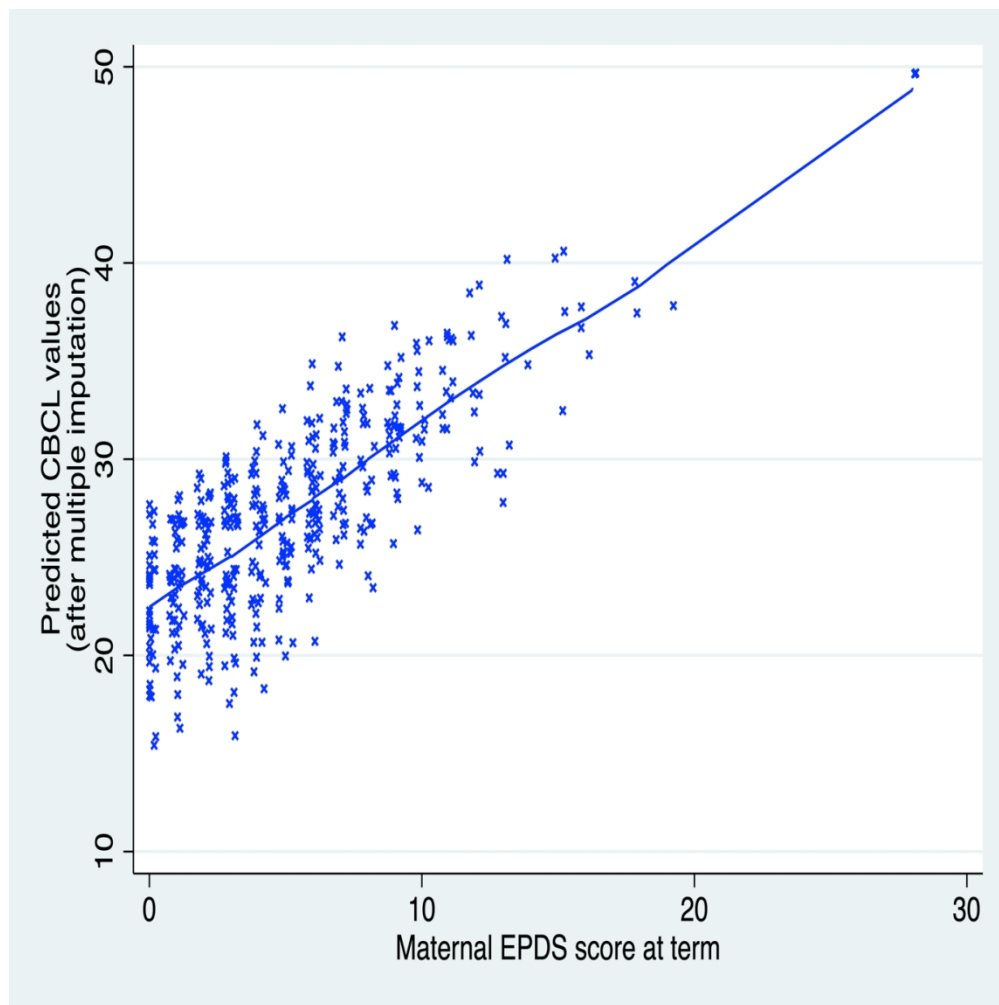

Fig.1 Children’s predicted CBCL scores at 18 months are positively correlated to the maternal EPDS score at term-equivalent age

158x158mm (220 x 220 DPI)

1  
2  
3  
4  
5  
6  
7  
8  
9  
10  
11  
12  
13  
14  
15  
16  
17  
18  
19  
20  
21  
22  
23  
24  
25  
26  
27  
28  
29  
30  
31  
32  
33  
34  
35  
36  
37  
38  
39  
40  
41  
42  
43  
44  
45  
46  
47  
48  
49  
50  
51  
52  
53  
54  
55  
56  
57  
58  
59  
60

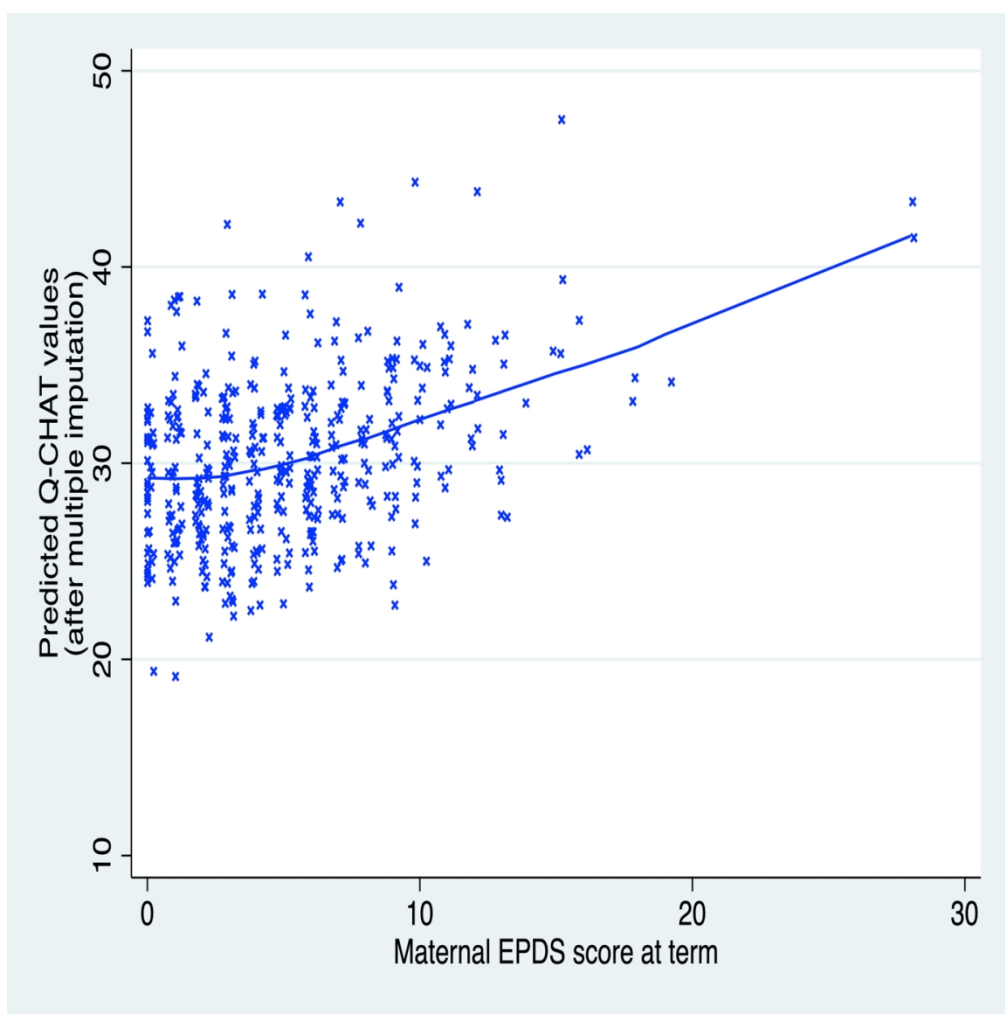

Fig.2 Children’s predicted Q-CHAT scores at 18 months are positively correlated to the maternal EPDS score at term-equivalent age.

158x158mm (220 x 220 DPI)

STROBE Statement—Checklist of items that should be included in reports of *cohort studies*

|                              | Item No | Recommendation                                                                                                                                                                                                                                                                                                         | Page No |
|------------------------------|---------|------------------------------------------------------------------------------------------------------------------------------------------------------------------------------------------------------------------------------------------------------------------------------------------------------------------------|---------|
| <b>Title and abstract</b>    | 1       | (a) Indicate the study's design with a commonly used term in the title or the abstract<br>(b) Provide in the abstract an informative and balanced summary of what was done and what was found                                                                                                                          | 1, 2    |
| <b>Introduction</b>          |         |                                                                                                                                                                                                                                                                                                                        |         |
| Background/rationale         | 2       | Explain the scientific background and rationale for the investigation being reported                                                                                                                                                                                                                                   | 5       |
| Objectives                   | 3       | State specific objectives, including any prespecified hypotheses                                                                                                                                                                                                                                                       | 6       |
| <b>Methods</b>               |         |                                                                                                                                                                                                                                                                                                                        |         |
| Study design                 | 4       | Present key elements of study design early in the paper                                                                                                                                                                                                                                                                | 6       |
| Setting                      | 5       | Describe the setting, locations, and relevant dates, including periods of recruitment, exposure, follow-up, and data collection                                                                                                                                                                                        | 6       |
| Participants                 | 6       | (a) Give the eligibility criteria, and the sources and methods of selection of participants. Describe methods of follow-up<br>(b) For matched studies, give matching criteria and number of exposed and unexposed                                                                                                      | 6       |
| Variables                    | 7       | Clearly define all outcomes, exposures, predictors, potential confounders, and effect modifiers. Give diagnostic criteria, if applicable                                                                                                                                                                               | 6, 7    |
| Data sources/<br>measurement | 8*      | For each variable of interest, give sources of data and details of methods of assessment (measurement). Describe comparability of assessment methods if there is more than one group                                                                                                                                   | 7       |
| Bias                         | 9       | Describe any efforts to address potential sources of bias                                                                                                                                                                                                                                                              | 8       |
| Study size                   | 10      | Explain how the study size was arrived at                                                                                                                                                                                                                                                                              | 6       |
| Quantitative variables       | 11      | Explain how quantitative variables were handled in the analyses. If applicable, describe which groupings were chosen and why                                                                                                                                                                                           | 8       |
| Statistical methods          | 12      | (a) Describe all statistical methods, including those used to control for confounding<br>(b) Describe any methods used to examine subgroups and interactions<br>(c) Explain how missing data were addressed<br>(d) If applicable, explain how loss to follow-up was addressed<br>(e) Describe any sensitivity analyses | 8, 9    |
| <b>Results</b>               |         |                                                                                                                                                                                                                                                                                                                        |         |
| Participants                 | 13*     | (a) Report numbers of individuals at each stage of study—eg numbers potentially eligible, examined for eligibility, confirmed eligible, included in the study, completing follow-up, and analysed<br>(b) Give reasons for non-participation at each stage<br>(c) Consider use of a flow diagram                        | 10      |
| Descriptive data             | 14*     | (a) Give characteristics of study participants (eg demographic, clinical, social) and information on exposures and potential confounders<br>(b) Indicate number of participants with missing data for each variable of interest<br>(c) Summarise follow-up time (eg, average and total amount)                         | 10      |
| Outcome data                 | 15*     | Report numbers of outcome events or summary measures over time                                                                                                                                                                                                                                                         | 10      |

|    |                          |    |                                                                                                                                                                                                              |        |
|----|--------------------------|----|--------------------------------------------------------------------------------------------------------------------------------------------------------------------------------------------------------------|--------|
| 1  | Main results             | 16 | (a) Give unadjusted estimates and, if applicable, confounder-adjusted estimates and their precision (eg, 95% confidence interval). Make clear which confounders were adjusted for and why they were included | 10     |
| 2  |                          |    | (b) Report category boundaries when continuous variables were categorized                                                                                                                                    |        |
| 3  |                          |    | (c) If relevant, consider translating estimates of relative risk into absolute risk for a meaningful time period                                                                                             |        |
| 4  |                          |    |                                                                                                                                                                                                              |        |
| 5  | Other analyses           | 17 | Report other analyses done—eg analyses of subgroups and interactions, and sensitivity analyses                                                                                                               | 10, 11 |
| 6  | <b>Discussion</b>        |    |                                                                                                                                                                                                              |        |
| 7  | Key results              | 18 | Summarise key results with reference to study objectives                                                                                                                                                     | 11     |
| 8  | Limitations              | 19 | Discuss limitations of the study, taking into account sources of potential bias or imprecision. Discuss both direction and magnitude of any potential bias                                                   | 13, 14 |
| 9  | Interpretation           | 20 | Give a cautious overall interpretation of results considering objectives, limitations, multiplicity of analyses, results from similar studies, and other relevant evidence                                   | 14, 15 |
| 10 | Generalisability         | 21 | Discuss the generalisability (external validity) of the study results                                                                                                                                        | 14     |
| 11 | <b>Other information</b> |    |                                                                                                                                                                                                              |        |
| 12 | Funding                  | 22 | Give the source of funding and the role of the funders for the present study and, if applicable, for the original study on which the present article is based                                                | 3      |

\*Give information separately for exposed and unexposed groups.

**Note:** An Explanation and Elaboration article discusses each checklist item and gives methodological background and published examples of transparent reporting. The STROBE checklist is best used in conjunction with this article (freely available on the Web sites of PLoS Medicine at <http://www.plosmedicine.org/>, Annals of Internal Medicine at <http://www.annals.org/>, and Epidemiology at <http://www.epidem.com/>). Information on the STROBE Initiative is available at <http://www.strobe-statement.org>.

# BMJ Open

## Postnatal maternal depressive symptoms and behavioural outcomes in term- and preterm-born toddlers: a longitudinal UK community cohort study.

|                                 |                                                                                                                                                                                                                                                                                                                                                                                                                                                                                                                                                                                                                                                                                                                                                                                                                                                                                                                                                                                                                                                                                                                                                                                                                                                                                                                                                                                                                                                                                                                                                                                                                                                                                                                                                                                      |
|---------------------------------|--------------------------------------------------------------------------------------------------------------------------------------------------------------------------------------------------------------------------------------------------------------------------------------------------------------------------------------------------------------------------------------------------------------------------------------------------------------------------------------------------------------------------------------------------------------------------------------------------------------------------------------------------------------------------------------------------------------------------------------------------------------------------------------------------------------------------------------------------------------------------------------------------------------------------------------------------------------------------------------------------------------------------------------------------------------------------------------------------------------------------------------------------------------------------------------------------------------------------------------------------------------------------------------------------------------------------------------------------------------------------------------------------------------------------------------------------------------------------------------------------------------------------------------------------------------------------------------------------------------------------------------------------------------------------------------------------------------------------------------------------------------------------------------|
| Journal:                        | <i>BMJ Open</i>                                                                                                                                                                                                                                                                                                                                                                                                                                                                                                                                                                                                                                                                                                                                                                                                                                                                                                                                                                                                                                                                                                                                                                                                                                                                                                                                                                                                                                                                                                                                                                                                                                                                                                                                                                      |
| Manuscript ID                   | bmjopen-2021-058540.R1                                                                                                                                                                                                                                                                                                                                                                                                                                                                                                                                                                                                                                                                                                                                                                                                                                                                                                                                                                                                                                                                                                                                                                                                                                                                                                                                                                                                                                                                                                                                                                                                                                                                                                                                                               |
| Article Type:                   | Original research                                                                                                                                                                                                                                                                                                                                                                                                                                                                                                                                                                                                                                                                                                                                                                                                                                                                                                                                                                                                                                                                                                                                                                                                                                                                                                                                                                                                                                                                                                                                                                                                                                                                                                                                                                    |
| Date Submitted by the Author:   | 19-Feb-2022                                                                                                                                                                                                                                                                                                                                                                                                                                                                                                                                                                                                                                                                                                                                                                                                                                                                                                                                                                                                                                                                                                                                                                                                                                                                                                                                                                                                                                                                                                                                                                                                                                                                                                                                                                          |
| Complete List of Authors:       | <p>Kleine, Ira; King's College London, Centre for the Developing Brain, School of Bioengineering and Imaging Sciences, Faculty of Life Sciences &amp; Medicine</p> <p>Vamvakas, George; King's College London, Department of Biostatistics and Health Informatics, Institute of Psychiatry, Psychology and Neuroscience</p> <p>Lautarescu, Alexandra; King's College London, Centre for the Developing Brain, School of Bioengineering and Imaging Sciences, Faculty of Life Sciences &amp; Medicine; King's College London, Forensic and Neurodevelopmental Sciences, Institute of Psychiatry, Psychology and Neuroscience</p> <p>Falconer, Shona; King's College London, Centre for the Developing Brain, School of Bioengineering and Imaging Sciences, Faculty of Life Sciences &amp; Medicine</p> <p>Chew, Andrew; King's College London, Centre for the Developing Brain, School of Bioengineering and Imaging Sciences, Faculty of Life Sciences &amp; Medicine</p> <p>Counsell, Serena ; King's College London, Centre for the Developing Brain, School of Bioengineering and Imaging Sciences, Faculty of Life Sciences &amp; Medicine</p> <p>Pickles, Andrew; King's College London, Department of Biostatistics and Health Informatics, Institute of Psychiatry, Psychology and Neuroscience</p> <p>Edwards, David; King's College London, Centre for the Developing Brain, School of Bioengineering and Imaging Sciences, Faculty of Life Sciences &amp; Medicine</p> <p>Nosarti, Chiara; King's College London, Centre for the Developing Brain, School of Bioengineering and Imaging Sciences, Faculty of Life Sciences &amp; Medicine; King's College London, Department of Child and Adolescent Psychiatry, Institute of Psychiatry, Psychology and Neuroscience</p> |
| <b>Primary Subject Heading</b>: | Mental health                                                                                                                                                                                                                                                                                                                                                                                                                                                                                                                                                                                                                                                                                                                                                                                                                                                                                                                                                                                                                                                                                                                                                                                                                                                                                                                                                                                                                                                                                                                                                                                                                                                                                                                                                                        |
| Secondary Subject Heading:      | Paediatrics                                                                                                                                                                                                                                                                                                                                                                                                                                                                                                                                                                                                                                                                                                                                                                                                                                                                                                                                                                                                                                                                                                                                                                                                                                                                                                                                                                                                                                                                                                                                                                                                                                                                                                                                                                          |
| Keywords:                       | MENTAL HEALTH, Child & adolescent psychiatry < PSYCHIATRY, Developmental neurology & neurodisability < PAEDIATRICS, Depression & mood disorders < PSYCHIATRY, NEONATOLOGY                                                                                                                                                                                                                                                                                                                                                                                                                                                                                                                                                                                                                                                                                                                                                                                                                                                                                                                                                                                                                                                                                                                                                                                                                                                                                                                                                                                                                                                                                                                                                                                                            |



1  
2  
3  
4  
5  
6  
7  
8  
9  
10  
11  
12  
13  
14  
15  
16  
17  
18  
19  
20  
21  
22  
23  
24  
25  
26  
27  
28  
29  
30  
31  
32  
33  
34  
35  
36  
37  
38  
39  
40  
41  
42  
43  
44  
45  
46  
47  
48  
49  
50  
51  
52  
53  
54  
55  
56  
57  
58  
59  
60

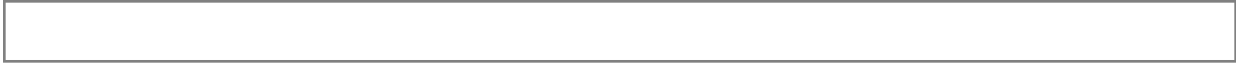

SCHOLARONE™  
Manuscripts

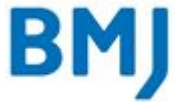

I, the Submitting Author has the right to grant and does grant on behalf of all authors of the Work (as defined in the below author licence), an exclusive licence and/or a non-exclusive licence for contributions from authors who are: i) UK Crown employees; ii) where BMJ has agreed a CC-BY licence shall apply, and/or iii) in accordance with the terms applicable for US Federal Government officers or employees acting as part of their official duties; on a worldwide, perpetual, irrevocable, royalty-free basis to BMJ Publishing Group Ltd ("BMJ") its licensees and where the relevant Journal is co-owned by BMJ to the co-owners of the Journal, to publish the Work in this journal and any other BMJ products and to exploit all rights, as set out in our [licence](#).

The Submitting Author accepts and understands that any supply made under these terms is made by BMJ to the Submitting Author unless you are acting as an employee on behalf of your employer or a postgraduate student of an affiliated institution which is paying any applicable article publishing charge ("APC") for Open Access articles. Where the Submitting Author wishes to make the Work available on an Open Access basis (and intends to pay the relevant APC), the terms of reuse of such Open Access shall be governed by a Creative Commons licence – details of these licences and which [Creative Commons](#) licence will apply to this Work are set out in our licence referred to above.

Other than as permitted in any relevant BMJ Author's Self Archiving Policies, I confirm this Work has not been accepted for publication elsewhere, is not being considered for publication elsewhere and does not duplicate material already published. I confirm all authors consent to publication of this Work and authorise the granting of this licence.

1  
2  
3 **Postnatal maternal depressive symptoms and behavioural outcomes in term- and**  
4 **preterm-born toddlers: a longitudinal UK community cohort study.**  
5

6 Kleine, I<sup>a</sup> (MBBS); Vamvakas, G<sup>b</sup> (MSc); Lautarescu A<sup>a,c</sup> (MPhil); Falconer, S<sup>a</sup> (PhD); Chew  
7 A<sup>a</sup> (MD); Counsell SJ<sup>a</sup> (PhD); Pickles, A<sup>b</sup> (FMedSci); Edwards, AD<sup>a</sup> (FMedSci); Nosarti, C<sup>a,d</sup>  
8 (PhD).  
9  
10  
11  
12

13 <sup>a</sup> Centre for the Developing Brain, School of Bioengineering and Imaging Sciences, Faculty  
14 of Life Sciences & Medicine, King's College London, St Thomas' Hospital, London SE1  
15 7EH, UK.  
16  
17

18 <sup>b</sup> Department of Biostatistics and Health Informatics, Institute of Psychiatry, Psychology and  
19 Neuroscience, King's College London, London SE5 8AF, UK.  
20  
21

22 <sup>c</sup> Forensic and Neurodevelopmental Sciences, Institute of Psychiatry, Psychology and  
23 Neuroscience, King's College London, London SE5 8AF, UK.  
24  
25

26 <sup>d</sup> Department of Child and Adolescent Psychiatry, Institute of Psychiatry, Psychology and  
27 Neuroscience, King's College London, London SE5 8AF, UK.  
28  
29

30  
31 **Post-publication corresponding author's contact information**

32 Prof Chiara Nosarti

33 Centre for the Developing Brain, School of Bioengineering and Imaging Sciences

34 King's College London

35 St Thomas' Hospital

36 London

37 SE1 7EH

38 UK

39 chiara.nosarti@kcl.ac.uk

40 +44 (0)207 848 0133  
41  
42  
43  
44  
45  
46  
47  
48  
49  
50  
51  
52  
53  
54  
55  
56  
57  
58  
59  
60

## **Abstract**

**Objectives:** To examine the association between maternal depressive symptoms in the immediate postnatal period and offspring's behavioural outcomes in a large cohort of term- and preterm-born toddlers.

**Design and Participants:** Data were drawn from the Developing Human Connectome Project. Maternal postnatal depressive symptoms were assessed at term-equivalent age, and children's outcomes were evaluated at a median corrected age of 18.4 months (range 17.3 – 24.3).

**Exposure and outcomes:** Preterm birth was defined as <37 weeks completed gestation. Maternal depressive symptoms were assessed with the Edinburgh Postnatal Depression Scale (EPDS). Toddlers' outcome measures were parent-rated Child Behaviour Checklist 1<sup>1/2</sup>-5 Total (CBCL) and Quantitative Checklist for Autism in Toddlers (Q-CHAT) scores. Toddlers' cognition was assessed with the Bayley Scales of Infant and Toddler Development – Third Edition (Bayley-III).

**Results:** Higher maternal EPDS scores were associated with toddlers' higher CBCL (B=0.93, 95% CI 0.43-1.44, p<0.001, f<sup>2</sup>=0.05) and Q-CHAT scores (B=0.27, 95% CI 0.03-0.52, p=.031, f<sup>2</sup>=0.01). Higher maternal EPDS scores were not associated with toddlers' cognitive outcomes. Maternal EPDS, toddlers' CBCL and Q-CHAT scores did not differ between preterm (n=97; 19.1% of the total sample) and term participants.

**Conclusions:** Our findings indicate that children whose mothers reported increased depressive symptoms in the early postnatal period, including subclinical symptoms, exhibit more parent-reported behavioural problems in toddlerhood. These associations were independent of gestational age. Further research is needed to confirm the clinical significance of these findings.

### **Strengths and limitations of this study**

- Prospective study with a large sample, using multiple imputation to reduce non-response bias.
- Maternal depressive symptoms assessed as a continuous variable, providing more nuanced information about the significance of subclinical symptoms.
- Maternal depressive symptoms assessed earlier than in previous studies, enabling recognition of early screening opportunities for families.
- Potential common method variance bias through parent-completed child behavioural assessments.
- Unknown paternal and parental factors, such as comorbid psychiatric conditions, that may confound our findings.

### **Keywords**

Postpartum Depression; Child Development; Autism; Mental Health; Child Behavior; Mood Disorder; Preterm Birth.

### **Declarations**

#### **Funding**

The DHCP project was funded by the European Research Council under the European Union Seventh Framework Programme (FR/2007-2013)/ERC Grant Agreement no. 319456. The authors acknowledge infrastructure support from the National Institute for Health Research Mental Health Biomedical Research Centre at South London, Maudsley NHS Foundation Trust, King's College London, the National Institute for Health Research Mental Health Biomedical Research Centre at Guys, and St Thomas' Hospitals NHS Foundation Trust. The study was also supported in part by the Engineering and Physical Sciences Research Council / Wellcome Trust Centre for Medical Engineering at King's College London (grant WT 203148/Z/16/Z) and the Medical Research Council (UK) (grants MR/K006355/1 and MR/L011530/1) and the MRC Centre for Neurodevelopmental Disorders at King's College London. AP receives a NIHR SI award (NF-SI-0617-10120). AL is supported by the UK Medical Research Council (MR/N013700) and King's College London member of the MRC Doctoral Training Partnership in Biomedical Sciences. The views expressed are those of the authors and not necessarily those of the NHS, the NIHR, or the Department of Health and Social Care.

### **Conflict of interest / Competing interests**

ADE received financial support from the EU-AIMS-Trials (European Research Council under the European Union Seventh Framework Programme) as co-Principal Investigator.

ADE received consulting fees from Chiesi Farmaceutici (advice on neuroprotection in newborn infants) and Medtronix (unpaid participation in scientific advice committee). ADE has a patent on Xenon as an organ protectant (No P023708WO). ADE was Chair of the Data Monitoring and Ethics Committee for the Baby-Oscar Trial, and served on the Data Monitoring and Ethics Committee for the PAEN Trial.

There are no other relationships or activities that could appear to have influenced the submitted work.

### **Availability of data and material**

Research data are available upon reasonable request.

### **Code availability**

Not applicable.

### **Ethics approval**

This study was approved by the UK National Research Ethics Authority (14/LO/1169) and conducted in accordance with the World Medical Association's Code of Ethics (Declaration of Helsinki).

### **Consent to participate**

Written informed consent was given by children's carer(s) at recruitment into the study.

### **Consent for publication**

Not applicable.

## **Introduction**

Postnatal depression affects approximately 12% of mothers worldwide.<sup>1</sup> In contrast to ‘baby blues’, which is a state of emotional lability that affects between 13.7%-76.0% of women in the first few days after birth and typically resolves spontaneously within two weeks,<sup>2</sup> postnatal depression is more severe and starts in the first few months post-partum<sup>1</sup>. Stressful life events have been linked to a heightened risk of developing postnatal depression;<sup>3</sup> for example, mothers of preterm infants have a significantly higher risk of postpartum depression compared to mothers of term infants,<sup>4</sup> likely due to heightened stress associated with perinatal complications.<sup>5</sup>

Women with postnatal depression tend to be less responsive to their baby’s needs and to display less affection.<sup>6</sup> Therefore, in the short-term postpartum depression may affect mother-infant interactions<sup>7</sup> and in the long-term it may lead to alterations in brain development,<sup>8</sup> emotional difficulties,<sup>9</sup> less secure attachment, cognitive and behavioural problems in childhood, and a possible increased risk of autism spectrum disorder (ASD).<sup>10,11</sup> Large cohort studies, such as the Avon Longitudinal Study of Parents and Children (ALSPAC), have shown that these associations are even evident when maternal depression is measured on a continuum of symptoms rather than a dichotomous diagnosis,<sup>12-14</sup> supporting the notion that elevated sub-diagnostic psychiatric symptoms can also negatively impact on children’s development.<sup>15</sup>

Studies investigating the underlying causes that may link maternal postnatal depression to child outcomes have implicated several biological and environmental variables. For instance, genetic and epigenetic factors have been shown to both mediate and mitigate the intergenerational transmission of psychiatric disorders,<sup>16</sup> while lower quality parenting, interparental conflict, and socioeconomic deprivation have been shown to exacerbate children’s developmental risk of emotional and behavioural problems.<sup>11</sup> In addition, being born preterm (i.e. <37 weeks’ gestation) has been associated with alterations in early brain development,<sup>17</sup> as well as neurological, behavioural and cognitive problems in childhood and beyond.<sup>18,19</sup> Therefore, it is complex to disentangle the possible effects of postnatal maternal mental health and those of perinatal clinical factors on specific outcomes in preterm children, as these may involve both maternal psychosocial and biological variables, as well as child preterm-related neurodevelopmental morbidity.

1  
2  
3 Furthermore, a question that remains unanswered is whether preterm birth accentuates the  
4 association between maternal postnatal depression and child outcome. Two theoretical  
5 frameworks exist that hypothesise certain infants may be influenced differently by external  
6 stimuli: the diathesis stress model proposes that certain vulnerability factors make affected  
7 infants more prone to suboptimal environmental influences with subsequent poorer  
8 outcomes,<sup>20,21</sup> whereas the differential susceptibility model frames such factors as plasticity-  
9 mediating, thus leading to poorer outcomes in negative environments, as well as better  
10 outcomes in supportive environments.<sup>21,22</sup> Previous studies investigating differential  
11 susceptibility have shown mixed findings studying a range of environmental and clinical  
12 exposures,<sup>24,27</sup> with child outcomes including attachment, internalising and externalising  
13 behaviour, and academic competence.<sup>27</sup> Both low birthweight in term infants (small for  
14 gestational age)<sup>23</sup> and preterm birth<sup>22,24,25</sup> have been explored as distinct potential  
15 susceptibility factors, as the pathophysiological mechanisms underlying their respective  
16 differential susceptibility effects may differ.<sup>26</sup>

17  
18  
19  
20  
21  
22  
23  
24  
25  
26  
27  
28  
29 Given that mothers of preterm children experience elevated levels of distress,<sup>28</sup> are at high  
30 risk of developing postnatal depression,<sup>29</sup> and that preterm children themselves are vulnerable  
31 to psychiatric sequelae,<sup>30</sup> we aimed to investigate the association between very early  
32 symptoms of maternal postnatal depression and child behavioural and emotional outcomes,  
33 including ASD symptoms. No studies to date have investigated the interactive effect of  
34 preterm birth and maternal depression on outcomes, hence we also aimed to explore whether  
35 maternal depression had a differential effect on term and preterm children's behavioural  
36 outcomes. We specifically aimed to investigate the continuum of maternal depressive  
37 symptoms rather than solely focussing on clinically significant maternal depression, so as to  
38 provide more nuanced information about the importance of subclinical depressive symptoms  
39 on child outcomes. We hypothesised that early postnatal maternal depressive symptoms  
40 would be more elevated in mothers of preterm compared to term infants and that these would  
41 impact preterm children's behavioural and emotional outcomes to a greater degree than their  
42 term counterparts.

## 54 55 **Methods**

### 56 **Sample**

57  
58 Participants were enrolled in the Developing Human Connectome Project (DHCP,  
59 <http://www.developingconnectome.org/>), a neuroimaging-focused project, with eligibility  
60



1  
2  
3 criteria including pregnant women (aged  $\geq 16$  years) with a gestational age of 20–42 weeks,  
4 and newborn infants aged 24–44 weeks; infants enrolled in the DHCP had magnetic  
5 resonance imaging (MRI) at term-equivalent age. Exclusion criteria for the DHCP included:  
6  
7  
8 contraindications to MRI, babies being too unwell to tolerate a scan, and language difficulties  
9 preventing informed consent.<sup>31</sup> Toddlers were invited to the Centre for the Developing Brain,  
10 St Thomas' Hospital, London, for neurodevelopmental assessment at 18 months post-  
11  
12 expected delivery date; appointments were made according to family availability as close as  
13 possible to this time-point. Inclusion criteria for our follow-up study were: mother and baby  
14 attendance for MRI at term-equivalent age; completed toddler neurodevelopmental  
15 assessment. These inclusion criteria were met by 509 toddlers by the date of closure for this  
16 analysis (26/02/2020). Of the 509 toddlers, 51 were one of a twin pregnancy, and three were  
17 one of a triplet pregnancy; the sample contained 22 sibling pairs and one set of triplets. This  
18 study was approved by the UK National Research Ethics Authority (14/LO/1169) and  
19 conducted in accordance with the World Medical Association's Code of Ethics (Declaration  
20 of Helsinki). Written informed consent was given by children's carer(s) at recruitment into  
21 the study.  
22  
23  
24  
25  
26  
27  
28  
29  
30  
31

### 32 Maternal variables

34 Maternal age, parity, Body Mass Index (BMI) and postcode were collected at enrolment into  
35 the DHCP study. Parity was coded as 0, 1, 2, or  $\geq 3$  previous children. Index of Multiple  
36 Deprivation (IMD) rank was computed from the current maternal postcode using the 2019  
37 IMD classification; it combines locality-specific information about income, employment,  
38  
39 IMD classification; it combines locality-specific information about income, employment,  
40 education, health, crime, housing and living environment, thus providing a proxy for family  
41 socioeconomic status.<sup>32</sup> Lower IMD rank corresponds to greater social deprivation.  
42  
43  
44  
45

46 *Maternal depressive symptoms* were measured using the Edinburgh Postnatal Depression  
47 Scale (EPDS)<sup>33</sup> on the day of infant's MRI at term-equivalent age. Mothers of infants born at  
48 term were tested in the first few weeks postnatally, whereas mothers of preterm-born infants  
49 were tested once they reached term-corrected age. The EPDS is a 10-item screening  
50 questionnaire completed by mothers, with higher scores reflecting a higher likelihood of  
51 depressive disorders. A score of 13 can be used as a cut-off indicating high-level symptoms,  
52 although a cut-off of 11 maximises the sensitivity and specificity of the screening tool for  
53 depression.<sup>34</sup> Mothers completed the EPDS independently in a private room in our Centre,  
54  
55 with no interaction with the researcher. Participants were informed that the results would be  
56  
57  
58  
59  
60

1  
2  
3 discussed with them, and consented to information being shared with their General  
4 Practitioner in the case of high scores. The EPDS questionnaire was scored by a member of  
5 the DHCP team.<sup>31</sup>  
6  
7  
8  
9

### 10 Child variables

11 Infant *clinical characteristics* were gathered from clinical notes where available, or from  
12 maternal report, and included: sex, gestational age at birth, birth weight, and pregnancy size  
13 (singleton/twin/triplet).  
14  
15  
16

17  
18 *Behavioural outcomes* were assessed using the Child Behaviour Checklist/1<sup>1/2</sup>-5 (CBCL), a  
19 parent-completed 100-item questionnaire, in which the parent rates the child's behaviour over  
20 the preceding two months using a 3-point Likert scale ("not true", "somewhat or sometimes  
21 true", and "very true or often true"). Responses are categorised into syndrome profiles, and  
22 these are subsequently grouped into internalising (emotional reactivity, anxiety/depression,  
23 somatic complaints, and withdrawal), externalising (attention problems, aggressive  
24 behaviour) and total (internalising, externalising, sleep and other) problem scales. Higher  
25 scores indicate increased emotional and behavioural problems. Total scores are classified into  
26 a normal range (<83<sup>rd</sup> centile, T <60), borderline range (83<sup>rd</sup>-90<sup>th</sup> centile, T 60-63), and  
27 clinical range (>90<sup>th</sup> centile, T ≥64).<sup>35</sup> The CBCL is known to have high reliability, validity  
28 and cross-informant agreement for measuring children's emotional and behavioural  
29 problems.<sup>35</sup>  
30  
31  
32  
33  
34  
35  
36  
37  
38  
39  
40

41 *ASD traits* were assessed using the Quantitative Checklist for Autism in Toddlers (Q-CHAT).  
42 The Q-CHAT is a parent-completed 25-item questionnaire, in which the child's behaviour is  
43 scored on a 5-point (0-4) frequency scale. Higher total scores correspond to a higher  
44 frequency of autistic traits. The Q-CHAT shows good test-retest reliability, face validity and  
45 specificity, yet poor positive predictive value.<sup>36,37</sup>  
46  
47  
48  
49  
50

51 *Cognitive assessment* was performed using the Bayley Scales of Infant and Toddler  
52 Development – Third Edition (Bayley-III). The Bayley-III provides scores for a child's  
53 overall cognitive, language and motor development. The cognitive standardised composite  
54 score was used in this study; scores between 70-84 indicate mild cognitive impairment,  
55 scores between 55-69 indicate moderate impairment, and scores lower than 55 indicate severe  
56  
57  
58  
59  
60

1  
2  
3 impairment<sup>38</sup>. Reliability and validity of the Bayley-III have been shown to be robust,<sup>39</sup>  
4 although some studies report its underestimation of developmental problems.<sup>40</sup>  
5  
6  
7

8 Assessments were carried out by staff experienced in the neurocognitive assessments of  
9 toddlers.  
10  
11  
12

### 13 Analysis

14 Descriptive statistics and one-way ANOVA tests were performed in IBM SPSS Statistics for  
15 Windows v.25. All other analyses were carried out in Stata v.16.  
16  
17  
18  
19

20 Multiple imputation (MI) was carried out to account for missing data in CBCL (11/509,  
21 2.24%), Q-CHAT (9/509, 1.8%), maternal EPDS (73/509, 14.3%), maternal BMI (27/509,  
22 5.3%) and IMD rank (3/509, 0.6%). Variables were imputed simultaneously using the ‘mi  
23 impute chained’ procedure that performs imputation by chained equations. The imputation  
24 models had the same structural form as the analysis models, and included all variables that  
25 appear in the corresponding analysis models (maternal EPDS, maternal BMI, multiple  
26 pregnancy, parity, IMD rank, gestational age at birth, birthweight, sex, corrected age at  
27 assessment, and Bayley III Cognitive Composite score); in addition, maternal age was also  
28 included in the imputation model, as this predicted the incomplete variable and the  
29 probability of a value being observed.<sup>41</sup> To assess whether maternal age was predicting the  
30 probability of a value being observed, we firstly constructed binary indicators, one for each  
31 incomplete variable, that denoted whether the incomplete variable was missing their value  
32 (coded 0) or not (coded 1). These indicators then formed the dependent variable in logistic  
33 regression models that used maternal age as the independent variable. We used a 5% level to  
34 define a significant association.  
35  
36  
37  
38  
39  
40  
41  
42  
43  
44  
45  
46  
47

48 Maternal EPDS and CBCL were imputed using Poisson regression; Q-CHAT, maternal BMI,  
49 and the IMD rank were imputed using linear regression. 40 MI datasets were created. To  
50 assess the stability of our MI parameters, we extracted the Monte Carlo error of each  
51 parameter estimate and examined whether the error for the coefficient was less than 10% of  
52 the parameter’s standard error estimate. MI estimates were used for the primary analyses and  
53 compared to the estimates from complete-case (CC, individuals who had no missing data pre-  
54 imputation) analyses. Normal probability plots of residuals from the CC analyses were  
55 examined.  
56  
57  
58  
59  
60

1  
2  
3  
4  
5 The analysis models were multiple linear regressions fitted using the ‘mi estimate’ procedure,  
6 which estimates effects after application of Rubin’s rules.<sup>42</sup> To account for the small amount  
7 of clustering in our data (twin/triplet siblings), the models’ standard errors were obtained  
8 using Stata’s robust cluster estimator ‘vce(cluster *idvar*)’. For continuous variables, Cohen’s  
9 f-squared effect sizes were calculated using  $f^2 = (R_{AB}^2 - R_A^2)/(1 - R_{AB}^2)$ , where  $R_{AB}^2$  is the R-  
10 squared value from a regression model that includes the variable of interest as well as all the  
11 covariates used in the model, and  $R_A^2$  is the R-squared value from the regression model that  
12 includes only the covariates.<sup>43,44</sup> For binary variables, Cohen’s f-squared effect sizes were  
13 produced after estimating first the Cohen’s d using the formula:  $f^2 = \frac{d}{2k}$ , where k is the  
14 number of groups. As a measure of dispersion, Cohen’s d used the average root mean-square  
15 error over the MI datasets. Adjusted R-squared values after MI were extracted after  
16 estimating the model with the user-written ‘mibeta’ command with the ‘fisherz’ option,<sup>45</sup>  
17 which calculates R-squared measures for linear regression with MI data. The significance of  
18 the joint effect of the categorical variable parity was assessed using ‘mi test’ which performs  
19 Wald tests of composite linear hypotheses.  
20  
21  
22  
23  
24  
25  
26  
27  
28  
29  
30  
31  
32  
33

34 *Primary outcome measures* were children’s total CBCL raw score and Q-CHAT score.

35 *Secondary outcome measures* were CBCL internalising and externalising scores. The effect  
36 of maternal EPDS score was adjusted for IMD rank, maternal age, maternal BMI, maternal  
37 parity, pregnancy size, and the following child’s variables: continuous gestational age, birth  
38 weight, Bayley-III cognitive composite score, and corrected age at assessment. The  
39 interaction between preterm birth and maternal depressive symptoms was explored using a  
40 complete case analysis in both CBCL and Q-CHAT models, using a dichotomised measure of  
41 gestational age. EPDS, CBCL and Q-CHAT scores were compared between term ( $\geq 37$  weeks  
42 gestation) and preterm infants ( $< 37$  weeks gestation) using the complete case dataset.  
43  
44  
45  
46  
47  
48  
49  
50

51 In order to investigate the specificity of the association between maternal EPDS scores and  
52 child’s behavioural outcomes (versus cognitive outcomes) we repeated the analyses to predict  
53 Bayley-III Cognitive Composite score, with the following variables: IMD rank, maternal age,  
54 maternal BMI, maternal parity, pregnancy size, and the following child’s variables:  
55 gestational age, birth weight, corrected age at assessment, and Q-CHAT score. CBCL score  
56  
57  
58  
59  
60

1  
2  
3 was not included in the model predicting cognitive outcome, because cognition was not a  
4 significant predictor of CBCL (see Results).  
5  
6  
7

8 As all mothers had their EPDS score measured near term (or term-corrected in the case of  
9 mothers of preterm infants), we further investigated the association between time elapsing  
10 between baby's birth and mother's EPDS assessment and EPDS score, in order to avoid  
11 erroneously identifying 'baby blues' in mothers of term-born infants versus postnatal  
12 depression in mothers of preterm infants. This post-hoc analysis was performed using  
13 Poisson regression.  
14  
15  
16  
17  
18  
19

### 20 Patient and Public Involvement

21 The current study was developed in consultation with the Weston Programme for Family  
22 Centered Research, which involves parents to define what research is valuable to them, and to  
23 allow them to lead it with support from the scientists in the Centre for the Developing Brain.  
24  
25  
26  
27  
28

### 29 Results

#### 30 Descriptive statistics

31 Our sample of 509 toddlers were followed up at a median corrected age of 18.4 months  
32 (range 17.3 – 24.3 months). 51 (10.0%) of these were twins, and 3 (0.59%) were triplets. Of  
33 the 509, 21 (4.13%) mothers scored above a clinical cut-off ( $\geq 13$ ) on the EPDS;(26) the  
34 distribution of maternal EPDS scores is shown graphically in Supplementary Figure 1.  
35 Demographic data are shown in Table 1. Complete data were available for 400 (78.6%)  
36 participants. Missing data were imputed and thus all 509 subjects were included in the  
37 primary and secondary analyses. One participant was excluded from the cognition analysis  
38 after examining the quintiles of the residuals against the theoretical quintiles of a normal  
39 distribution. The mean CBCL T score was 46.9 (SD 9.5) (Table 1); using CBCL-specified  
40 cut-offs,<sup>35</sup> 449 (90.2%) of participants had a CBCL score in the normal range, 30 (6.0%)  
41 were borderline, and 19 (3.8%) scored in the clinical range. The mean Q-CHAT score was  
42 30.5 (SD 9.3) (Table 1). The mean Bayley III Cognitive Composite score in our sample was  
43 100 (SD 11.4) (Table 1), which corresponds to the standardised test mean;<sup>38</sup> 480 (94.3%) of  
44 participants had a normal cognitive score, 24 (4.7%) had mild impairment, 5 (1%) had  
45 moderate impairment, and nil had severe impairment. This distribution is not dissimilar from  
46 that of the normative sample.<sup>38</sup>  
47  
48  
49  
50  
51  
52  
53  
54  
55  
56  
57  
58  
59  
60

### Association between maternal EPDS score and toddler CBCL and Q-CHAT scores

Predictors of children's CBCL and Q-CHAT scores after multiple imputation are shown in Table 2. Higher maternal EPDS score was associated with children's higher CBCL Total score ( $B=0.93$ , 95% CI 0.43-1.44,  $p<0.001$ ,  $f^2=0.05$ ) and Q-CHAT score ( $B=0.27$ , 95% CI 0.03-0.52,  $p=.031$ ,  $f^2=0.01$ ) (Table 2). These associations are presented graphically in Figure 1 and Figure 2, respectively. Boys had higher CBCL and Q-CHAT scores than girls. Higher Q-CHAT scores were associated with lower IMD rank (i.e., greater socio-economic deprivation) and lower Bayley-III cognitive composite scores. Parity was not a significant predictor of outcome in any of the models (Table 2).

### Association between maternal EPDS score and toddler CBCL internalising and externalising scores

Higher maternal EPDS score was associated with both internalising ( $B=0.22$ , 95% CI 0.08-0.36,  $p<0.01$ ,  $f^2=0.03$ ) and externalising ( $B=0.40$ , 95% CI 0.20-0.61,  $p<0.001$ ,  $f^2=0.05$ ) symptoms in children (Supplementary Table 1 and 2, respectively). Comparison of the imputed model analyses to the complete-case analyses showed that results were consistent for the CBCL model (Supplementary Table 3). Comparison for the Q-CHAT model showed that maternal EPDS was a significant predictor in the imputed model, but not in the complete-case analysis (Supplementary Table 3).

### Interaction effect of preterm birth and maternal EPDS score on toddler CBCL and Q-CHAT scores

Maternal EPDS scores did not differ between preterm and term groups in the complete dataset ( $t(434)=0.11$ ,  $p=0.92$ ). CBCL scores ( $t(496)=0.95$ ,  $p=0.34$ ) and Q-CHAT scores ( $t(122.6)=0.50$ ,  $p=0.62$ ) did not differ between preterm and term groups in the complete dataset. Maternal EPDS score did not disproportionately affect preterm children with respect to CBCL or Q-CHAT scores (Table 3).

### Association between maternal EPDS score and toddler cognitive outcomes

Predictors of children's cognitive score are shown in Table 4. Maternal EPDS score at term was not associated with toddlers' cognitive outcomes ( $B=-0.22$ , 95% CI -0.50-0.05,  $p=.108$ ).

### Effect of time-lag between baby's birth and mother's EPDS assessment and EPDS score

Mothers who gave birth prematurely (<37 weeks gestation) had their EPDS score assessed on average 7.7 weeks later post-delivery than mothers who gave birth at term (preterm

1  
2  
3 participants  $M=8.9$  (SD 4.8), term participants  $M=1.2$  (SD 1.3);  $t(99.4)=15.5$ ,  $p<.001$ ). The  
4 time-lag between birth and EPDS assessment did not predict maternal EPDS score, and there  
5 was no evidence of a significant interaction between gestation and birth-to-assessment time-  
6 lag (Supplementary Table 4 and 5, respectively).  
7  
8  
9

## 10 11 **Discussion**

### 12 **Principal findings**

13  
14 Our results showed that more maternal self-reported depressive symptoms shortly after birth  
15 were associated with greater parent-reported toddlers' behavioural problems – both  
16 internalising and externalising symptoms – and ASD traits, but not with cognitive outcomes.  
17 Given that fewer than 5% of the mothers in our cohort had EPDS scores above a clinical  
18 threshold,<sup>33</sup> our findings indicate that even subclinical depressive symptoms – i.e. not only  
19 diagnostic postnatal depression – adversely impact children's behavioural outcomes. In  
20 addition, our cohort was typically developing with few CBCL scores reaching a concerning  
21 threshold; our results could be interpreted within the conceptual framework of mental illness  
22 lying on a continuum with typical behavioural traits.<sup>46</sup> Our findings further showed that  
23 preterm birth did not influence the association between self-reported maternal depressive  
24 symptoms and parent-reported infants' behavioural outcomes in toddlerhood. This indicates  
25 that in this context preterm birth may not be regarded as a vulnerability or plasticity factor.  
26 Interestingly, mothers of preterm infants did not report more depressive symptoms compared  
27 to mothers of term infants in this study.  
28  
29  
30  
31  
32  
33  
34  
35  
36  
37  
38  
39  
40

### 41 **Comparison to prior literature**

42 Our results with respect to internalising and externalising symptoms are in line with previous  
43 studies, including large population cohort studies, that showed an association between  
44 postnatal maternal depression and young children's emotional and behavioural problems.<sup>11</sup>  
45 Another previous study in 18-month old toddlers found that maternal depression was  
46 associated with internalising and dysregulated behaviour, but not externalising symptoms.<sup>47</sup>  
47 This difference between our and Conroy et al.'s findings may have arisen from their  
48 exclusion of infants born <36 weeks and their use of a clinical diagnosis of depression for  
49 mothers, rather than the continuous self-reported approach we employed. Interestingly, our  
50 finding that even subclinical depressive symptoms may adversely impact parent-reported  
51 child behavioural outcomes is in line with recent data showing that low- as well as high-level  
52  
53  
54  
55  
56  
57  
58  
59  
60

1  
2  
3 depressive symptoms are associated with internalising and externalising symptoms in  
4 children aged 3 years.<sup>48</sup>  
5  
6  
7

8 The results showing an association between maternal postnatal depressive symptoms and  
9 parental report of childhood ASD traits are less robust and need to be interpreted with  
10 caution. Although some prior studies have shown an association between antenatal maternal  
11 depression and offspring's ASD,<sup>10,49</sup> and postnatal depression has been suggested as a  
12 potential focus of cross-domain studies of ASD,<sup>50</sup> there is no clear aetiological role of  
13 maternal postnatal depression in the development of ASD *per se*. Also, given that mothers  
14 with ASD are more likely to suffer from perinatal depression than mothers without ASD,<sup>51</sup>  
15 and ASD is highly heritable,<sup>52</sup> maternal depression may actually be a confounding rather than  
16 causative factor in our observed results.  
17  
18  
19  
20  
21  
22  
23  
24  
25

26 The finding that preterm infants were not disproportionately affected by maternal depressive  
27 symptoms supports Hadfield et al.'s findings that maternal distress at 9 months did not  
28 differentially impact very preterm (<34 weeks) or late preterm (34-36<sup>+6</sup> weeks) infants with  
29 respect to socioemotional outcomes, although paternal distress did have an impact on very  
30 preterm infants' outcomes.<sup>24</sup> However, our results differ from Gueron-Sela et al.'s finding  
31 that very preterm (28-33 weeks) 12 month old infants' social outcomes were more influenced  
32 by maternal emotional distress at 6 months than term infants' outcomes.<sup>22</sup> The inconsistent  
33 findings may be due to methodological differences: for instance, our infant assessment being  
34 conducted at 18 months corrected age when social competency is more developed, our  
35 assessment of maternal depressive symptoms being in the very early postnatal period, or our  
36 use of a screening measure, the Q-CHAT, as a measure of ASD traits. Importantly, the lack  
37 of support for a diathesis-stress or differential susceptibility model of maternal mental state  
38 on preterm infants in our study must be viewed in the context of our results also showing no  
39 difference in CBCL and Q-CHAT scores between term and preterm infants. This is in  
40 contrast to the existing literature that preterm infants are more likely than term infants to  
41 develop behavioural problems, such as ADHD, in childhood and adolescence.<sup>19,30</sup> It is  
42 possible that the phenotypes of neurodevelopmental and neuropsychiatric disorders assessed  
43 with the chosen behavioural measures may not be sufficiently expressed at 18 months  
44 corrected age.<sup>53</sup> In addition, as briefly discussed above, much of the existing literature  
45 emphasises the risk of extreme (<28 weeks) or very preterm (28-33 weeks) birth on later  
46  
47  
48  
49  
50  
51  
52  
53  
54  
55  
56  
57  
58  
59  
60



1  
2  
3 behavioural outcomes,<sup>19,30</sup> whereas only 3.5% and 5.5% of our participants fell within the  
4 extreme and very preterm group, respectively, and we thus may not have the power to show  
5 any subtle effects.  
6  
7  
8  
9

### 10 **Strengths & limitations of the study**

11 The strengths of this study lie primarily in its large sample and prospective data collection.  
12 Moreover, the use of multiple imputation methodology has facilitated retention of a complete  
13 dataset, thus minimising non-response bias and increasing parameter precision. A strength in  
14 comparison to prior population cohort studies is that we assessed very early maternal  
15 depressive symptoms, and our sample is perhaps more representative of today's society –  
16 with increasing maternal age – than large cohort studies conducted in the 1990s-2000s. Given  
17 the complex interplay of biological and environmental factors in the aetiology of behavioural  
18 disorders, the inclusion of a substantive proportion of preterm infants in our cohort also offers  
19 an important insight into the role of preterm birth in behavioural outcomes; moreover, our  
20 results represent the full gestational spectrum, rather than discrete gestational categories. In  
21 addition, using maternal depressive symptoms as a continuous, rather than dichotomous,  
22 variable allows a more nuanced understanding of the role maternal postnatal depressive  
23 symptoms may play in influencing children's outcomes.  
24  
25  
26  
27  
28  
29  
30  
31  
32  
33  
34  
35

36 There are several limitations to this study that necessitate our findings to be considered with  
37 caution. Firstly, differences in birth-to-EPDS-assessment time-lags are a potential  
38 confounder, given the time-sensitive nature of early-onset temporary baby blues and later-  
39 onset pathological postnatal depression. Mothers of infants born at term were assessed early  
40 post-delivery, within the period one would anticipate baby blues to present, whereas mothers  
41 of preterm participants were on average assessed later, when postnatal depression  
42 predominates.<sup>1,54</sup> Although our post-hoc analyses showed that the time elapsed from birth to  
43 EPDS assessment was not associated with maternal EPDS score, providing reassurance that  
44 our assessments of mothers of term-born infants were not inflated by the common temporary  
45 symptoms of baby blues, it is possible that we did not capture the full extent of later-onset  
46 depressive symptoms in mothers of term-born infants. This may explain why maternal EPDS  
47 scores did not differ between preterm and term groups in our complete dataset analysis,  
48 contrary to the current literature,<sup>28</sup> as well as why our rate of postpartum depression, using an  
49 EPDS cut-off of 13, was low (4.1%) compared to the previously documented UK community  
50  
51  
52  
53  
54  
55  
56  
57  
58  
59  
60

1  
2  
3 prevalence rate of 8.9% at eight weeks postpartum.<sup>55</sup> Our results must therefore be  
4 interpreted with some caution.  
5  
6  
7

8  
9 Secondly, although statistical techniques were used to impute missing data and mitigate this  
10 problem, 14.3% of maternal EPDS scores were missing. This rate of missingness may relate  
11 to some mothers being reluctant to complete a questionnaire at the time their child is having  
12 an MRI, or due to simultaneous childcare duties. Thirdly, a number of important confounders  
13 that are likely to affect children's behavioural outcomes were not assessed in this study,  
14 including genetic risk for psychiatric disorders,<sup>56</sup> parental psychiatric co-morbidities,<sup>47</sup>  
15 chronicity of postnatal depressive symptoms,<sup>48</sup> antenatal maternal depression, paternal  
16 depression and subsequent parent-infant attachment, and inter-parental conflict.<sup>11</sup> Thus, we  
17 are unable to conclude whether our observed associations between early postnatal maternal  
18 depressive symptoms and children's behavioural outcomes are moderated or mediated by  
19 other parental and/or psychiatric factors.  
20  
21  
22  
23  
24  
25  
26  
27  
28

29 Fourthly, whilst our study included a reasonable proportion of preterm infants (97/509, 19%),  
30 our sample was not random, as preterm children were selectively recruited for the DHCP;  
31 indeed, preterm infants are over-represented in our sample when compared to the UK  
32 population incidence (7.3%),<sup>57</sup> which may limit the study's generalisability to the general  
33 population. This over-representation of preterm infants may explain why our mean maternal  
34 age is higher than the national mean age of 30.7,<sup>58</sup> given that increasing maternal age is  
35 associated with increased risk of adverse pregnancy outcomes.<sup>59</sup> Furthermore, although a  
36 19% prevalence of preterm birth is high for a community sample, the proportion of very and  
37 extreme preterm infants in our sample is small, and this may not have provided sufficient  
38 power to detect any differential susceptibility effect of preterm birth on outcomes.  
39  
40  
41  
42  
43  
44  
45  
46  
47

48 Sixthly, the effect sizes of the association between maternal EPDS score and behavioural  
49 problems and ASD traits, respectively, were small; this raises questions regarding the clinical  
50 significance of our findings and potentially explains some of the inconsistency between this  
51 and previous studies. Even within our analyses, the association between maternal depressive  
52 symptoms and ASD traits was not observed in our complete case analysis, thus calling into  
53 question the validity of this result. It is also important to highlight the continuum of ASD  
54 traits that are conceptualised by the Q-CHAT,<sup>36</sup> as well as its poor positive predictive value;<sup>37</sup>  
55  
56  
57  
58  
59  
60

1  
2  
3 the presence of traits does not imply a diagnosis of ASD, and this distinction may also  
4 explain the contrast to previous studies.  
5  
6  
7

8 Finally, it is well documented that maternal depression influences reporting of ASD traits,<sup>60</sup>  
9 Q-CHAT,<sup>61</sup> and CBCL scores.<sup>62</sup> Our study used maternal report of maternal depressive  
10 symptoms, and our outcome measures were parent-completed questionnaires; despite the  
11 CBCL showing good cross-informant agreement,<sup>35</sup> it is thus possible that reporting bias with  
12 common method variance could have skewed our results.  
13  
14  
15  
16  
17

### 18 **Implications of our findings**

19 Of greatest importance to clinicians and policymakers is our finding that even *subclinical*  
20 self-reported maternal depressive symptoms are associated with parent-reported behavioural  
21 outcomes of offspring. This has significant implications for the risk-stratification of women  
22 and their babies in the postnatal period, during which contact with medical professionals is  
23 already established. Identifying high risk families and providing appropriate supportive  
24 measures at the early postnatal stage may help to prevent future psychiatric morbidity.  
25  
26  
27  
28  
29  
30  
31

### 32 **Future research**

33 Further follow-up of large cohorts of preterm and term infants, to an age when behavioural  
34 phenotypes may become more pronounced, is needed to investigate whether the long-term  
35 developmental trajectories of term and ex-preterm infants are differentially susceptible to  
36 changes of postnatal maternal mental health. Future research should consider both maternal  
37 and paternal mental health, as well as socioeconomic and environmental factors on child  
38 outcomes. Such follow-up should use independent, objective assessments of child  
39 behavioural outcomes in order to avoid the common method variance inherent to parent-  
40 reported measures. In addition, further study is also needed to elucidate the role of maternal  
41 depression in the aetiology of ASD, controlling for both diagnostic and sub-clinical maternal  
42 ASD symptomatology. Finally, it is crucial for future research to elucidate the interplay of  
43 biochemical and neurodevelopmental changes that may mediate and confound the translation  
44 of environmental exposures into distal behavioural phenotypes.  
45  
46  
47  
48  
49  
50  
51  
52  
53  
54  
55

### 56 **Conclusion**

57 This prospective longitudinal cohort study found no evidence to support the concept of  
58 preterm birth as a vulnerability or plasticity factor with respect to the effect of maternal  
59  
60

1  
2  
3 depressive symptoms on behavioural development. However, we showed that early  
4 subclinical maternal postnatal depressive symptoms were associated with behavioural  
5 problems in children on parent-reported measures. This adds to the increasing body of  
6 literature indicating the role of subclinical and early postnatal depressive symptoms in the  
7 aetiology of childhood behavioural disorders. These findings are of great relevance to child  
8 and public health, and further research may strengthen its implications for developing  
9 strategies to facilitate effective screening and support for women and children, enabling all to  
10 reach their full potential.  
11  
12  
13  
14  
15  
16  
17  
18  
19  
20

### 21 **Acknowledgements & contributions**

22 We thank all DHCP investigators for their contribution to the study. We thank Dr Oliver  
23 Gale-Grant MRes (Centre for the Developing Brain, King's College London; Department of  
24 Forensic & Neurodevelopmental Sciences, King's College London) for providing the IMD  
25 rank data. We are very grateful to the families who generously took part in this research.  
26  
27  
28  
29

30  
31 **Conceptualization:** SC, ADE, CN; **Methodology:** IK, GV, SC, AP, ADE, CN;

32 **Investigation:** SF, AC; **Data curation:** IK, AL; **Formal analysis:** IK, GV, AP, CN;

33 **Writing – original draft preparation:** IK; **Writing – Review & Editing:** GV, AL, SF, AC,  
34 SC, AP, ADE, CN; **Visualisation:** IK, GV; **Funding acquisition:** SC, ADE; **Supervision:**  
35 AP, ADE, CN.  
36  
37  
38  
39  
40  
41

### 42 **References**

- 43 1. Woody CA, Ferrari AJ, Siskind DJ, Whiteford HA, Harris MG. A systematic review  
44 and meta-regression of the prevalence and incidence of perinatal depression. *J Affect*  
45 *Disord.* 2017;219:86-92. doi:10.1016/j.jad.2017.05.003  
46  
47
- 48 2. Rezaie-Keikhaie K, Arbabshastan ME, Rafiemanesh H, Amirshahi M, Ostadkelayeh  
49 SM, Arbabisarjou A. Systematic Review and Meta-Analysis of the Prevalence of the  
50 Maternity Blues in the Postpartum Period. *J Obstet Gynecol Neonatal Nurs.*  
51 2020;49(2):127-136. doi:10.1016/j.jogn.2020.01.001  
52  
53
- 54 3. Beck CT. Predictors of postpartum depression: an update. *Nurs Res.* 2001;50(5):275-  
55 285.  
56
- 57 4. de Paula Eduardo JAF, de Rezende MG, Menezes PR, Del-Ben CM. Preterm birth as a  
58 risk factor for postpartum depression: A systematic review and meta-analysis. *J Affect*  
59 *Disord.* 2019;259:392-403. doi:10.1016/j.jad.2019.08.069  
60

- 1
  - 2
  - 3
  - 4
  - 5
  - 6
  - 7
  - 8
  - 9
  - 10
  - 11
  - 12
  - 13
  - 14
  - 15
  - 16
  - 17
  - 18
  - 19
  - 20
  - 21
  - 22
  - 23
  - 24
  - 25
  - 26
  - 27
  - 28
  - 29
  - 30
  - 31
  - 32
  - 33
  - 34
  - 35
  - 36
  - 37
  - 38
  - 39
  - 40
  - 41
  - 42
  - 43
  - 44
  - 45
  - 46
  - 47
  - 48
  - 49
  - 50
  - 51
  - 52
  - 53
  - 54
  - 55
  - 56
  - 57
  - 58
  - 59
  - 60
5. Blom EA, Jansen PW, Verhulst FC, et al. Perinatal complications increase the risk of postpartum depression. The Generation R Study. *BJOG Int J Obstet Gynaecol*. 2010;117(11):1390-1398. doi:10.1111/j.1471-0528.2010.02660.x
6. Beck CT. Postpartum depression: a metasynthesis. *Qual Health Res*. 2002;12(4):453-472. doi:10.1177/104973202129120016
7. Grace SL, Evindar A, Stewart DE. The effect of postpartum depression on child cognitive development and behavior: a review and critical analysis of the literature. *Arch Womens Ment Health*. 2003;6(4):263-274. doi:10.1007/s00737-003-0024-6
8. Lebel C, Walton M, Letourneau N, Giesbrecht GF, Kaplan BJ, Dewey D. Prepartum and postpartum maternal depressive symptoms are related to children's brain structure in preschool. *Biol Psychiatry*. 2016;80(11):859-868. doi:10.1016/j.biopsych.2015.12.004
9. Goodman SH, Rouse MH, Connell AM, Broth MR, Hall CM, Heyward D. Maternal depression and child psychopathology: a meta-analytic review. *Clin Child Fam Psychol Rev*. 2011;14(1):1-27. doi:10.1007/s10567-010-0080-1
10. Hagberg KW, Robijn AL, Jick S. Maternal depression and antidepressant use during pregnancy and the risk of autism spectrum disorder in offspring. *Clin Epidemiol*. 2018;10:1599-1612. doi:10.2147/CLEP.S180618
11. Stein A, Pearson RM, Goodman SH, et al. Effects of perinatal mental disorders on the fetus and child. *The Lancet*. 2014;384(9956):1800-1819. doi:10.1016/S0140-6736(14)61277-0
12. Van Batenburg-Eddes T, Brion MJ, Henrichs J, et al. Parental depressive and anxiety symptoms during pregnancy and attention problems in children: a cross-cohort consistency study. *J Child Psychol Psychiatry*. 2013;54(5):591-600. doi:10.1111/jcpp.12023
13. Barker ED, Jaffee SR, Uher R, Maughan B. The contribution of prenatal and postnatal maternal anxiety and depression to child maladjustment. *Depress Anxiety*. 2011;28(8):696-702. doi:10.1002/da.20856
14. Pearson RM, Evans J, Kounali D, et al. Maternal depression during pregnancy and the postnatal period: risks and possible mechanisms for offspring depression at 18 years. *JAMA Psychiatry*. 2013;70(12):1312-1319. doi:10.1001/jamapsychiatry.2013.2163
15. Kleine I, Falconer S, Roth S, et al. Early postnatal maternal trait anxiety is associated with the behavioural outcomes of children born preterm <33 weeks. *J Psychiatr Res*. 2020;131:160-168. doi:10.1016/j.jpsychires.2020.09.010
16. Feder A, Nestler EJ, Charney DS. Psychobiology and molecular genetics of resilience. *Nat Rev Neurosci*. 2009;10(6):446-457. doi:10.1038/nrn2649
17. Dimitrova R, Pietsch M, Christiaens D, et al. Heterogeneity in brain microstructural development following preterm birth. *Cereb Cortex*. 2020;30(9):4800-4810. doi:10.1093/cercor/bhaa069

18. Fitzallen GC, Sagar YK, Taylor HG, Bora S. Anxiety and depressive disorders in children born preterm: a meta-analysis. *J Dev Behav Pediatr JDBP*. 2021;42(2):154-162. doi:10.1097/DBP.0000000000000898
19. Allotey J, Zamora J, Cheong-See F, et al. Cognitive, motor, behavioural and academic performances of children born preterm: a meta-analysis and systematic review involving 64 061 children. *BJOG Int J Obstet Gynaecol*. 2018;125(1):16-25. doi:10.1111/1471-0528.14832
20. Jaekel J, Pluess M, Belsky J, Wolke D. Effects of maternal sensitivity on low birth weight children's academic achievement: a test of differential susceptibility versus diathesis stress. *J Child Psychol Psychiatry*. 2015;56(6):693-701. doi:10.1111/jcpp.12331
21. Belsky J, Bakermans-Kranenburg MJ, van IJzendoorn MH. For better and for worse: differential susceptibility to environmental influences. *Curr Dir Psychol Sci*. 2007;16(6):300-304. doi:10.1111/j.1467-8721.2007.00525.x
22. Gueron-Sela N, Atzaba-Poria N, Meiri G, Marks K. The caregiving environment and developmental outcomes of preterm infants: diathesis stress or differential susceptibility effects? *Child Dev*. 2015;86(4):1014-1030. doi:https://doi.org/10.1111/cdev.12359
23. Hadfield K, O'Brien F, Gerow A. Is level of prematurity a risk/plasticity factor at three years of age? *Infant Behav Dev*. 2017;47:27-39. doi:10.1016/j.infbeh.2017.03.003
24. Belsky J, Pluess M. Beyond diathesis stress: differential susceptibility to environmental influences. *Psychol Bull*. 2009;135(6):885-908. doi:10.1037/a0017376
25. Pluess M, Belsky J. Prenatal programming of postnatal plasticity? *Dev Psychopathol*. 2011;23(1):29-38. doi:10.1017/S0954579410000623
26. DeMaster D, Bick J, Johnson U, Montroy JJ, Landry S, Duncan AF. Nurturing the preterm infant brain: leveraging neuroplasticity to improve neurobehavioral outcomes. *Pediatr Res*. 2019;85(2):166-175. doi:10.1038/s41390-018-0203-9
27. World Health Organization (WHO). Global nutrition targets 2025: low birth weight policy brief. Published online 2014.
28. Carson C, Redshaw M, Gray R, Quigley MA. Risk of psychological distress in parents of preterm children in the first year: evidence from the UK Millennium Cohort Study. *BMJ Open*. 2015;5(12):e007942. doi:10.1136/bmjopen-2015-007942
29. Vigod SN, Villegas L, Dennis CL, Ross LE. Prevalence and risk factors for postpartum depression among women with preterm and low-birth-weight infants: a systematic review. *BJOG Int J Obstet Gynaecol*. 2010;117(5):540-550. doi:10.1111/j.1471-0528.2009.02493.x
30. Johnson S, Wolke D. Behavioural outcomes and psychopathology during adolescence. *Early Hum Dev*. 2013;89(4):199-207. doi:10.1016/j.earlhumdev.2013.01.014
31. Lautarescu A, Victor S, Lau-Zhu A, Counsell SJ, Edwards AD, Craig MC. The factor structure of the Edinburgh Postnatal Depression Scale among perinatal high-risk and

- 1  
2  
3 community samples in London. *Arch Womens Ment Health*. 2022;25(1):157-169.  
4 doi:10.1007/s00737-021-01153-0  
5
- 6  
7 32. Ministry of Housing, Communities & Local Government. The English indices of  
8 deprivation 2019. Published online 2019.  
9 [https://assets.publishing.service.gov.uk/government/uploads/system/uploads/attachment](https://assets.publishing.service.gov.uk/government/uploads/system/uploads/attachment_data/file/835115/IOD2019_Statistical_Release.pdf)  
10 [\\_data/file/835115/IOD2019\\_Statistical\\_Release.pdf](https://assets.publishing.service.gov.uk/government/uploads/system/uploads/attachment_data/file/835115/IOD2019_Statistical_Release.pdf)  
11
- 12 33. Cox JL, Holden JM, Sagovsky R. Detection of postnatal depression: development of the  
13 10-item Edinburgh Postnatal Depression Scale. *Br J Psychiatry*. 1987;150(6):782-786.  
14 doi:10.1192/bjp.150.6.782  
15
- 16 34. Levis B, Negeri Z, Sun Y, Benedetti A, Thombs BD. Accuracy of the Edinburgh  
17 Postnatal Depression Scale (EPDS) for screening to detect major depression among  
18 pregnant and postpartum women: systematic review and meta-analysis of individual  
19 participant data. *BMJ*. 2020;371. doi:10.1136/bmj.m4022  
20  
21
- 22 35. Achenbach TM, Rescorla LA. *Manual for the ASEBA preschool forms & profiles.*;  
23 2000.  
24
- 25 36. Allison C, Baron-Cohen S, Wheelwright S, et al. The Q-CHAT (Quantitative Checklist  
26 for Autism in Toddlers): a normally distributed quantitative measure of autistic traits at  
27 18-24 months of age: preliminary report. *J Autism Dev Disord*. 2008;38(8):1414-1425.  
28 doi:10.1007/s10803-007-0509-7  
29  
30
- 31 37. Allison C, Matthews FE, Ruta L, et al. Quantitative Checklist for Autism in Toddlers  
32 (Q-CHAT). A population screening study with follow-up: the case for multiple time-  
33 point screening for autism. *BMJ Paediatr Open*. 2021;5(1):e000700.  
34 doi:10.1136/bmjpo-2020-000700  
35
- 36 38. Bayley N. *Bayley scales of infant and toddler development - third edition*. 3rd ed.  
37 Harcourt Assessment; 2006.  
38  
39
- 40 39. Albers CA, Grieve AJ. Review of Bayley scales of infant and toddler development-third  
41 edition. *J Psychoeduc Assess*. 2007;25(2):180-190. doi:10.1177/0734282906297199  
42
- 43 40. Anderson PJ, De Luca CR, Hutchinson E, Roberts G, Doyle LW, the Victorian Infant  
44 Collaborative Group. Underestimation of developmental delay by the new Bayley-III  
45 scale. *Arch Pediatr Adolesc Med*. 2010;164(4):352-356.  
46 doi:10.1001/archpediatrics.2010.20  
47
- 48 41. White IR, Royston P, Wood AM. Multiple imputation using chained equations: Issues  
49 and guidance for practice. *Stat Med*. 2011;30(4):377-399.  
50 doi:<https://doi.org/10.1002/sim.4067>  
51
- 52 42. Rubin DB. Inference and missing data. *Biometrika*. 1976;63(3):581-592.  
53 doi:10.2307/2335739  
54
- 55 43. Cohen J. *Statistical power analysis for the behavioral sciences*. 2nd ed. L. Erlbaum  
56 Associates; 1988.  
57  
58  
59  
60

- 1
  - 2
  - 3
  - 4
  - 5
  - 6
  - 7
  - 8
  - 9
  - 10
  - 11
  - 12
  - 13
  - 14
  - 15
  - 16
  - 17
  - 18
  - 19
  - 20
  - 21
  - 22
  - 23
  - 24
  - 25
  - 26
  - 27
  - 28
  - 29
  - 30
  - 31
  - 32
  - 33
  - 34
  - 35
  - 36
  - 37
  - 38
  - 39
  - 40
  - 41
  - 42
  - 43
  - 44
  - 45
  - 46
  - 47
  - 48
  - 49
  - 50
  - 51
  - 52
  - 53
  - 54
  - 55
  - 56
  - 57
  - 58
  - 59
  - 60
44. Selya AS, Rose JS, Dierker LC, Hedeker D, Mermelstein RJ. A practical guide to calculating Cohen's  $f^2$ , a measure of local effect size, from PROC MIXED. *Front Psychol*. 2012;3. doi:10.3389/fpsyg.2012.00111
45. Harel O. The estimation of  $R^2$  and adjusted  $R^2$  in incomplete data sets using multiple imputation. *J Appl Stat*. 2009;36(10):1109-1118. doi:10.1080/02664760802553000
46. Plomin R, Haworth CMA, Davis OSP. Common disorders are quantitative traits. *Nat Rev Genet*. 2009;10(12):872-878. doi:10.1038/nrg2670
47. Conroy S, Pariante CM, Marks MN, et al. Maternal psychopathology and infant development at 18 months: the impact of maternal personality disorder and depression. *J Am Acad Child Adolesc Psychiatry*. 2012;51(1):51-61. doi:10.1016/j.jaac.2011.10.007
48. Kingston D, Kehler H, Austin MP, et al. Trajectories of maternal depressive symptoms during pregnancy and the first 12 months postpartum and child externalizing and internalizing behavior at three years. *PLoS One*. 2018;13(4):e0195365. doi:10.1371/journal.pone.0195365
49. Wiggins LD, Rubenstein E, Daniels J, et al. A phenotype of childhood autism is associated with preexisting maternal anxiety and depression. *J Abnorm Child Psychol*. 2019;47(4):731-740. doi:10.1007/s10802-018-0469-8
50. Babb JA, Deligiannidis KM, Murgatroyd CA, Nephew BC. Peripartum depression and anxiety as an integrative cross-domain target for psychiatric preventative measures. *Behav Brain Res*. 2015;0:32-44. doi:10.1016/j.bbr.2014.03.039
51. Pohl AL, Crockford SK, Blakemore M, Allison C, Baron-Cohen S. A comparative study of autistic and non-autistic women's experience of motherhood. *Mol Autism*. 2020;11(1):3. doi:10.1186/s13229-019-0304-2
52. Colvert E, Tick B, McEwen F, et al. Heritability of autism spectrum disorder in a UK population-based twin sample. *JAMA Psychiatry*. 2015;72(5):415-423. doi:10.1001/jamapsychiatry.2014.3028
53. Egger HL, Emde RN. Developmentally sensitive diagnostic criteria for mental health disorders in early childhood: the diagnostic and statistical manual of mental disorders-IV, the research diagnostic criteria-preschool age, and the diagnostic classification of mental health and developmental disorders of infancy and early childhood-revised. *Am Psychol*. 2011;66(2):95-106. doi:10.1037/a0021026
54. Henshaw C. Mood disturbance in the early puerperium: a review. *Arch Women's Ment Health*. 2003;6(2):s33-s42. doi:10.1007/s00737-003-0004-x
55. Heron J, O'Connor TG, Evans J, Golding J, Glover V. The course of anxiety and depression through pregnancy and the postpartum in a community sample. *J Affect Disord*. 2004;80(1):65-73. doi:10.1016/j.jad.2003.08.004
56. Biel MG. Parental psychiatric symptoms and children's outcomes: toward understanding and responding to intergenerational risk in child psychiatry. *J Am Acad Child Adolesc Psychiatry*. 2018;57(9):632-633. doi:10.1016/j.jaac.2018.06.010



- 1  
2  
3  
4  
5  
6  
7  
8  
9  
10  
11  
12  
13  
14  
15  
16  
17  
18  
19  
20  
21  
22  
23  
24  
25  
26  
27  
28  
29  
30  
31  
32  
33  
34  
35  
36  
37  
38  
39  
40  
41  
42  
43  
44  
45  
46  
47  
48  
49  
50  
51  
52  
53  
54  
55  
56  
57  
58  
59  
60
57. National Institute for Health and Care Excellence. Preterm labour and birth (NICE guideline 25). Published online November 2015. Accessed January 27, 2019. <https://www.nice.org.uk/guidance/ng25>
  58. Office for National Statistics. Birth characteristics in England and Wales: 2020. Published January 13, 2022. Accessed February 5, 2022. <https://www.ons.gov.uk/peoplepopulationandcommunity/birthsdeathsandmarriages/livebirths/bulletins/birthcharacteristicsinenglandandwales/2020#birth-characteristics>
  59. Londero AP, Rossetti E, Pittini C, Cagnacci A, Driul L. Maternal age and the risk of adverse pregnancy outcomes: a retrospective cohort study. *BMC Pregnancy Childbirth*. 2019;19(1):261. doi:10.1186/s12884-019-2400-x
  60. Bennett T, Boyle M, Georgiades K, et al. Influence of reporting effects on the association between maternal depression and child autism spectrum disorder behaviors. *J Child Psychol Psychiatry*. 2012;53(1):89-96. doi:10.1111/j.1469-7610.2011.02451.x
  61. Goh DA, Gan D, Kung J, et al. Child, maternal and demographic factors influencing caregiver-reported autistic trait symptomatology in toddlers. *J Autism Dev Disord*. 2018;48(4):1325-1337. doi:10.1007/s10803-018-3471-7
  62. Friedlander S, Weiss DS, Traylor J. Assessing the influence of maternal depression on the validity of the Child Behavior Checklist. *J Abnorm Child Psychol*. 1986;14(1):123-133. doi:10.1007/bf00917228

**Table 1: Socio-demographic, maternal and clinical characteristics (n=509)**

| Variable                                                  | Number (%) <sup>*</sup>  |
|-----------------------------------------------------------|--------------------------|
| Sex: Male                                                 | 274 (53.8)               |
| Index of Multiple Deprivation (IMD) quintiles             |                          |
| 1 (least deprived) <sup>a</sup>                           | 65 (12.8)                |
| 2                                                         | 87 (17.2)                |
| 3                                                         | 108 (21.3)               |
| 4                                                         | 173 (34.2)               |
| 5 (most deprived)                                         | 73 (14.4)                |
| Gestational age at birth (weeks), median [range]          | 39.7 [20 – 43]           |
| Gestational category                                      |                          |
| Extremely preterm (<28 weeks)                             | 18 (3.5)                 |
| Very preterm (28-32 weeks)                                | 28 (5.5)                 |
| Late preterm (32-37 weeks)                                | 51 (10.0)                |
| Term (≥37 weeks)                                          | 412 (80.9)               |
| Birthweight (g), median [range]                           | 3290 [450 – 4750]        |
| Multiple pregnancy                                        | 54 (10.6)                |
| Maternal parity                                           |                          |
| 0                                                         | 332 (65.2)               |
| 1                                                         | 124 (24.4)               |
| 2                                                         | 32 (6.3)                 |
| 3+                                                        | 21 (4.2)                 |
| Maternal BMI (kg/m <sup>2</sup> ), median [range]         | 23.2 [15.3 – 43.6]       |
| Maternal age at infant's birth (years), mean (SD) [range] | 34.2 (4.8)<br>[17 – 52]  |
| Maternal ethnicity                                        |                          |
| White                                                     | 272 (53.4)               |
| Black/Black British                                       | 56 (11.0)                |
| Asian/Asian British                                       | 28 (5.5)                 |
| Chinese                                                   | 18 (3.5)                 |
| Mixed – White & Asian                                     | 4 (0.8)                  |
| Mixed – White & Black                                     | 4 (0.8)                  |
| Any other                                                 | 30 (5.9)                 |
| Do not wish to answer                                     | 9 (1.8)                  |
| No data                                                   | 88 (17.3)                |
| Bayley III cognitive composite score, mean (SD) [range]   | 100 (11.4)<br>[55 – 125] |
| CBCL total T score, mean (SD) [range]                     | 46.9 (9.5)<br>[28 – 69]  |
| Q-CHAT total score, mean (SD) [range]                     | 30.5 (9.3)<br>[8 – 70]   |
| EPDS score, median [range]                                | 4 [0 – 28]               |
| EPDS score, n (%)                                         |                          |
| <13                                                       | 415 (8.2)                |
| ≥13                                                       | 21 (4.1)                 |
| No data                                                   | 73 (14.3)                |

<sup>a</sup> Quintile 1 corresponds to the highest, least deprived, IMD rankings.

\* unless otherwise specified

**Table 2: CBCL and Q-CHAT model predictors using multiple imputation without interaction.** (Cf. Supplementary Table 3 for complete case analysis)

|                                             | CBCL                 |           |                | Q-CHAT               |                   |                |
|---------------------------------------------|----------------------|-----------|----------------|----------------------|-------------------|----------------|
|                                             | B [95%CI]            | p         | f <sup>2</sup> | B [95%CI]            | p                 | f <sup>2</sup> |
| <b>Maternal EPDS</b>                        | 0.93 [0.43, 1.44]    | <.001 *** | 0.05           | 0.27 [0.03, 0.52]    | .031 *            | 0.01           |
| <b>Maternal BMI</b>                         | -0.09 [-0.44, 0.26]  | .621      | -              | 0.06 [-0.13, 0.24]   | .538              | -              |
| <b>Multiple pregnancy</b>                   | 3.15 [-3.07, 9.37]   | .320      | -              | 1.33 [-2.62, 5.28]   | .509              | -              |
| <b>Parity</b>                               |                      |           |                |                      |                   |                |
| <b>1</b>                                    | -2.52 [-5.96, 0.93]  | .151      | -              | -2.14 [-4.02, -0.27] | .025 <sup>a</sup> | -              |
| <b>2</b>                                    | -3.23 [-9.16, 2.70]  | .285      | -              | 0.88 [-1.99, 3.75]   | .548              | -              |
| <b>3+</b>                                   | -1.37 [-8.36, 5.61]  | .699      | -              | -0.49 [-4.57, 3.60]  | .815              | -              |
| <b>IMD rank</b>                             | -1.48 [-3.33, 0.37]  | .117      | -              | -1.50 [-2.60, -0.40] | .008 **           | 0.02           |
| <b>Gestational age at birth (weeks)</b>     | 0.10 [-0.65, 0.85]   | .786      | -              | 0.26 [-0.17, 0.70]   | .233              | -              |
| <b>Birthweight (kg)</b>                     | 0.56 [-2.65, 3.78]   | .731      | -              | -1.24 [-2.93, 0.46]  | .151              | -              |
| <b>Sex:female</b>                           | -4.14 [-6.96, -1.31] | .004 **   | 0.06           | -1.95 [-3.42, -0.48] | .009 **           | 0.05           |
| <b>Corrected age at assessment (months)</b> | -0.90 [-2.17, 0.37]  | .166      | -              | -0.16 [-0.91, 0.59]  | .677              | -              |
| <b>Cognition</b>                            | -0.05 [-0.20, 0.09]  | .467      | -              | -0.27 [-0.35, -0.20] | <.001 ***         | 0.12           |

p<0.05 \*; p<0.01 \*\*; p<0.001 \*\*\*

CBCL model adjusted R<sup>2</sup> = 0.0676. Q-CHAT model adjusted R<sup>2</sup> = 0.193.

B = unstandardised coefficient.

CBCL = Child Behaviour Checklist score at 18 months. Q-CHAT = Quantitative Checklist for Autism in Toddlers score at 18 months. Maternal EPDS = maternal Edinburgh Postnatal Depression Scale score at term-equivalent age. Multiple pregnancy = dummy variable of twin/triplet pregnancy. Parity = dummy variable, one/two/three+ previous child(ren). Corrected age at assessment (months) = age at behavioural assessment, corrected for gestational age. Cognition = infant Bayley III score at 18 months.

<sup>a</sup> Wald test of whole parity variable in Q-CHAT model: F(3, 476.9) = 1.88, p = .133

Effect size (Cohen’s f<sup>2</sup>, calculated from squared part correlations for predictors significant to 0.05): 0.02 = small, 0.15 = medium and 0.35 = large.<sup>43</sup>

- indicates data not given, as predictor not significant to 0.05.

**Table 3: CBCL and Q-CHAT model predictors using complete case analysis with interaction of ‘EPDS x term’.**

|                                             | CBCL                 |         | Q-CHAT               |           |
|---------------------------------------------|----------------------|---------|----------------------|-----------|
|                                             | B [95%CI]            | p       | B [95%CI]            | p         |
| <b>Maternal EPDS</b>                        | 0.89 [-0.24, 2.02]   | .121    | 0.24 [-0.28, 0.75]   | .365      |
| <b>Maternal BMI</b>                         | -0.01 [-0.39, 0.37]  | .955    | 0.00 [-0.16, 0.17]   | .982      |
| <b>Multiple pregnancy</b>                   | 1.76 [-6.65, 10.17]  | .681    | 0.97 [-2.07, 4.01]   | .532      |
| <b>Parity</b>                               |                      |         |                      |           |
| <b>1</b>                                    | -2.75 [-6.49, 0.99]  | .149    | -1.42 [-3.30, 0.46]  | .139      |
| <b>2</b>                                    | -3.49 [-10.36, 3.37] | .317    | 0.16 [-2.84, 3.16]   | .917      |
| <b>3+</b>                                   | -1.17 [-9.69, 7.35]  | .788    | -1.13 [-4.24, 1.98]  | .476      |
| <b>IMD rank</b>                             | -1.41 [-3.54, 0.73]  | .195    | -1.68 [-2.64, -0.72] | .001 **   |
| <b>Gestation: term</b>                      | 1.25 [-8.34, 10.85]  | .797    | 2.64 [-1.74, 7.02]   | .236      |
| <b>Birthweight (kg)</b>                     | -1.01 [-4.08, 2.05]  | .516    | -2.25 [-3.73, -0.78] | .003 **   |
| <b>Sex: female</b>                          | -4.64 [-7.83, -1.44] | .005 ** | -2.22 [-3.72, -0.71] | .004 **   |
| <b>Corrected age at assessment (months)</b> | -0.83 [-2.27, 0.62]  | .261    | -0.39 [-1.18, 0.04]  | .335      |
| <b>Cognition</b>                            | -0.03 [-0.20, 0.14]  | .720    | -0.22 [-0.29, -0.15] | <.001 *** |
| <b>EPDS x gestation:term</b>                | -0.01 [-1.30, 1.28]  | .991    | -0.02 [-0.60, 0.56]  | .950      |

p<0.05 \*; p<0.01 \*\*; p<0.001 \*\*\*

CBCL model adjusted R<sup>2</sup> = 0.0865. Q-CHAT model adjusted R<sup>2</sup> = 0.215.

B = unstandardised coefficient.

CBCL = Child Behaviour Checklist score at 18 months. Q-CHAT = Quantitative Checklist for Autism in Toddlers score at 18 months. Maternal EPDS = maternal Edinburgh Postnatal Depression Scale score at term-equivalent age. Multiple pregnancy = dummy variable of twin/triplet pregnancy. Parity = dummy variable, one/two/three+ previous child(ren). Gestation: term = dummy variable, term (≥37 weeks) vs preterm (<37 weeks) gestation at birth.

Corrected age at assessment (months) = age at behavioural assessment, corrected for gestational age. Cognition = infant Bayley III score at 18 months. EPDS x gestation:term = interaction term between maternal EPDS score and term gestation at birth.

**Table 4: Cognition model predictors using multiple imputation.**

|                                             | <b>B [95%CI]</b>     | <b>p</b>          |
|---------------------------------------------|----------------------|-------------------|
| <b>Maternal EPDS</b>                        | -0.22 [-0.50, 0.05]  | .108              |
| <b>Maternal BMI</b>                         | -0.32 [-0.52, -0.13] | .001 **           |
| <b>Multiple pregnancy</b>                   | 1.65 [-2.49, 5.79]   | .433              |
| <b>Parity</b>                               |                      |                   |
| <b>1</b>                                    | -0.46 [-2.67, 1.76]  | .686              |
| <b>2</b>                                    | -3.47 [-6.69, -0.25] | .035 <sup>a</sup> |
| <b>3+</b>                                   | -4.57 [-9.53, 0.40]  | .072              |
| <b>IMD rank</b>                             | 1.43 [0.37, 2.50]    | .009 **           |
| <b>Gestational age at birth (weeks)</b>     | 0.45 [-0.07, 0.96]   | .091              |
| <b>Birthweight (kg)</b>                     | 0.81 [-1.24, 2.87]   | .436              |
| <b>Sex: female</b>                          | 1.99 [0.24, 3.74]    | .026 *            |
| <b>Corrected age at assessment (months)</b> | -0.75 [-1.59, 0.08]  | .075              |
| <b>Q-CHAT score</b>                         | -0.39 [-0.50, -0.28] | <.001 ***         |

p<0.05 \*; p<0.01 \*\*; p<0.001 \*\*\*

Adjusted R<sup>2</sup> = 0.231

B = unstandardised coefficient.

Maternal EPDS = maternal Edinburgh Postnatal Depression Scale score at term-equivalent age.

Multiple pregnancy = dummy variable of twin/triplet pregnancy. Parity = dummy variable, one/two/three+ previous child(ren). Corrected age at assessment (months) = age at behavioural assessment, corrected for gestational age. Cognition = infant Bayley III score at 18 months. Q-CHAT score = infant's Q-CHAT score at 18 month assessment.

<sup>a</sup> Wald test of whole parity variable in cognition model: F(3, 482.9)=2.41, p=0.067

**Fig.1** Children's predicted CBCL scores at 18 months are positively correlated to the maternal EPDS score at term-equivalent age.

**Fig.2** Children's predicted Q-CHAT scores at 18 months are positively correlated to the maternal EPDS score at term-equivalent age.



Fig.1 Children’s predicted CBCL scores at 18 months are positively correlated to the maternal EPDS score at term-equivalent age

158x158mm (220 x 220 DPI)

1  
2  
3  
4  
5  
6  
7  
8  
9  
10  
11  
12  
13  
14  
15  
16  
17  
18  
19  
20  
21  
22  
23  
24  
25  
26  
27  
28  
29  
30  
31  
32  
33  
34  
35  
36  
37  
38  
39  
40  
41  
42  
43  
44  
45  
46  
47  
48  
49  
50  
51  
52  
53  
54  
55  
56  
57  
58  
59  
60



Fig.2 Children’s predicted Q-CHAT scores at 18 months are positively correlated to the maternal EPDS score at term-equivalent age.

158x158mm (220 x 220 DPI)

## **Supplemental material**

**Supplementary Table 1:** CBCL internalising symptom model predictors using multiple imputation.

**Supplementary Table 2:** CBCL externalising symptom model predictors using multiple imputation.

**Supplementary Table 3:** CBCL and Q-CHAT model predictors using complete case analysis without interaction.

**Supplementary Table 4:** EPDS score predictors.

**Supplementary Table 5:** EPDS score predictors including interaction 'term x time-lag'.

**Supplementary Figure 1:** Histogram showing the distribution of maternal EPDS scores at term-equivalent age.



**Supplementary Table 1: CBCL internalising symptom model predictors using multiple imputation.**

|                                             | <b>B [95%CI]</b>     | <b>p</b> | <b>f<sup>2</sup></b> |
|---------------------------------------------|----------------------|----------|----------------------|
| <b>Maternal EPDS</b>                        | 0.22 [0.08, 0.36]    | .003 **  | 0.03                 |
| <b>Maternal BMI</b>                         | -0.04 [-0.13, 0.06]  | .436     | -                    |
| <b>Multiple pregnancy</b>                   | 0.58 [-1.10, 2.27]   | .497     | -                    |
| <b>Parity</b>                               |                      |          |                      |
| <b>1</b>                                    | -0.37 [-1.41, 0.67]  | .487     | -                    |
| <b>2</b>                                    | -1.33 [-3.09, 0.42]  | .136     | -                    |
| <b>3+</b>                                   | 0.64 [-1.34, 2.62]   | .524     | -                    |
| <b>IMD rank</b>                             | -0.41 [-0.91, 0.10]  | .115     | -                    |
| <b>Gestational age at birth (weeks)</b>     | 0.22 [-0.00, 0.44]   | .053     | -                    |
| <b>Birthweight (kg)</b>                     | -0.97 [-1.90, -0.05] | .038 *   | 0.005                |
| <b>Sex: female</b>                          | -0.51 [-1.35, 0.33]  | .232     | -                    |
| <b>Corrected age at assessment (months)</b> | 0.02 [-0.41, 0.45]   | .923     | -                    |
| <b>Cognition</b>                            | -0.05 [-0.10, -0.01] | .016 *   | 0.01                 |

p<0.05 \*; p<0.01 \*\*; p<0.001 \*\*\*

Adjusted R<sup>2</sup> = 0.0566.

B = unstandardised coefficient.

Outcome variable = Child Behaviour Checklist internalising sub-score at 18 months. Maternal EPDS = maternal Edinburgh Postnatal Depression Scale score at term-equivalent age. Multiple pregnancy = dummy variable of twin/triplet pregnancy. Parity = dummy variable, one/two/three+ previous child(ren). Corrected age at assessment (months) = age at behavioural assessment, corrected for gestational age. Cognition = infant Bayley III score at 18 months.

Effect size (Cohen's f<sup>2</sup>, calculated from squared part correlations for predictors significant to 0.05): 0.02 = small, 0.15 = medium and 0.35 = large.<sup>1</sup>

- indicates data not given, as predictor not significant to 0.05.

**Supplementary Table 2: CBCL externalising symptom model predictors using multiple imputation.**

|                                             | <b>B [95%CI]</b>     | <b>p</b>  | <b>f<sup>2</sup></b> |
|---------------------------------------------|----------------------|-----------|----------------------|
| <b>Maternal EPDS</b>                        | 0.40 [0.20, 0.61]    | <.001 *** | 0.05                 |
| <b>Maternal BMI</b>                         | 0.01 [-0.17, 0.15]   | .933      | -                    |
| <b>Multiple pregnancy</b>                   | 2.51 [-0.29, 5.31]   | .079      | -                    |
| <b>Parity</b>                               |                      |           |                      |
| <b>1</b>                                    | -1.06 [-2.53, 0.42]  | .160      | -                    |
| <b>2</b>                                    | -0.61 [-3.55, 2.33]  | .682      | -                    |
| <b>3+</b>                                   | -0.96 [-4.47, 2.56]  | .593      | -                    |
| <b>IMD rank</b>                             | -0.24 [-1.11, 0.63]  | .585      | -                    |
| <b>Gestational age at birth (weeks)</b>     | -0.07 [-0.40, 0.27]  | .701      | -                    |
| <b>Birthweight (kg)</b>                     | 1.03 [-0.38, 2.44]   | .153      | -                    |
| <b>Sex: female</b>                          | -1.80 [-3.07, -0.53] | .006 **   | 0.06                 |
| <b>Corrected age at assessment (months)</b> | -0.40 [-0.95, 0.16]  | .161      | -                    |
| <b>Cognition</b>                            | 0.03 [-0.03, 0.10]   | .322      | -                    |

p<0.05 \*; p<0.01 \*\*; p<0.001 \*\*\*

Adjusted R<sup>2</sup> = 0.0612.

B = unstandardised coefficient.

Outcome variable = Child Behaviour Checklist externalising sub-score at 18 months. Maternal EPDS = maternal Edinburgh Postnatal

Depression Scale score at term-equivalent age. Multiple pregnancy = dummy variable of twin/triplet pregnancy. Parity = dummy variable, one/two/three+ previous child(ren). Corrected age at assessment (months) = age at behavioural assessment, corrected for gestational age.

Cognition = infant Bayley III score at 18 months.

Effect size (Cohen's f<sup>2</sup>, calculated from squared part correlations for predictors significant to 0.05): 0.02 = small, 0.15 = medium and 0.35 = large.<sup>1</sup>

- indicates data not given, as predictor not significant to 0.05.

**Supplementary Table 3: CBCL and Q-CHAT model predictors using complete case analysis without interaction.**

|                                             | CBCL                 |         | Q-CHAT               |           |
|---------------------------------------------|----------------------|---------|----------------------|-----------|
|                                             | B [95%CI]            | p       | B [95%CI]            | p         |
| <b>Maternal EPDS</b>                        | 0.88 [0.35, 1.41]    | .001 ** | 0.21 [-0.02, 0.44]   | .069      |
| <b>Maternal BMI</b>                         | -0.01 [-0.38, 0.37]  | .963    | 0.01 [-0.16, 0.17]   | .930      |
| <b>Multiple pregnancy</b>                   | 1.50 [-6.87, 9.87]   | .724    | 0.43 [-2.50, 3.37]   | .772      |
| <b>Parity</b>                               |                      |         |                      |           |
| <b>1</b>                                    | -2.83 [-6.60, 0.94]  | .141    | -1.54 [-3.41, 0.34]  | .108      |
| <b>2</b>                                    | -3.49 [-10.3, 3.35]  | .316    | 0.13 [-2.85, 3.10]   | .933      |
| <b>3+</b>                                   | -1.38 [-10.0, 7.30]  | .755    | -1.43 [-4.50, 1.64]  | .360      |
| <b>IMD rank</b>                             | -1.44 [-3.56, 0.67]  | .181    | -1.75 [-2.70, -0.79] | <.001 *** |
| <b>Gestational age at birth (weeks)</b>     | 0.01 [-0.90, 0.91]   | .987    | 0.10 [-0.33, 0.54]   | .639      |
| <b>Birthweight (kg)</b>                     | -0.65 [-4.38, 3.08]  | .733    | -1.81 [-3.63, 0.00]  | .050      |
| <b>Sex: female</b>                          | -4.57 [-7.82, -1.31] | .006 ** | -2.12 [-3.60, -0.64] | .005 **   |
| <b>Corrected age at assessment (months)</b> | -0.84 [-2.26, 0.59]  | .247    | -0.41 [-1.18, 0.35]  | .290      |
| <b>Cognition</b>                            | -0.03 [-0.20, 0.13]  | .689    | -0.23 [-0.30, -0.15] | <.001 *** |

p<0.05 \*; p<0.01 \*\*; p<0.001 \*\*\*

CBCL adjusted R<sup>2</sup> = 0.0862. Q-CHAT adjusted R<sup>2</sup> = 0.2103.

B = unstandardised coefficient.

CBCL = Child Behaviour Checklist externalising sub-score at 18 months. Q-CHAT = Quantitative Checklist for Autism in Toddlers score at 18 months. Maternal EPDS = maternal Edinburgh Postnatal Depression Scale score at term-equivalent age. Multiple pregnancy = dummy variable of twin/triplet pregnancy. Parity = dummy variable, one/two/three+ previous child(ren). Gestation (weeks) = dummy variable: 34-36+6 weeks and ≥37 weeks gestation at birth. Corrected age at assessment (months) = age at behavioural assessment, corrected for gestational age. Cognition = infant Bayley III score at 18 months.

**Supplementary Table 4: EPDS score predictors.**

|                           | <b>IRR [95%CI]</b> | <b>p</b> |
|---------------------------|--------------------|----------|
| <b>Time-lag (weeks)</b>   | 1.01 [0.97, 1.05]  | .647     |
| <b>Gestation:term</b>     | 0.91 [0.64, 1.31]  | .627     |
| <b>IMD rank</b>           | 1.00 [1.00, 1.00]  | .103     |
| <b>Multiple pregnancy</b> | 0.66 [0.46, 0.96]  | .031 *   |
| <b>Parity</b>             |                    |          |
| <b>1</b>                  | 0.79 [0.66, 0.95]  | .011 *   |
| <b>2</b>                  | 0.87 [0.60, 1.28]  | .491     |
| <b>3+</b>                 | 0.84 [0.54, 1.31]  | .445     |
| <b>Birthweight (kg)</b>   | 0.98 [0.83, 1.17]  | .847     |
| <b>Sex:female</b>         | 1.13 [0.98, 1.31]  | .098     |

p<0.05 \*; p<0.01 \*\*; p<0.001 \*\*\*

Pseudo R<sup>2</sup> = 0.0228

IRR = incidence rate ratio

Outcome variable = maternal Edinburgh Postnatal Depression Scale (EPDS) score at term-equivalent age. Time-lag (weeks) = time in weeks between birth and EPDS assessment. Gestation:term = dummy variable, term (≥37 weeks) vs preterm (<37 weeks) gestation at birth. Multiple pregnancy = dummy variable of twin/triplet pregnancy. Parity = dummy variable, one/two/three+ previous child(ren).

**Supplementary Table 5:** EPDS score predictors including interaction ‘term x time-lag’.

|                                | <b>IRR [95%CI]</b> | <b>p</b> |
|--------------------------------|--------------------|----------|
| <b>Time-lag (weeks)</b>        | 1.00 [0.97, 1.04]  | .823     |
| <b>Gestation: term</b>         | 0.88 [0.58, 1.34]  | .553     |
| <b>IMD rank</b>                | 1.00 [1.00, 1.00]  | .104     |
| <b>Multiple pregnancy</b>      | 0.66 [0.46, 0.96]  | .029 *   |
| <b>Parity</b>                  |                    |          |
| <b>1</b>                       | 0.79 [0.66, 0.95]  | .010 *   |
| <b>2</b>                       | 0.87 [0.60, 1.28]  | .480     |
| <b>3+</b>                      | 0.85 [0.55, 1.31]  | .458     |
| <b>Birthweight (kg)</b>        | 0.97 [0.83, 1.15]  | .756     |
| <b>Sex:female</b>              | 1.13 [0.98, 1.30]  | .100     |
| <b>Term x time-lag (weeks)</b> | 1.01 [0.94, 1.10]  | .735     |

p<0.05 \*; p<0.01 \*\*; p<0.001 \*\*\*

Pseudo R<sup>2</sup> = 0.0230

IRR = incidence rate ratio

Outcome variable = maternal Edinburgh Postnatal Depression Scale (EPDS) score at term-equivalent age. Time-lag (weeks) = time in weeks between birth and EPDS assessment. Gestation: term = dummy variable, term (≥37 weeks) vs preterm (<37 weeks) gestation at birth. Multiple pregnancy = dummy variable of twin/triplet pregnancy. Parity = dummy variable, one/two/three+ previous child(ren). Term x time-lag (weeks): interaction term between term gestation at birth and time-lag between birth and maternal EPDS assessment.

**Supplementary Figure 1:** Histogram showing the distribution of maternal EPDS scores at term-equivalent age.

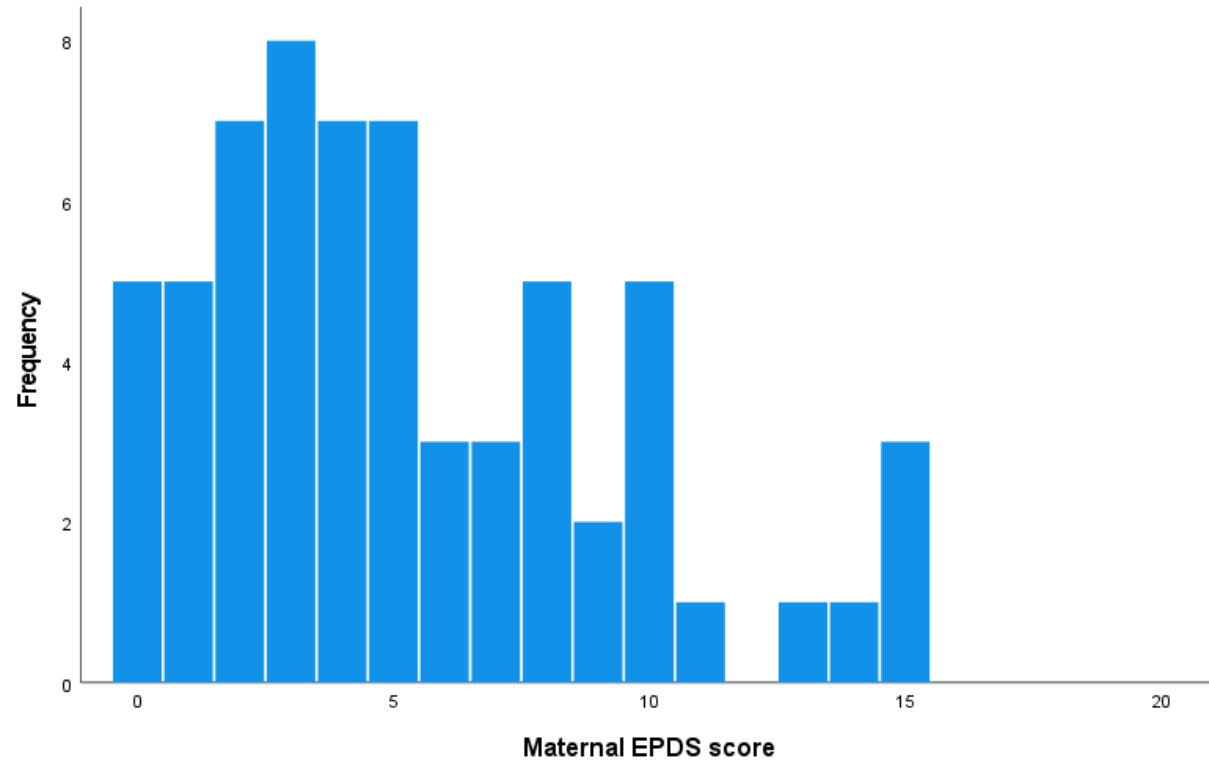

1  
2  
3 **Supplemental reference list**  
4

- 5 1. Cohen J. *Statistical Power Analysis for the Behavioral Sciences*. 2nd ed. L. Erlbaum Associates; 1988.  
6  
7  
8  
9  
10  
11  
12  
13  
14  
15  
16  
17  
18  
19  
20  
21  
22  
23  
24  
25  
26  
27  
28  
29  
30  
31  
32  
33  
34  
35  
36  
37  
38  
39  
40  
41  
42  
43  
44  
45  
46

For peer review only

STROBE Statement—Checklist of items that should be included in reports of *cohort studies*

|                              | Item No | Recommendation                                                                                                                                                                                                                                                                                                         | Page No |
|------------------------------|---------|------------------------------------------------------------------------------------------------------------------------------------------------------------------------------------------------------------------------------------------------------------------------------------------------------------------------|---------|
| <b>Title and abstract</b>    | 1       | (a) Indicate the study's design with a commonly used term in the title or the abstract<br>(b) Provide in the abstract an informative and balanced summary of what was done and what was found                                                                                                                          | 1, 2    |
| <b>Introduction</b>          |         |                                                                                                                                                                                                                                                                                                                        |         |
| Background/rationale         | 2       | Explain the scientific background and rationale for the investigation being reported                                                                                                                                                                                                                                   | 5, 6    |
| Objectives                   | 3       | State specific objectives, including any prespecified hypotheses                                                                                                                                                                                                                                                       | 6       |
| <b>Methods</b>               |         |                                                                                                                                                                                                                                                                                                                        |         |
| Study design                 | 4       | Present key elements of study design early in the paper                                                                                                                                                                                                                                                                | 6, 7    |
| Setting                      | 5       | Describe the setting, locations, and relevant dates, including periods of recruitment, exposure, follow-up, and data collection                                                                                                                                                                                        | 7       |
| Participants                 | 6       | (a) Give the eligibility criteria, and the sources and methods of selection of participants. Describe methods of follow-up<br>(b) For matched studies, give matching criteria and number of exposed and unexposed                                                                                                      | 7       |
| Variables                    | 7       | Clearly define all outcomes, exposures, predictors, potential confounders, and effect modifiers. Give diagnostic criteria, if applicable                                                                                                                                                                               | 7, 8    |
| Data sources/<br>measurement | 8*      | For each variable of interest, give sources of data and details of methods of assessment (measurement). Describe comparability of assessment methods if there is more than one group                                                                                                                                   | 7, 8    |
| Bias                         | 9       | Describe any efforts to address potential sources of bias                                                                                                                                                                                                                                                              | 9       |
| Study size                   | 10      | Explain how the study size was arrived at                                                                                                                                                                                                                                                                              | 7       |
| Quantitative variables       | 11      | Explain how quantitative variables were handled in the analyses. If applicable, describe which groupings were chosen and why                                                                                                                                                                                           | 9, 10   |
| Statistical methods          | 12      | (a) Describe all statistical methods, including those used to control for confounding<br>(b) Describe any methods used to examine subgroups and interactions<br>(c) Explain how missing data were addressed<br>(d) If applicable, explain how loss to follow-up was addressed<br>(e) Describe any sensitivity analyses | 9, 10   |
| <b>Results</b>               |         |                                                                                                                                                                                                                                                                                                                        |         |
| Participants                 | 13*     | (a) Report numbers of individuals at each stage of study—eg numbers potentially eligible, examined for eligibility, confirmed eligible, included in the study, completing follow-up, and analysed<br>(b) Give reasons for non-participation at each stage<br>(c) Consider use of a flow diagram                        | 11      |
| Descriptive data             | 14*     | (a) Give characteristics of study participants (eg demographic, clinical, social) and information on exposures and potential confounders<br>(b) Indicate number of participants with missing data for each variable of interest<br>(c) Summarise follow-up time (eg, average and total amount)                         | 11      |
| Outcome data                 | 15*     | Report numbers of outcome events or summary measures over time                                                                                                                                                                                                                                                         | 11, 12  |



|    |                          |    |                                                                                                                                                                                                              |                  |
|----|--------------------------|----|--------------------------------------------------------------------------------------------------------------------------------------------------------------------------------------------------------------|------------------|
| 1  | Main results             | 16 | (a) Give unadjusted estimates and, if applicable, confounder-adjusted estimates and their precision (eg, 95% confidence interval). Make clear which confounders were adjusted for and why they were included | 11,<br>12,<br>13 |
| 2  |                          |    | (b) Report category boundaries when continuous variables were categorized                                                                                                                                    |                  |
| 3  |                          |    | (c) If relevant, consider translating estimates of relative risk into absolute risk for a meaningful time period                                                                                             |                  |
| 4  |                          |    |                                                                                                                                                                                                              |                  |
| 5  |                          |    |                                                                                                                                                                                                              |                  |
| 6  |                          |    |                                                                                                                                                                                                              |                  |
| 7  |                          |    |                                                                                                                                                                                                              |                  |
| 8  |                          |    |                                                                                                                                                                                                              |                  |
| 9  | Other analyses           | 17 | Report other analyses done—eg analyses of subgroups and interactions, and sensitivity analyses                                                                                                               | 11,<br>12,<br>13 |
| 10 |                          |    |                                                                                                                                                                                                              |                  |
| 11 |                          |    |                                                                                                                                                                                                              |                  |
| 12 | <b>Discussion</b>        |    |                                                                                                                                                                                                              |                  |
| 13 | Key results              | 18 | Summarise key results with reference to study objectives                                                                                                                                                     | 13               |
| 14 | Limitations              | 19 | Discuss limitations of the study, taking into account sources of potential bias or imprecision. Discuss both direction and magnitude of any potential bias                                                   | 15-<br>17        |
| 15 |                          |    |                                                                                                                                                                                                              |                  |
| 16 |                          |    |                                                                                                                                                                                                              |                  |
| 17 | Interpretation           | 20 | Give a cautious overall interpretation of results considering objectives, limitations, multiplicity of analyses, results from similar studies, and other relevant evidence                                   | 17               |
| 18 |                          |    |                                                                                                                                                                                                              |                  |
| 19 |                          |    |                                                                                                                                                                                                              |                  |
| 20 | Generalisability         | 21 | Discuss the generalisability (external validity) of the study results                                                                                                                                        | 15-<br>17        |
| 21 |                          |    |                                                                                                                                                                                                              |                  |
| 22 | <b>Other information</b> |    |                                                                                                                                                                                                              |                  |
| 23 | Funding                  | 22 | Give the source of funding and the role of the funders for the present study and, if applicable, for the original study on which the present article is based                                                | 3                |
| 24 |                          |    |                                                                                                                                                                                                              |                  |
| 25 |                          |    |                                                                                                                                                                                                              |                  |
| 26 |                          |    |                                                                                                                                                                                                              |                  |

27 \*Give information separately for exposed and unexposed groups.

28  
29 **Note:** An Explanation and Elaboration article discusses each checklist item and gives methodological background and  
30 published examples of transparent reporting. The STROBE checklist is best used in conjunction with this article (freely  
31 available on the Web sites of PLoS Medicine at <http://www.plosmedicine.org/>, Annals of Internal Medicine at  
32 <http://www.annals.org/>, and Epidemiology at <http://www.epidem.com/>). Information on the STROBE Initiative is  
33 available at <http://www.strobe-statement.org>.  
34  
35  
36  
37  
38  
39  
40  
41  
42  
43  
44  
45  
46  
47  
48  
49  
50  
51  
52  
53  
54  
55  
56  
57  
58  
59  
60

# BMJ Open

## Postnatal maternal depressive symptoms and behavioural outcomes in term- and preterm-born toddlers: a longitudinal UK community cohort study.

|                                 |                                                                                                                                                                                                                                                                                                                                                                                                                                                                                                                                                                                                                                                                                                                                                                                                                                                                                                                                                                                                                                                                                                                                                                                                                                                                                                                                                                                                                                                                                                                                                                                                                                                                                                                                                                                      |
|---------------------------------|--------------------------------------------------------------------------------------------------------------------------------------------------------------------------------------------------------------------------------------------------------------------------------------------------------------------------------------------------------------------------------------------------------------------------------------------------------------------------------------------------------------------------------------------------------------------------------------------------------------------------------------------------------------------------------------------------------------------------------------------------------------------------------------------------------------------------------------------------------------------------------------------------------------------------------------------------------------------------------------------------------------------------------------------------------------------------------------------------------------------------------------------------------------------------------------------------------------------------------------------------------------------------------------------------------------------------------------------------------------------------------------------------------------------------------------------------------------------------------------------------------------------------------------------------------------------------------------------------------------------------------------------------------------------------------------------------------------------------------------------------------------------------------------|
| Journal:                        | <i>BMJ Open</i>                                                                                                                                                                                                                                                                                                                                                                                                                                                                                                                                                                                                                                                                                                                                                                                                                                                                                                                                                                                                                                                                                                                                                                                                                                                                                                                                                                                                                                                                                                                                                                                                                                                                                                                                                                      |
| Manuscript ID                   | bmjopen-2021-058540.R2                                                                                                                                                                                                                                                                                                                                                                                                                                                                                                                                                                                                                                                                                                                                                                                                                                                                                                                                                                                                                                                                                                                                                                                                                                                                                                                                                                                                                                                                                                                                                                                                                                                                                                                                                               |
| Article Type:                   | Original research                                                                                                                                                                                                                                                                                                                                                                                                                                                                                                                                                                                                                                                                                                                                                                                                                                                                                                                                                                                                                                                                                                                                                                                                                                                                                                                                                                                                                                                                                                                                                                                                                                                                                                                                                                    |
| Date Submitted by the Author:   | 26-May-2022                                                                                                                                                                                                                                                                                                                                                                                                                                                                                                                                                                                                                                                                                                                                                                                                                                                                                                                                                                                                                                                                                                                                                                                                                                                                                                                                                                                                                                                                                                                                                                                                                                                                                                                                                                          |
| Complete List of Authors:       | <p>Kleine, Ira; King's College London, Centre for the Developing Brain, School of Bioengineering and Imaging Sciences, Faculty of Life Sciences &amp; Medicine</p> <p>Vamvakas, George; King's College London, Department of Biostatistics and Health Informatics, Institute of Psychiatry, Psychology and Neuroscience</p> <p>Lautarescu, Alexandra; King's College London, Centre for the Developing Brain, School of Bioengineering and Imaging Sciences, Faculty of Life Sciences &amp; Medicine; King's College London, Forensic and Neurodevelopmental Sciences, Institute of Psychiatry, Psychology and Neuroscience</p> <p>Falconer, Shona; King's College London, Centre for the Developing Brain, School of Bioengineering and Imaging Sciences, Faculty of Life Sciences &amp; Medicine</p> <p>Chew, Andrew; King's College London, Centre for the Developing Brain, School of Bioengineering and Imaging Sciences, Faculty of Life Sciences &amp; Medicine</p> <p>Counsell, Serena ; King's College London, Centre for the Developing Brain, School of Bioengineering and Imaging Sciences, Faculty of Life Sciences &amp; Medicine</p> <p>Pickles, Andrew; King's College London, Department of Biostatistics and Health Informatics, Institute of Psychiatry, Psychology and Neuroscience</p> <p>Edwards, David; King's College London, Centre for the Developing Brain, School of Bioengineering and Imaging Sciences, Faculty of Life Sciences &amp; Medicine</p> <p>Nosarti, Chiara; King's College London, Centre for the Developing Brain, School of Bioengineering and Imaging Sciences, Faculty of Life Sciences &amp; Medicine; King's College London, Department of Child and Adolescent Psychiatry, Institute of Psychiatry, Psychology and Neuroscience</p> |
| <b>Primary Subject Heading</b>: | Mental health                                                                                                                                                                                                                                                                                                                                                                                                                                                                                                                                                                                                                                                                                                                                                                                                                                                                                                                                                                                                                                                                                                                                                                                                                                                                                                                                                                                                                                                                                                                                                                                                                                                                                                                                                                        |
| Secondary Subject Heading:      | Paediatrics                                                                                                                                                                                                                                                                                                                                                                                                                                                                                                                                                                                                                                                                                                                                                                                                                                                                                                                                                                                                                                                                                                                                                                                                                                                                                                                                                                                                                                                                                                                                                                                                                                                                                                                                                                          |
| Keywords:                       | MENTAL HEALTH, Child & adolescent psychiatry < PSYCHIATRY, Developmental neurology & neurodisability < PAEDIATRICS, Depression & mood disorders < PSYCHIATRY, NEONATOLOGY                                                                                                                                                                                                                                                                                                                                                                                                                                                                                                                                                                                                                                                                                                                                                                                                                                                                                                                                                                                                                                                                                                                                                                                                                                                                                                                                                                                                                                                                                                                                                                                                            |

1  
2  
3  
4  
5  
6  
7  
8  
9  
10  
11  
12  
13  
14  
15  
16  
17  
18  
19  
20  
21  
22  
23  
24  
25  
26  
27  
28  
29  
30  
31  
32  
33  
34  
35  
36  
37  
38  
39  
40  
41  
42  
43  
44  
45  
46  
47  
48  
49  
50  
51  
52  
53  
54  
55  
56  
57  
58  
59  
60



SCHOLARONE™  
Manuscripts



I, the Submitting Author has the right to grant and does grant on behalf of all authors of the Work (as defined in the below author licence), an exclusive licence and/or a non-exclusive licence for contributions from authors who are: i) UK Crown employees; ii) where BMJ has agreed a CC-BY licence shall apply, and/or iii) in accordance with the terms applicable for US Federal Government officers or employees acting as part of their official duties; on a worldwide, perpetual, irrevocable, royalty-free basis to BMJ Publishing Group Ltd ("BMJ") its licensees and where the relevant Journal is co-owned by BMJ to the co-owners of the Journal, to publish the Work in this journal and any other BMJ products and to exploit all rights, as set out in our [licence](#).

The Submitting Author accepts and understands that any supply made under these terms is made by BMJ to the Submitting Author unless you are acting as an employee on behalf of your employer or a postgraduate student of an affiliated institution which is paying any applicable article publishing charge ("APC") for Open Access articles. Where the Submitting Author wishes to make the Work available on an Open Access basis (and intends to pay the relevant APC), the terms of reuse of such Open Access shall be governed by a Creative Commons licence – details of these licences and which [Creative Commons](#) licence will apply to this Work are set out in our licence referred to above.

Other than as permitted in any relevant BMJ Author's Self Archiving Policies, I confirm this Work has not been accepted for publication elsewhere, is not being considered for publication elsewhere and does not duplicate material already published. I confirm all authors consent to publication of this Work and authorise the granting of this licence.

1  
2  
3  
4  
5  
6  
7  
8  
9  
10  
11  
12  
13  
14  
15  
16  
17  
18  
19  
20  
21  
22  
23  
24  
25  
26  
27  
28  
29  
30  
31  
32  
33  
34  
35  
36  
37  
38  
39  
40  
41  
42  
43  
44  
45  
46  
47  
48  
49  
50  
51  
52  
53  
54  
55  
56  
57  
58  
59  
60

1 **Postnatal maternal depressive symptoms and behavioural outcomes in term- and**  
2 **preterm-born toddlers: a longitudinal UK community cohort study.**

3 Kleine, I<sup>a</sup> (MBBS); Vamvakas, G<sup>b</sup> (MSc); Lautarescu A<sup>a,c</sup> (MPhil); Falconer, S<sup>a</sup> (PhD); Chew  
4 A<sup>a</sup> (MD); Counsell SJ<sup>a</sup> (PhD); Pickles, A<sup>b</sup> (FMedSci); Edwards, AD<sup>a</sup> (FMedSci); Nosarti, C<sup>a,d</sup>  
5 (PhD).

6  
7 <sup>a</sup> Centre for the Developing Brain, School of Bioengineering and Imaging Sciences, Faculty  
8 of Life Sciences & Medicine, King's College London, St Thomas' Hospital, London SE1  
9 7EH, UK.

10 <sup>b</sup> Department of Biostatistics and Health Informatics, Institute of Psychiatry, Psychology and  
11 Neuroscience, King's College London, London SE5 8AF, UK.

12 <sup>c</sup> Forensic and Neurodevelopmental Sciences, Institute of Psychiatry, Psychology and  
13 Neuroscience, King's College London, London SE5 8AF, UK.

14 <sup>d</sup> Department of Child and Adolescent Psychiatry, Institute of Psychiatry, Psychology and  
15 Neuroscience, King's College London, London SE5 8AF, UK.

16  
17 **Post-publication corresponding author's contact information**

18 Prof Chiara Nosarti

19 Centre for the Developing Brain, School of Bioengineering and Imaging Sciences

20 King's College London

21 St Thomas' Hospital

22 London

23 SE1 7EH

24 UK

25 chiara.nosarti@kcl.ac.uk

26 +44 (0)207 848 0133

1  
2  
3 35 **Abstract**

4 36 **Objectives:** To examine the association between maternal depressive symptoms in the  
5 37 immediate postnatal period and offspring's behavioural outcomes in a large cohort of term-  
6 38 and preterm-born toddlers.

7 39 **Design and Participants:** Data were drawn from the Developing Human Connectome  
8 40 Project. Maternal postnatal depressive symptoms were assessed at term-equivalent age, and  
9 41 children's outcomes were evaluated at a median corrected age of 18.4 months (range 17.3 –  
10 42 24.3).

11 43 **Exposure and outcomes:** Preterm birth was defined as <37 weeks completed gestation.  
12 44 Maternal depressive symptoms were assessed with the Edinburgh Postnatal Depression Scale  
13 45 (EPDS). Toddlers' outcome measures were parent-rated Child Behaviour Checklist 1<sup>1/2</sup>-5  
14 46 Total (CBCL) and Quantitative Checklist for Autism in Toddlers (Q-CHAT) scores.  
15 47 Toddlers' cognition was assessed with the Bayley Scales of Infant and Toddler Development  
16 48 – Third Edition (Bayley-III).

17 49 **Results:** Higher maternal EPDS scores were associated with toddlers' higher CBCL (B=0.93,  
18 50 95% CI 0.43-1.44, p<0.001, f<sup>2</sup>=0.05) and Q-CHAT scores (B=0.27, 95% CI 0.03-0.52,  
19 51 p=.031, f<sup>2</sup>=0.01). Maternal EPDS, toddlers' CBCL and Q-CHAT scores did not differ  
20 52 between preterm (n=97; 19.1% of the total sample) and term participants. Maternal EPDS  
21 53 score did not disproportionately affect preterm children with respect to CBCL or Q-CHAT  
22 54 scores.

23 55 **Conclusions:** Our findings indicate that children whose mothers reported increased  
24 56 depressive symptoms in the early postnatal period, including subclinical symptoms, exhibit  
25 57 more parent-reported behavioural problems in toddlerhood. These associations were  
26 58 independent of gestational age. Further research is needed to confirm the clinical significance  
27 59 of these findings.  
28 60  
29 61  
30 62  
31 63  
32 64  
33 65  
34 66  
35 67  
36 68

### **Strengths and limitations of this study**

- Prospective study with a large sample, using multiple imputation to reduce non-response bias.
- Maternal depressive symptoms assessed as a continuous variable, providing more nuanced information about the significance of subclinical symptoms.
- Maternal depressive symptoms assessed earlier than in previous studies, enabling recognition of early screening opportunities for families.
- Potential common method variance bias through parent-completed child behavioural assessments.
- Unknown paternal and parental factors, such as comorbid psychiatric conditions, that may confound our findings.

### **Keywords**

Postpartum Depression; Child Development; Autism; Mental Health; Child Behavior; Mood Disorder; Preterm Birth.

### **Declarations**

#### **Funding**

The DHCP project was funded by the European Research Council under the European Union Seventh Framework Programme (FR/2007-2013)/ERC Grant Agreement no. 319456. The authors acknowledge infrastructure support from the National Institute for Health Research Mental Health Biomedical Research Centre at South London, Maudsley NHS Foundation Trust, King's College London, the National Institute for Health Research Mental Health Biomedical Research Centre at Guys, and St Thomas' Hospitals NHS Foundation Trust. The study was also supported in part by the Engineering and Physical Sciences Research Council / Wellcome Trust Centre for Medical Engineering at King's College London (grant WT 203148/Z/16/Z) and the Medical Research Council (UK) (grants MR/K006355/1 and MR/L011530/1) and the MRC Centre for Neurodevelopmental Disorders at King's College London. AP receives a NIHR SI award (NF-SI-0617-10120). AL is supported by the UK Medical Research Council (MR/N013700) and King's College London member of the MRC Doctoral Training Partnership in Biomedical Sciences. The views expressed are those of the authors and not necessarily those of the NHS, the NIHR, or the Department of Health and Social Care.

1  
2  
3 102 **Conflict of interest / Competing interests**  
4

5 103 ADE received financial support from the EU-AIMS-Trials (European Research Council  
6 under the European Union Seventh Framework Programme) as co-Principal Investigator.  
7

8 105 ADE received consulting fees from Chiesi Farmaceutici (advice on neuroprotection in  
9 newborn infants) and Medtronic (unpaid participation in scientific advice committee). ADE  
10 106  
11 107 has a patent on Xenon as an organ protectant (No P023708WO). ADE was Chair of the Data  
12 108  
13 Monitoring and Ethics Committee for the Baby-Oscar Trial, and served on the Data  
14 109  
15 Monitoring and Ethics Committee for the PAEN Trial.  
16

17 110

18  
19 111 There are no other relationships or activities that could appear to have influenced the  
20 112 submitted work.  
21

22 113

23  
24 114 **Availability of data and material**

25 115 Research data are available upon reasonable request.  
26

27 116

28  
29 117 **Code availability**

30 118 Not applicable.  
31

32 119

33  
34 120 **Ethics approval**

35  
36 121 This study was approved by the UK National Research Ethics Authority (14/LO/1169) and  
37 122 conducted in accordance with the World Medical Association's Code of Ethics (Declaration  
38 of Helsinki).  
39 123

40 124

41  
42  
43 125 **Consent to participate**

44 126 Written informed consent was given by children's carer(s) at recruitment into the study.  
45

46 127

47  
48 128 **Consent for publication**

49 129 Not applicable.  
50

51 130

52 131

53 132

54 133

55 134

56 135



## 136 **Introduction**

137 Postnatal depression affects approximately 12% of mothers worldwide.<sup>1</sup> In contrast to ‘baby  
138 blues’, which is a state of emotional lability that affects between 13.7%-76.0% of women in  
139 the first few days after birth and typically resolves spontaneously within two weeks,<sup>2</sup>  
140 postnatal depression is more severe and starts in the first few months post-partum<sup>1</sup>. Stressful  
141 life events have been linked to a heightened risk of developing postnatal depression;<sup>3</sup> for  
142 example, mothers of preterm infants have a significantly higher risk of postpartum depression  
143 compared to mothers of term infants,<sup>4</sup> likely due to heightened stress associated with  
144 perinatal complications.<sup>5</sup>

145  
146 Women with postnatal depression tend to be less responsive to their baby’s needs and to  
147 display less affection.<sup>6</sup> Therefore, in the short-term postpartum depression may affect mother-  
148 infant interactions<sup>7</sup> and in the long-term it may lead to alterations in brain development,<sup>8</sup>  
149 emotional difficulties,<sup>9</sup> less secure attachment, cognitive and behavioural problems in  
150 childhood, and a possible increased risk of autism spectrum disorder (ASD).<sup>10,11</sup> Large cohort  
151 studies, such as the Avon Longitudinal Study of Parents and Children (ALSPAC), have  
152 shown that these associations are even evident when maternal depression is measured on a  
153 continuum of symptoms rather than a dichotomous diagnosis,<sup>12-14</sup> supporting the notion that  
154 elevated sub-diagnostic psychiatric symptoms can also negatively impact on children’s  
155 development.<sup>15</sup>

156  
157 Studies investigating the underlying causes that may link maternal postnatal depression to  
158 child outcomes have implicated several biological and environmental variables. For instance,  
159 genetic and epigenetic factors have been shown to both mediate and mitigate the  
160 intergenerational transmission of psychiatric disorders,<sup>16</sup> while lower quality parenting,  
161 interparental conflict, and socioeconomic deprivation have been shown to exacerbate  
162 children’s developmental risk of emotional and behavioural problems.<sup>11</sup> In addition, being  
163 born preterm (i.e. <37 weeks’ gestation, as per the World Health Organization definition<sup>17</sup>)  
164 has been associated with alterations in early brain development,<sup>18</sup> as well as neurological,  
165 behavioural and cognitive problems in childhood and beyond.<sup>19,20</sup> Therefore, it is complex to  
166 disentangle the possible effects of postnatal maternal mental health and those of perinatal  
167 clinical factors on specific outcomes in preterm children, as these may involve both maternal  
168 psychosocial and biological variables, as well as child preterm-related neurodevelopmental  
169 morbidity.

170

171 Furthermore, a question that remains unanswered is whether preterm birth accentuates the  
172 association between maternal postnatal depression and child outcome. Two theoretical  
173 frameworks exist that hypothesise certain infants may be influenced differently by external  
174 stimuli: the diathesis stress model proposes that certain vulnerability factors make affected  
175 infants more prone to suboptimal environmental influences with subsequent poorer  
176 outcomes,<sup>21,22</sup> whereas the differential susceptibility model frames such factors as plasticity-  
177 mediating, thus leading to poorer outcomes in negative environments, as well as better  
178 outcomes in supportive environments.<sup>22,23</sup> Previous studies investigating differential  
179 susceptibility have shown mixed findings studying a range of environmental and clinical  
180 exposures,<sup>24,25</sup> with child outcomes including attachment, internalising and externalising  
181 behaviour, and academic competence.<sup>25</sup> Both low birthweight in term infants (small for  
182 gestational age, SGA)<sup>26</sup> and preterm birth (PTB)<sup>23,24,27</sup> have been explored as distinct  
183 potential susceptibility factors. This distinction is based on the different pathophysiological  
184 processes underlying the respective conditions of SGA and PTB, both, or a combination, of  
185 which can cause low birthweight.<sup>28</sup> For example, SGA is a marker of intra-uterine growth  
186 restriction related to placental dysfunction,<sup>29</sup> whereas PTB can be caused by a multitude of  
187 factors, including infection and inflammation.<sup>30</sup>

188

189 Given that mothers of preterm children experience elevated levels of distress,<sup>31</sup> are at high  
190 risk of developing postnatal depression,<sup>32</sup> and that preterm children themselves are vulnerable  
191 to psychiatric sequelae,<sup>33</sup> in addition to investigating the association between very early  
192 maternal postnatal depressive symptoms and child behavioural and emotional outcomes, we  
193 further aimed to investigate the interaction between preterm birth and maternal depressive  
194 symptoms on child outcomes. Previous work focusing on the differential susceptibility of  
195 preterm born children to various environmental stimuli, as described above, had not yet  
196 studied maternal depressive symptoms as a proposed exposure. We specifically aimed to  
197 investigate the continuum of maternal depressive symptoms rather than solely focussing on  
198 clinically significant maternal depression, so as to provide more nuanced information about  
199 the importance of subclinical depressive symptoms on child outcomes. We hypothesised that  
200 early postnatal maternal depressive symptoms would be more elevated in mothers of preterm  
201 compared to term infants and that these would impact preterm children's behavioural and  
202 emotional outcomes to a greater degree than their term counterparts.

203

## 204 **Methods**

### 205 **Sample**

206 Participants were enrolled in the Developing Human Connectome Project (DHCP,  
207 <http://www.developingconnectome.org/>), a neuroimaging-focused project, with eligibility  
208 criteria including pregnant women (aged  $\geq 16$  years) with a gestational age of 20–42 weeks,  
209 and newborn infants aged 24–44 weeks; infants enrolled in the DHCP had magnetic  
210 resonance imaging (MRI) at term-equivalent age. Exclusion criteria for the DHCP included:  
211 contraindications to MRI, babies being too unwell to tolerate a scan, and language difficulties  
212 preventing informed consent.<sup>34</sup> Toddlers were invited to the Centre for the Developing Brain,  
213 St Thomas' Hospital, London, for neurodevelopmental assessment at 18 months post-  
214 expected delivery date; appointments were made according to family availability as close as  
215 possible to this time-point. Inclusion criteria for our follow-up study were: mother and baby  
216 attendance for MRI at term-equivalent age; completed toddler neurodevelopmental  
217 assessment. These inclusion criteria were met by 509 toddlers by the date of closure for this  
218 analysis (26/02/2020). Of the 509 toddlers, 51 were one of a twin pregnancy, and three were  
219 one of a triplet pregnancy; the sample contained 22 sibling pairs and one set of triplets. This  
220 study was approved by the UK National Research Ethics Authority (14/LO/1169) and  
221 conducted in accordance with the World Medical Association's Code of Ethics (Declaration  
222 of Helsinki). Written informed consent was given by children's carer(s) at recruitment into  
223 the study.

### 225 **Maternal variables**

226 Maternal age, parity, Body Mass Index (BMI), ethnicity and postcode were collected at  
227 enrolment into the DHCP study. Our sample was ethnically representative of the surrounding  
228 geographical area. Parity was coded as 0, 1, 2, or  $\geq 3$  previous children. Index of Multiple  
229 Deprivation (IMD) rank was computed from the current maternal postcode using the 2019  
230 IMD classification; it combines locality-specific information about income, employment,  
231 education, health, crime, housing and living environment, thus providing a proxy for family  
232 socioeconomic status.<sup>35</sup> Lower IMD rank corresponds to greater social deprivation. Our  
233 sample was generally less deprived than the surrounding geographical areas, as well as the  
234 UK as a whole, reflecting trends observed in other UK longitudinal studies.<sup>36</sup>

236 *Maternal depressive symptoms* were measured using the Edinburgh Postnatal Depression  
237 Scale (EPDS)<sup>37</sup> on the day of infant's MRI at term-equivalent age. Mothers of infants born at

1  
2  
3 238 term were tested in the first few weeks postnatally, whereas mothers of preterm-born infants  
4  
5 239 were tested once they reached term-corrected age. The EPDS is a 10-item screening  
6  
7 240 questionnaire completed by mothers, with higher scores reflecting a higher likelihood of  
8  
9 241 depressive disorders. A score of 13 can be used as a cut-off indicating high-level symptoms,  
10  
11 242 although a cut-off of 11 maximises the sensitivity and specificity of the screening tool for  
12  
13 243 depression.<sup>38</sup> Mothers completed the EPDS independently in a private room in our Centre,  
14  
15 244 with no interaction with the researcher. Participants were informed that the results would be  
16  
17 245 discussed with them, and consented to information being shared with their General  
18  
19 246 Practitioner in the case of high scores. The EPDS questionnaire was scored by a member of  
20  
21 247 the DHCP team.<sup>34</sup>  
22  
23 248

### 249 Child variables

24 250 Infant *clinical characteristics* were gathered from clinical notes where available, or from  
25  
26 251 maternal report, and included: sex, gestational age at birth, birth weight, and pregnancy size  
27  
28 252 (singleton/twin/triplet).  
29  
30 253

31 254 *Behavioural outcomes* were assessed using the Child Behaviour Checklist/1<sup>1/2</sup>-5 (CBCL), a  
32  
33 255 parent-completed 100-item questionnaire, in which the parent rates the child's behaviour over  
34  
35 256 the preceding two months using a 3-point Likert scale ("not true", "somewhat or sometimes  
36  
37 257 true", and "very true or often true"). Responses are categorised into syndrome profiles, and  
38  
39 258 these are subsequently grouped into internalising (emotional reactivity, anxiety/depression,  
40  
41 259 somatic complaints, and withdrawal), externalising (attention problems, aggressive  
42  
43 260 behaviour) and total (internalising, externalising, sleep and other) problem scales. Higher  
44  
45 261 scores indicate increased emotional and behavioural problems. Total scores are classified into  
46  
47 262 a normal range (<83<sup>rd</sup> centile, T <60), borderline range (83<sup>rd</sup>-90<sup>th</sup> centile, T 60-63), and  
48  
49 263 clinical range (>90<sup>th</sup> centile, T ≥64).<sup>39</sup> The CBCL is known to have high reliability, validity  
50  
51 264 and cross-informant agreement for measuring children's emotional and behavioural  
52  
53 265 problems.<sup>39</sup>  
54  
55 266

56 267 We used the Quantitative Checklist for Autism in Toddlers (Q-CHAT) as an additional  
57  
58 268 behavioural screening tool to broaden the exploration of mental health outcomes in toddlers.  
59  
60 269 The Q-CHAT is a parent-completed 25-item questionnaire, in which the child's behaviour is  
270  
271 270 scored on a 5-point (0-4) frequency scale. Higher total scores correspond to a higher  
frequency of behaviours also observed in autism spectrum conditions. The Q-CHAT shows

272 good test-retest reliability, face validity and specificity, yet poor positive predictive value for  
273 autism,<sup>40,41</sup> highlighting that higher Q-CHAT scores may reflect developmental immaturity  
274 rather than autism.<sup>41</sup>

275  
276 *Cognitive assessment* was performed using the Bayley Scales of Infant and Toddler  
277 Development – Third Edition (Bayley-III). The Bayley-III provides scores for a child's  
278 overall cognitive, language and motor development. The cognitive standardised composite  
279 score was used in this study; scores between 70-84 indicate mild cognitive impairment,  
280 scores between 55-69 indicate moderate impairment, and scores lower than 55 indicate severe  
281 impairment<sup>42</sup>. Reliability and validity of the Bayley-III have been shown to be robust,<sup>43</sup>  
282 although some studies report its underestimation of developmental problems.<sup>44</sup>

284 Assessments were carried out by staff experienced in the neurocognitive assessments of  
285 toddlers.

### 287 Analysis

288 Descriptive statistics and one-way ANOVA tests were performed in IBM SPSS Statistics for  
289 Windows v.25. All other analyses were carried out in Stata v.16.

291 Multiple imputation (MI) was carried out to account for missing data in CBCL (11/509,  
292 2.24%), Q-CHAT (9/509, 1.8%), maternal EPDS (73/509, 14.3%), maternal BMI (27/509,  
293 5.3%) and IMD rank (3/509, 0.6%). Variables were imputed simultaneously using the 'mi  
294 impute chained' procedure that performs imputation by chained equations. The imputation  
295 models had the same structural form as the analysis models, and included all variables that  
296 appear in the corresponding analysis models (maternal EPDS, maternal BMI, multiple  
297 pregnancy, parity, IMD rank, gestational age at birth, birthweight, sex, corrected age at  
298 assessment, and Bayley III Cognitive Composite score); in addition, maternal age was also  
299 included in the imputation model because it was found to be a significant predictor of both  
300 the total CBCL raw score and the Q-CHAT score when it was included as the sole  
301 independent variable in linear regression models.

303 Maternal EPDS and CBCL were imputed using Poisson regression; Q-CHAT, maternal BMI,  
304 and the IMD rank were imputed using linear regression. 40 MI datasets were created. To  
305 assess the stability of our MI parameters, we extracted the Monte Carlo error of each

1  
2  
3 306 parameter estimate and examined whether the error for the coefficient was less than 10% of  
4  
5 307 the parameter's standard error estimate. MI estimates were used for the primary analyses and  
6  
7 308 compared to the estimates from complete-case (CC, individuals who had no missing data pre-  
8  
9 309 imputation) analyses. Normal probability plots of residuals from the CC analyses were  
10  
11 310 examined.

12 311  
13 312 The analysis models were multiple linear regressions fitted using the 'mi estimate' procedure,  
14  
15 313 which estimates effects after application of Rubin's rules.<sup>45</sup> To account for the small amount  
16  
17 314 of clustering in our data (twin/triplet siblings), the models' standard errors were obtained  
18  
19 315 using Stata's robust cluster estimator 'vce(cluster *idvar*)'. For continuous variables, Cohen's  
20  
21 316 f-squared effect sizes were calculated using  $f^2 = (R_{AB}^2 - R_A^2)/(1 - R_{AB}^2)$ , where  $R_{AB}^2$  is the R-  
22  
23 317 squared value from a regression model that includes the variable of interest as well as all the  
24  
25 318 covariates used in the model, and  $R_A^2$  is the R-squared value from the regression model that  
26  
27 319 includes only the covariates.<sup>46,47</sup> For binary variables, Cohen's f-squared effect sizes were  
28  
29 320 produced after estimating first the Cohen's d using the formula:  $f^2 = \frac{d}{2k}$ , where k is the  
30  
31 321 number of groups. As a measure of dispersion, Cohen's d used the average root mean-square  
32  
33 322 error over the MI datasets. Adjusted R-squared values after MI were extracted after  
34  
35 323 estimating the model with the user-written 'mibeta' command with the 'fisherz' option,<sup>48</sup>  
36  
37 324 which calculates R-squared measures for linear regression with MI data. The significance of  
38  
39 325 the joint effect of the categorical variable parity was assessed using 'mi test' which performs  
40  
41 326 Wald tests of composite linear hypotheses.

42 327  
43 328 *Primary outcome measures* were children's total CBCL raw score and Q-CHAT score.  
44  
45 329 *Secondary outcome measures* were CBCL internalising and externalising scores. The effect  
46  
47 330 of maternal EPDS score was adjusted for IMD rank, maternal age, maternal BMI, maternal  
48  
49 331 parity, pregnancy size, and the following child's variables: continuous gestational age, birth  
50  
51 332 weight, Bayley-III cognitive composite score, and corrected age at assessment. The  
52  
53 333 interaction between preterm birth and maternal depressive symptoms was explored using a  
54  
55 334 complete case analysis in both CBCL and Q-CHAT models, using a dichotomised measure of  
56  
57 335 gestational age. EPDS, CBCL and Q-CHAT scores were compared between term ( $\geq 37$  weeks  
58  
59 336 gestation) and preterm infants ( $< 37$  weeks gestation) using the complete case dataset. Our  
60  
337 regressions were thus run twice: with and without the interaction term.  
338

1  
2  
3 339  
4  
5 340 As all mothers had their EPDS score measured near term (or term-corrected in the case of  
6  
7 341 mothers of preterm infants), we further investigated the association between time elapsing  
8  
9 342 between baby's birth and mother's EPDS assessment and EPDS score, in order to avoid  
10  
11 343 erroneously identifying 'baby blues' in mothers of term-born infants versus postnatal  
12  
13 344 depression in mothers of preterm infants. This post-hoc analysis was performed using  
14  
15 345 Poisson regression.

16 346

### 17 347 Patient and Public Involvement

18  
19 348 The current study was developed in consultation with the Weston Programme for Family  
20  
21 349 Centered Research, which involves parents to define what research is valuable to them, and to  
22  
23 350 allow them to lead it with support from the scientists in the Centre for the Developing Brain.

24 351

### 25 352 Results

#### 26 353 Descriptive statistics

27  
28  
29 354 Our sample of 509 toddlers were followed up at a median corrected age of 18.4 months  
30  
31 355 (range 17.3 – 24.3 months). 51 (10.0%) of these were twins, and 3 (0.59%) were triplets. Of  
32  
33 356 the 509, 21 (4.13%) mothers scored above a clinical cut-off ( $\geq 13$ ) on the EPDS;(26) the  
34  
35 357 distribution of maternal EPDS scores is shown graphically in Supplementary Figure 1.  
36  
37 358 Demographic data are shown in Table 1. Complete data were available for 400 (78.6%)  
38  
39 359 participants. Missing data were imputed and thus all 509 subjects were included in the  
40  
41 360 primary and secondary analyses. One participant was excluded from the cognition analysis  
42  
43 361 after examining the quintiles of the residuals against the theoretical quintiles of a normal  
44  
45 362 distribution. The mean CBCL T score was 46.9 (SD 9.5) (Table 1); using CBCL-specified  
46  
47 363 cut-offs,<sup>39</sup> 449 (90.2%) of participants had a CBCL score in the normal range, 30 (6.0%)  
48  
49 364 were borderline, and 19 (3.8%) scored in the clinical range. The mean Q-CHAT score was  
50  
51 365 30.5 (SD 9.3) (Table 1). The mean Bayley III Cognitive Composite score in our sample was  
52  
53 366 100 (SD 11.4) (Table 1), which corresponds to the standardised test mean;<sup>42</sup> 480 (94.3%) of  
54  
55 367 participants had a normal cognitive score, 24 (4.7%) had mild impairment, 5 (1%) had  
56  
57 368 moderate impairment, and nil had severe impairment. This distribution is not dissimilar from  
58  
59 369 that of the normative sample.<sup>42</sup>

60 370

#### 61 371 Association between maternal EPDS score and toddler CBCL and Q-CHAT scores

1  
2  
3 372 Predictors of children's CBCL and Q-CHAT scores after multiple imputation are shown in  
4 373 Table 2. Higher maternal EPDS score was associated with children's higher CBCL Total  
5 374 score (B=0.93, 95% CI 0.43-1.44,  $p<0.001$ ,  $f^2=0.05$ ) and Q-CHAT score (B=0.27, 95% CI  
6 375 0.03-0.52,  $p=.031$ ,  $f^2=0.01$ ) (Table 2). These associations are presented graphically in Figure  
7 376 1 and Figure 2, respectively. Boys had higher CBCL and Q-CHAT scores than girls. Higher  
8 377 Q-CHAT scores were associated with lower IMD rank (i.e., greater socio-economic  
9 378 deprivation) and lower Bayley-III cognitive composite scores. Parity was not a significant  
10 379 predictor of outcome in any of the models (Table 2).

380

11 381 Maternal EPDS score did not disproportionately affect preterm children with respect to  
12 382 CBCL or Q-CHAT scores (Table 3).

383

13 384 Association between maternal EPDS score and toddler CBCL internalising and externalising  
14 385 scores

15 386 Higher maternal EPDS score was associated with both internalising (B=0.22, 95% CI 0.08-  
16 387 0.36,  $p<0.01$ ,  $f^2=0.03$ ) and externalising (B=0.40, 95% CI 0.20-0.61,  $p<0.001$ ,  $f^2=0.05$ )  
17 388 symptoms in children (Supplementary Table 1 and 2, respectively). Comparison of the  
18 389 imputed model analyses to the complete-case analyses showed that results were consistent for  
19 390 the CBCL model (Supplementary Table 3). Comparison for the Q-CHAT model showed that  
20 391 maternal EPDS was a significant predictor in the imputed model, but not in the complete-case  
21 392 analysis (Supplementary Table 3).

393

22 394 Effect of time-lag between baby's birth and mother's EPDS assessment and EPDS score

23 395 Mothers who gave birth prematurely (<37 weeks gestation) had their EPDS score assessed on  
24 396 average 7.7 weeks later post-delivery than mothers who gave birth at term (preterm  
25 397 participants M=8.9 (SD 4.8), term participants M=1.2 (SD 1.3);  $t(99.4)=15.5$ ,  $p<.001$ ). The  
26 398 time-lag between birth and EPDS assessment did not predict maternal EPDS score, and there  
27 399 was no evidence of a significant interaction between gestation and birth-to-assessment time-  
28 400 lag (Supplementary Table 4 and 5, respectively).

401

29 402 **Discussion**

30 403 **Principal findings**

31 404 Our results showed that more maternal self-reported depressive symptoms shortly after birth  
32 405 were associated with greater parent-reported toddlers' behavioural problems. Given that



1  
2  
3 406 fewer than 5% of the mothers in our cohort had EPDS scores above a clinical threshold,<sup>37</sup> our  
4 407 findings indicate that even subclinical depressive symptoms – i.e. not only diagnostic  
5 408 postnatal depression – adversely impact children’s behavioural outcomes. In addition, our  
6 409 cohort was typically developing with few CBCL scores reaching a concerning threshold; our  
7 410 results could be interpreted within the conceptual framework of mental illness lying on a  
8 411 continuum with typical behavioural traits.<sup>49</sup> Our findings further showed that preterm birth  
9 412 did not influence the association between self-reported maternal depressive symptoms and  
10 413 parent-reported infants’ behavioural outcomes in toddlerhood. This indicates that in this  
11 414 context preterm birth may not be regarded as a vulnerability or plasticity factor. Interestingly,  
12 415 mothers of preterm infants did not report more depressive symptoms compared to mothers of  
13 416 term infants in this study.  
14  
15  
16  
17  
18  
19  
20  
21  
22  
23

417

### 418 **Comparison to prior literature**

419 Our results with respect to internalising and externalising symptoms are in line with previous  
420 studies, including large population cohort studies, that showed an association between  
421 postnatal maternal depression and young children’s emotional and behavioural problems.<sup>11</sup>  
422 Another previous study in 18-month old toddlers found that maternal depression was  
423 associated with internalising and dysregulated behaviour, but not externalising symptoms.<sup>50</sup>  
424 This difference between our and Conroy et al.’s findings may have arisen from their  
425 exclusion of infants born <36 weeks and their use of a clinical diagnosis of depression for  
426 mothers, rather than the continuous self-reported approach we employed. Interestingly, our  
427 finding that even subclinical depressive symptoms may adversely impact parent-reported  
428 child behavioural outcomes is in line with recent data showing that low- as well as high-level  
429 depressive symptoms are associated with internalising and externalising symptoms in  
430 children aged 3 years.<sup>51</sup>  
431

432

433 The results showing an association between maternal postnatal depressive symptoms and the  
434 Q-CHAT are less robust and need to be interpreted with caution. Firstly, these results must be  
435 viewed in the context of the Q-CHAT having a low positive predictive value for autism, with  
436 the measure perhaps being more reflective of developmental immaturity.<sup>41</sup> Although some  
437 prior studies have shown an association between antenatal maternal depression and  
438 offspring’s ASD,<sup>10,52</sup> and postnatal depression has been suggested as a potential focus of  
439 cross-domain studies of ASD,<sup>53</sup> there is no clear aetiological role of maternal postnatal  
depression in the development of ASD *per se*. Also, given that mothers with ASD are more

1  
2  
3 440 likely to suffer from perinatal depression than mothers without ASD,<sup>54</sup> and ASD is highly  
4  
5 441 heritable,<sup>55</sup> maternal depression may actually be a confounding rather than causative factor in  
6  
7 442 our observed results. Overall, therefore, our findings with respect to the Q-CHAT do not  
8  
9 443 provide support for a role of maternal depression in the aetiology of autism traits, but rather  
10  
11 444 suggest that maternal depression can influence toddler behaviour.  
12

13  
14 446 The finding that preterm infants were not disproportionately affected by maternal depressive  
15  
16 447 symptoms supports Hadfield et al.'s findings that maternal distress at 9 months did not  
17  
18 448 differentially impact very preterm (<34 weeks) or late preterm (34-36<sup>+6</sup> weeks) infants with  
19  
20 449 respect to socioemotional outcomes, although paternal distress did have an impact on very  
21  
22 450 preterm infants' outcomes.<sup>24</sup> However, our results differ from Gueron-Sela et al.'s finding  
23  
24 451 that very preterm (28-33 weeks) 12 month old infants' social outcomes were more influenced  
25  
26 452 by maternal emotional distress at 6 months than term infants' outcomes.<sup>23</sup> The inconsistent  
27  
28 453 findings may be due to methodological differences: for instance, our infant assessment being  
29  
30 454 conducted at 18 months corrected age when social competency is more developed, our  
31  
32 455 assessment of maternal depressive symptoms being in the very early postnatal period, or our  
33  
34 456 use of the CBCL and Q-CHAT tools as markers of toddler behaviour. Importantly, the lack of  
35  
36 457 support for a diathesis-stress or differential susceptibility model of maternal mental state on  
37  
38 458 preterm infants in our study must be viewed in the context of our results also showing no  
39  
40 459 difference in CBCL and Q-CHAT scores between term and preterm infants. This is in  
41  
42 460 contrast to the existing literature that preterm infants are more likely than term infants to  
43  
44 461 develop behavioural problems, such as ADHD, in childhood and adolescence.<sup>20,33</sup> It is  
45  
46 462 possible that the phenotypes of neurodevelopmental and neuropsychiatric disorders assessed  
47  
48 463 with the chosen behavioural measures may not be sufficiently expressed at 18 months  
49  
50 464 corrected age.<sup>56</sup> In addition, as briefly discussed above, much of the existing literature  
51  
52 465 emphasises the risk of extreme (<28 weeks) or very preterm (28-33 weeks) birth on later  
53  
54 466 behavioural outcomes,<sup>20,33</sup> whereas only 3.5% and 5.5% of our participants fell within the  
55  
56 467 extreme and very preterm group, respectively, and we thus may not have the power to show  
57  
58 468 any subtle effects.  
59

### 59 469 60 **Strengths & limitations of the study**

61 470 The strengths of this study lie primarily in its large sample and prospective data collection.  
62  
63 471 Moreover, the use of multiple imputation methodology has facilitated retention of a complete  
64  
65 472

1  
2  
3 473 dataset, thus minimising non-response bias and increasing parameter precision. A strength in  
4  
5 474 comparison to prior population cohort studies is that we assessed very early maternal  
6  
7 475 depressive symptoms, and our sample is perhaps more representative of today's society –  
8  
9 476 with increasing maternal age – than large cohort studies conducted in the 1990s-2000s. Given  
10  
11 477 the complex interplay of biological and environmental factors in the aetiology of behavioural  
12  
13 478 disorders, the inclusion of a substantive proportion of preterm infants in our cohort also offers  
14  
15 479 an important insight into the role of preterm birth in behavioural outcomes; moreover, our  
16  
17 480 results represent the full gestational spectrum, rather than discrete gestational categories. In  
18  
19 481 addition, using maternal depressive symptoms as a continuous, rather than dichotomous,  
20  
21 482 variable allows a more nuanced understanding of the role maternal postnatal depressive  
22  
23 483 symptoms may play in influencing children's outcomes.

484

24 485 There are several limitations to this study that necessitate our findings to be considered with  
25  
26 486 caution. Firstly, differences in birth-to-EPDS-assessment time-lags are a potential  
27  
28 487 confounder, given the time-sensitive nature of early-onset temporary baby blues and later-  
29  
30 488 onset pathological postnatal depression. Mothers of infants born at term were assessed early  
31  
32 489 post-delivery, within the period one would anticipate baby blues to present, whereas mothers  
33  
34 490 of preterm participants were on average assessed later, when postnatal depression  
35  
36 491 predominates.<sup>1,57</sup> Although our post-hoc analyses showed that the time elapsed from birth to  
37  
38 492 EPDS assessment was not associated with maternal EPDS score, providing reassurance that  
39  
40 493 our assessments of mothers of term-born infants were not inflated by the common temporary  
41  
42 494 symptoms of baby blues, it is possible that we did not capture the full extent of later-onset  
43  
44 495 depressive symptoms in mothers of term-born infants. This may explain why maternal EPDS  
45  
46 496 scores did not differ between preterm and term groups in our complete dataset analysis,  
47  
48 497 contrary to the current literature,<sup>31</sup> as well as why our rate of postpartum depression, using an  
49  
50 498 EPDS cut-off of 13, was low (4.1%) compared to the previously documented UK community  
51  
52 499 prevalence rate of 8.9% at eight weeks postpartum.<sup>58</sup> Our results must therefore be  
53  
54 500 interpreted with some caution.

501

53 502 Secondly, although statistical techniques were used to impute missing data and mitigate this  
54  
55 503 problem, 14.3% of maternal EPDS scores were missing. This rate of missingness may relate  
56  
57 504 to some mothers being reluctant to complete a questionnaire at the time their child is having  
58  
59 505 an MRI, or due to simultaneous childcare duties. Thirdly, a number of important confounders  
60  
506 that are likely to affect children's behavioural outcomes were not assessed in this study,

1  
2  
3 507 including genetic risk for psychiatric disorders,<sup>59</sup> parental psychiatric co-morbidities,<sup>50</sup>  
4 508 chronicity of postnatal depressive symptoms,<sup>51</sup> antenatal maternal depression, paternal  
5 509 depression and subsequent parent-infant attachment, and inter-parental conflict.<sup>11</sup> Thus, we  
6  
7  
8 510 are unable to conclude whether our observed associations between early postnatal maternal  
9  
10 511 depressive symptoms and children's behavioural outcomes are moderated or mediated by  
11  
12 512 other parental and/or psychiatric factors.

13  
14 513

15 514 Fourthly, whilst our study included a reasonable proportion of preterm infants (97/509, 19%),  
16  
17 515 our sample was not random, as preterm children were selectively recruited for the DHCP;  
18  
19 516 indeed, preterm infants are over-represented in our sample when compared to the UK  
20  
21 517 population incidence (7.3%),<sup>60</sup> which may limit the study's generalisability to the general  
22  
23 518 population. This over-representation of preterm infants may explain why our mean maternal  
24  
25 519 age is higher than the national mean age of 30.7,<sup>61</sup> given that increasing maternal age is  
26  
27 520 associated with increased risk of adverse pregnancy outcomes.<sup>62</sup> Our observed large maternal  
28  
29 521 age range in itself also poses a limitation on the generalisability of our findings to the general  
30  
31 522 population, and further research would be necessary to identify a possible moderation effect  
32  
33 523 of high maternal age on both EPDS scores and child behavioural outcomes. Furthermore,  
34  
35 524 although a 19% prevalence of preterm birth is high for a community sample, the proportion  
36  
37 525 of very and extreme preterm infants in our sample is small, and this may not have provided  
38  
39 526 sufficient power to detect any differential susceptibility effect of preterm birth on outcomes.

40  
41 527

42 528 Sixthly, the effect sizes of the association between maternal EPDS score and behavioural  
43  
44 529 problems were small; this raises questions regarding the clinical significance of our findings  
45  
46 530 and potentially explains some of the inconsistency between this and previous studies. Even  
47  
48 531 within our analyses, the association between maternal depressive symptoms and Q-CHAT  
49  
50 532 scores was not observed in our complete case analysis, thus calling into question the validity  
51  
52 533 of this result. It is also important to highlight again the poor positive predictive value of the  
53  
54 534 Q-CHAT for autism;<sup>41</sup> higher Q-CHAT scores do not imply a diagnosis of ASD, and this  
55  
56 535 distinction may also explain the contrast to previous studies.

57  
58 536

59 537 Finally, it is well documented that maternal depression influences reporting of Q-CHAT <sup>63</sup>  
60  
538 and CBCL scores.<sup>64</sup> Our study used maternal report of maternal depressive symptoms, and  
539  
540 539 our outcome measures were parent-completed questionnaires; despite the CBCL showing

540 good cross-informant agreement,<sup>39</sup> it is thus possible that reporting bias with common  
541 method variance could have skewed our results.

542

### 543 **Implications of our findings**

544 Of greatest importance to clinicians and policymakers is our finding that even *subclinical*  
545 self-reported maternal depressive symptoms are associated with parent-reported behavioural  
546 outcomes of offspring. This has significant implications for the risk-stratification of women  
547 and their babies in the postnatal period, during which contact with medical professionals is  
548 already established. Identifying high risk families and providing appropriate supportive  
549 measures at the early postnatal stage may help to prevent future psychiatric morbidity.

550

### 551 **Future research**

552 Further follow-up of large cohorts of preterm and term infants, to an age when behavioural  
553 phenotypes may become more pronounced, is needed to investigate whether the long-term  
554 developmental trajectories of term and ex-preterm infants are differentially susceptible to  
555 changes of postnatal maternal mental health. Future research should consider both maternal  
556 and paternal mental health, as well as socioeconomic and environmental factors on child  
557 outcomes. Such follow-up should use independent, objective assessments of child  
558 behavioural outcomes in order to avoid the common method variance inherent to parent-  
559 reported measures. Finally, it is crucial for future research to elucidate the interplay of  
560 biochemical and neurodevelopmental changes that may mediate and confound the translation  
561 of environmental exposures into distal behavioural phenotypes.

562

### 563 **Conclusion**

564 This prospective longitudinal cohort study found no evidence to support the concept of  
565 preterm birth as a vulnerability or plasticity factor with respect to the effect of maternal  
566 depressive symptoms on behavioural development. However, we showed that early  
567 subclinical maternal postnatal depressive symptoms were associated with behavioural  
568 problems in children on parent-reported measures. This adds to the increasing body of  
569 literature indicating the role of subclinical and early postnatal depressive symptoms in the  
570 aetiology of childhood behavioural disorders. These findings are of great relevance to child  
571 and public health, and further research may strengthen its implications for developing  
572 strategies to facilitate effective screening and support for women and children, enabling all to  
573 reach their full potential.

1  
2  
3 574  
4  
5 575

6 576 **Acknowledgements & contributions**

8 577 We thank all DHCP investigators for their contribution to the study. We thank Dr Oliver  
9  
10 578 Gale-Grant MRes (Centre for the Developing Brain, King's College London; Department of  
11  
12 579 Forensic & Neurodevelopmental Sciences, King's College London) for providing the IMD  
13  
14 580 rank data. We are very grateful to the families who generously took part in this research.

15 581

17 582 **Conceptualization:** SC, ADE, CN; **Methodology:** IK, GV, SC, AP, ADE, CN;

18  
19 583 **Investigation:** SF, AC; **Data curation:** IK, AL; **Formal analysis:** IK, GV, AP, CN;

20 584 **Writing – original draft preparation:** IK; **Writing – Review & Editing:** GV, AL, SF, AC,

22 585 SC, AP, ADE, CN; **Visualisation:** IK, GV; **Funding acquisition:** SC, ADE; **Supervision:**

24 586 AP, ADE, CN.

25 587

28 588 **References**

- 30 589 1. Woody CA, Ferrari AJ, Siskind DJ, Whiteford HA, Harris MG. A systematic review and meta-  
31 590 regression of the prevalence and incidence of perinatal depression. *J Affect Disord.*  
32 591 2017;219:86-92. doi:10.1016/j.jad.2017.05.003
- 34 592 2. Rezaie-Keikhaie K, Arbabshastan ME, Rafiemanesh H, Amirshahi M, Ostadkelayeh SM,  
35 593 Arbabisarjou A. Systematic Review and Meta-Analysis of the Prevalence of the Maternity Blues  
36 594 in the Postpartum Period. *J Obstet Gynecol Neonatal Nurs.* 2020;49(2):127-136.  
37 595 doi:10.1016/j.jogn.2020.01.001
- 39 596 3. Beck CT. Predictors of postpartum depression: an update. *Nurs Res.* 2001;50(5):275-285.
- 41 597 4. de Paula Eduardo JAF, de Rezende MG, Menezes PR, Del-Ben CM. Preterm birth as a risk  
42 598 factor for postpartum depression: A systematic review and meta-analysis. *J Affect Disord.*  
43 599 2019;259:392-403. doi:10.1016/j.jad.2019.08.069
- 45 600 5. Blom EA, Jansen PW, Verhulst FC, et al. Perinatal complications increase the risk of  
46 601 postpartum depression. The Generation R Study. *BJOG Int J Obstet Gynaecol.*  
47 602 2010;117(11):1390-1398. doi:10.1111/j.1471-0528.2010.02660.x
- 49 603 6. Beck CT. Postpartum depression: a metasynthesis. *Qual Health Res.* 2002;12(4):453-472.  
50 604 doi:10.1177/104973202129120016
- 52 605 7. Grace SL, Evindar A, Stewart DE. The effect of postpartum depression on child cognitive  
53 606 development and behavior: a review and critical analysis of the literature. *Arch Womens Ment*  
54 607 *Health.* 2003;6(4):263-274. doi:10.1007/s00737-003-0024-6
- 56 608 8. Lebel C, Walton M, Letourneau N, Giesbrecht GF, Kaplan BJ, Dewey D. Prepartum and  
57 609 postpartum maternal depressive symptoms are related to children's brain structure in preschool.  
58 610 *Biol Psychiatry.* 2016;80(11):859-868. doi:10.1016/j.biopsych.2015.12.004

- 1  
2  
3 611 9. Goodman SH, Rouse MH, Connell AM, Broth MR, Hall CM, Heyward D. Maternal depression  
4 612 and child psychopathology: a meta-analytic review. *Clin Child Fam Psychol Rev.* 2011;14(1):1-  
5 613 27. doi:10.1007/s10567-010-0080-1  
6  
7 614 10. Hagberg KW, Robijn AL, Jick S. Maternal depression and antidepressant use during pregnancy  
8 615 and the risk of autism spectrum disorder in offspring. *Clin Epidemiol.* 2018;10:1599-1612.  
9 616 doi:10.2147/CLEP.S180618  
10  
11 617 11. Stein A, Pearson RM, Goodman SH, et al. Effects of perinatal mental disorders on the fetus and  
12 618 child. *The Lancet.* 2014;384(9956):1800-1819. doi:10.1016/S0140-6736(14)61277-0  
13  
14 619 12. Van Batenburg-Eddes T, Brion MJ, Henrichs J, et al. Parental depressive and anxiety symptoms  
15 620 during pregnancy and attention problems in children: a cross-cohort consistency study. *J Child*  
16 621 *Psychol Psychiatry.* 2013;54(5):591-600. doi:10.1111/jcpp.12023  
17  
18 622 13. Barker ED, Jaffee SR, Uher R, Maughan B. The contribution of prenatal and postnatal maternal  
19 623 anxiety and depression to child maladjustment. *Depress Anxiety.* 2011;28(8):696-702.  
20 624 doi:10.1002/da.20856  
21  
22 625 14. Pearson RM, Evans J, Kounali D, et al. Maternal depression during pregnancy and the postnatal  
23 626 period: risks and possible mechanisms for offspring depression at 18 years. *JAMA Psychiatry.*  
24 627 2013;70(12):1312-1319. doi:10.1001/jamapsychiatry.2013.2163  
25  
26 628 15. Kleine I, Falconer S, Roth S, et al. Early postnatal maternal trait anxiety is associated with the  
27 629 behavioural outcomes of children born preterm <33 weeks. *J Psychiatr Res.* 2020;131:160-168.  
28 630 doi:10.1016/j.jpsychires.2020.09.010  
29  
30 631 16. Feder A, Nestler EJ, Charney DS. Psychobiology and molecular genetics of resilience. *Nat Rev*  
31 632 *Neurosci.* 2009;10(6):446-457. doi:10.1038/nrn2649  
32  
33 633 17. World Health Organization. Preterm birth. Published February 19, 2018. Accessed May 18,  
34 634 2022. <https://www.who.int/news-room/fact-sheets/detail/preterm-birth>  
35  
36 635 18. Dimitrova R, Pietsch M, Christiaens D, et al. Heterogeneity in brain microstructural  
37 636 development following preterm birth. *Cereb Cortex.* 2020;30(9):4800-4810.  
38 637 doi:10.1093/cercor/bhaa069  
39  
40 638 19. Fitzallen GC, Sagar YK, Taylor HG, Bora S. Anxiety and depressive disorders in children born  
41 639 preterm: a meta-analysis. *J Dev Behav Pediatr JDBP.* 2021;42(2):154-162.  
42 640 doi:10.1097/DBP.0000000000000898  
43  
44 641 20. Allotey J, Zamora J, Cheong-See F, et al. Cognitive, motor, behavioural and academic  
45 642 performances of children born preterm: a meta-analysis and systematic review involving 64 061  
46 643 children. *BJOG Int J Obstet Gynaecol.* 2018;125(1):16-25. doi:10.1111/1471-0528.14832  
47  
48 644 21. Jaekel J, Pluess M, Belsky J, Wolke D. Effects of maternal sensitivity on low birth weight  
49 645 children's academic achievement: a test of differential susceptibility versus diathesis stress. *J*  
50 646 *Child Psychol Psychiatry.* 2015;56(6):693-701. doi:10.1111/jcpp.12331  
51  
52 647 22. Belsky J, Bakermans-Kranenburg MJ, van IJzendoorn MH. For better and for worse: differential  
53 648 susceptibility to environmental influences. *Curr Dir Psychol Sci.* 2007;16(6):300-304.  
54 649 doi:10.1111/j.1467-8721.2007.00525.x  
55  
56  
57  
58  
59  
60

- 1  
2  
3 650 23. Gueron-Sela N, Atzaba-Poria N, Meiri G, Marks K. The caregiving environment and  
4 651 developmental outcomes of preterm infants: diathesis stress or differential susceptibility effects?  
5 652 *Child Dev.* 2015;86(4):1014-1030. doi:<https://doi.org/10.1111/cdev.12359>
- 7 653 24. Hadfield K, O'Brien F, Gerow A. Is level of prematurity a risk/plasticity factor at three years of  
8 654 age? *Infant Behav Dev.* 2017;47:27-39. doi:10.1016/j.infbeh.2017.03.003
- 10 655 25. Belsky J, Pluess M. Beyond diathesis stress: differential susceptibility to environmental  
11 656 influences. *Psychol Bull.* 2009;135(6):885-908. doi:10.1037/a0017376
- 13 657 26. Pluess M, Belsky J. Prenatal programming of postnatal plasticity? *Dev Psychopathol.*  
14 658 2011;23(1):29-38. doi:10.1017/S0954579410000623
- 16 659 27. DeMaster D, Bick J, Johnson U, Montroy JJ, Landry S, Duncan AF. Nurturing the preterm  
17 660 infant brain: leveraging neuroplasticity to improve neurobehavioral outcomes. *Pediatr Res.*  
18 661 2019;85(2):166-175. doi:10.1038/s41390-018-0203-9
- 20 662 28. World Health Organization (WHO). Global nutrition targets 2025: low birth weight policy brief.  
21 663 Published online 2014.
- 23 664 29. Kramer MS. Determinants of low birth weight: methodological assessment and meta-analysis.  
24 665 *Bull World Health Organ.* 1987;65(5):663-737.
- 26 666 30. Goldenberg RL, Culhane JF, Iams JD, Romero R. Epidemiology and causes of preterm birth.  
27 667 *Lancet Lond Engl.* 2008;371(9606):75-84. doi:10.1016/S0140-6736(08)60074-4
- 29 668 31. Carson C, Redshaw M, Gray R, Quigley MA. Risk of psychological distress in parents of  
30 669 preterm children in the first year: evidence from the UK Millennium Cohort Study. *BMJ Open.*  
31 670 2015;5(12):e007942. doi:10.1136/bmjopen-2015-007942
- 33 671 32. Vigod SN, Villegas L, Dennis CL, Ross LE. Prevalence and risk factors for postpartum  
34 672 depression among women with preterm and low-birth-weight infants: a systematic review.  
35 673 *BJOG Int J Obstet Gynaecol.* 2010;117(5):540-550. doi:10.1111/j.1471-0528.2009.02493.x
- 37 674 33. Johnson S, Wolke D. Behavioural outcomes and psychopathology during adolescence. *Early*  
38 675 *Hum Dev.* 2013;89(4):199-207. doi:10.1016/j.earlhumdev.2013.01.014
- 40 676 34. Lautarescu A, Victor S, Lau-Zhu A, Counsell SJ, Edwards AD, Craig MC. The factor structure  
41 677 of the Edinburgh Postnatal Depression Scale among perinatal high-risk and community samples  
42 678 in London. *Arch Womens Ment Health.* 2022;25(1):157-169. doi:10.1007/s00737-021-01153-0
- 44 679 35. Ministry of Housing, Communities & Local Government. The English indices of deprivation  
45 680 2019. Published online 2019.  
46 681 [https://assets.publishing.service.gov.uk/government/uploads/system/uploads/attachment\\_data/file/835115/IOD2019\\_Statistical\\_Release.pdf](https://assets.publishing.service.gov.uk/government/uploads/system/uploads/attachment_data/file/835115/IOD2019_Statistical_Release.pdf)  
47 682
- 49 683 36. Boyd A, Golding J, Macleod J, et al. Cohort Profile: The 'Children of the 90s'—the index  
50 684 offspring of the Avon Longitudinal Study of Parents and Children. *Int J Epidemiol.*  
51 685 2013;42(1):111-127. doi:10.1093/ije/dys064
- 53 686 37. Cox JL, Holden JM, Sagovsky R. Detection of postnatal depression: development of the 10-item  
54 687 Edinburgh Postnatal Depression Scale. *Br J Psychiatry.* 1987;150(6):782-786.  
55 688 doi:10.1192/bjp.150.6.782



- 1  
2  
3 689 38. Levis B, Negeri Z, Sun Y, Benedetti A, Thombs BD. Accuracy of the Edinburgh Postnatal  
4 690 Depression Scale (EPDS) for screening to detect major depression among pregnant and  
5 691 postpartum women: systematic review and meta-analysis of individual participant data. *BMJ*.  
6 692 2020;371. doi:10.1136/bmj.m4022
- 8 693 39. Achenbach TM, Rescorla LA. *Manual for the ASEBA Preschool Forms & Profiles.*; 2000.
- 10 694 40. Allison C, Baron-Cohen S, Wheelwright S, et al. The Q-CHAT (Quantitative Checklist for  
11 695 Autism in Toddlers): a normally distributed quantitative measure of autistic traits at 18-24  
12 696 months of age: preliminary report. *J Autism Dev Disord*. 2008;38(8):1414-1425.  
13 697 doi:10.1007/s10803-007-0509-7
- 15 698 41. Allison C, Matthews FE, Ruta L, et al. Quantitative Checklist for Autism in Toddlers (Q-  
16 699 CHAT). A population screening study with follow-up: the case for multiple time-point  
17 700 screening for autism. *BMJ Paediatr Open*. 2021;5(1):e000700. doi:10.1136/bmjpo-2020-000700
- 19 701 42. Bayley N. *Bayley Scales of Infant and Toddler Development - Third Edition*. 3rd ed. Harcourt  
20 702 Assessment; 2006.
- 22 703 43. Albers CA, Grieve AJ. Review of Bayley scales of infant and toddler development-third edition.  
23 704 *J Psychoeduc Assess*. 2007;25(2):180-190. doi:10.1177/0734282906297199
- 25 705 44. Anderson PJ, De Luca CR, Hutchinson E, Roberts G, Doyle LW, the Victorian Infant  
26 706 Collaborative Group. Underestimation of developmental delay by the new Bayley-III scale.  
27 707 *Arch Pediatr Adolesc Med*. 2010;164(4):352-356. doi:10.1001/archpediatrics.2010.20
- 29 708 45. Rubin DB. Inference and missing data. *Biometrika*. 1976;63(3):581-592. doi:10.2307/2335739
- 31 709 46. Cohen J. *Statistical Power Analysis for the Behavioral Sciences*. 2nd ed. L. Erlbaum Associates;  
32 710 1988.
- 34 711 47. Selya AS, Rose JS, Dierker LC, Hedeker D, Mermelstein RJ. A practical guide to calculating  
35 712 Cohen's  $f^2$ , a measure of local effect size, from PROC MIXED. *Front Psychol*. 2012;3.  
36 713 doi:10.3389/fpsyg.2012.00111
- 38 714 48. Harel O. The estimation of  $R^2$  and adjusted  $R^2$  in incomplete data sets using multiple  
39 715 imputation. *J Appl Stat*. 2009;36(10):1109-1118. doi:10.1080/02664760802553000
- 41 716 49. Plomin R, Haworth CMA, Davis OSP. Common disorders are quantitative traits. *Nat Rev Genet*.  
42 717 2009;10(12):872-878. doi:10.1038/nrg2670
- 44 718 50. Conroy S, Pariante CM, Marks MN, et al. Maternal psychopathology and infant development at  
45 719 18 months: the impact of maternal personality disorder and depression. *J Am Acad Child  
46 720 Adolesc Psychiatry*. 2012;51(1):51-61. doi:10.1016/j.jaac.2011.10.007
- 48 721 51. Kingston D, Kehler H, Austin MP, et al. Trajectories of maternal depressive symptoms during  
49 722 pregnancy and the first 12 months postpartum and child externalizing and internalizing behavior  
50 723 at three years. *PLoS One*. 2018;13(4):e0195365. doi:10.1371/journal.pone.0195365
- 52 724 52. Wiggins LD, Rubenstein E, Daniels J, et al. A phenotype of childhood autism is associated with  
53 725 preexisting maternal anxiety and depression. *J Abnorm Child Psychol*. 2019;47(4):731-740.  
54 726 doi:10.1007/s10802-018-0469-8

- 1  
2  
3 727 53. Babb JA, Deligiannidis KM, Murgatroyd CA, Nephew BC. Peripartum depression and anxiety  
4 728 as an integrative cross-domain target for psychiatric preventative measures. *Behav Brain Res.*  
5 729 2015;0:32-44. doi:10.1016/j.bbr.2014.03.039  
6  
7 730 54. Pohl AL, Crockford SK, Blakemore M, Allison C, Baron-Cohen S. A comparative study of  
8 731 autistic and non-autistic women's experience of motherhood. *Mol Autism.* 2020;11(1):3.  
9 732 doi:10.1186/s13229-019-0304-2  
10  
11 733 55. Colvert E, Tick B, McEwen F, et al. Heritability of autism spectrum disorder in a UK  
12 734 population-based twin sample. *JAMA Psychiatry.* 2015;72(5):415-423.  
13 735 doi:10.1001/jamapsychiatry.2014.3028  
14  
15 736 56. Egger HL, Emde RN. Developmentally sensitive diagnostic criteria for mental health disorders  
16 737 in early childhood: the diagnostic and statistical manual of mental disorders-IV, the research  
17 738 diagnostic criteria-preschool age, and the diagnostic classification of mental health and  
18 739 developmental disorders of infancy and early childhood-revised. *Am Psychol.* 2011;66(2):95-  
20 740 106. doi:10.1037/a0021026  
21  
22 741 57. Henshaw C. Mood disturbance in the early puerperium: a review. *Arch Women's Ment Health.*  
23 742 2003;6(2):s33-s42. doi:10.1007/s00737-003-0004-x  
24  
25 743 58. Heron J, O'Connor TG, Evans J, Golding J, Glover V. The course of anxiety and depression  
26 744 through pregnancy and the postpartum in a community sample. *J Affect Disord.* 2004;80(1):65-  
27 745 73. doi:10.1016/j.jad.2003.08.004  
28  
29 746 59. Biel MG. Parental psychiatric symptoms and children's outcomes: toward understanding and  
30 747 responding to intergenerational risk in child psychiatry. *J Am Acad Child Adolesc Psychiatry.*  
31 748 2018;57(9):632-633. doi:10.1016/j.jaac.2018.06.010  
32  
33 749 60. National Institute for Health and Care Excellence. Preterm labour and birth (NICE guideline  
34 750 25). Published online November 2015. Accessed January 27, 2019.  
35 751 <https://www.nice.org.uk/guidance/ng25>  
36  
37 752 61. Office for National Statistics. Birth characteristics in England and Wales: 2020. Published  
38 753 January 13, 2022. Accessed February 5, 2022.  
39 754 [https://www.ons.gov.uk/peoplepopulationandcommunity/birthsdeathsandmarriages/livebirths/bu](https://www.ons.gov.uk/peoplepopulationandcommunity/birthsdeathsandmarriages/livebirths/bulletins/birthcharacteristicsinenglandandwales/2020#birth-characteristics)  
40 755 [lletins/birthcharacteristicsinenglandandwales/2020#birth-characteristics](https://www.ons.gov.uk/peoplepopulationandcommunity/birthsdeathsandmarriages/livebirths/bulletins/birthcharacteristicsinenglandandwales/2020#birth-characteristics)  
41  
42 756 62. Londero AP, Rossetti E, Pittini C, Cagnacci A, Driul L. Maternal age and the risk of adverse  
43 757 pregnancy outcomes: a retrospective cohort study. *BMC Pregnancy Childbirth.* 2019;19(1):261.  
44 758 doi:10.1186/s12884-019-2400-x  
45  
46 759 63. Goh DA, Gan D, Kung J, et al. Child, maternal and demographic factors influencing caregiver-  
47 760 reported autistic trait symptomatology in toddlers. *J Autism Dev Disord.* 2018;48(4):1325-1337.  
48 761 doi:10.1007/s10803-018-3471-7  
49  
50 762 64. Friedlander S, Weiss DS, Traylor J. Assessing the influence of maternal depression on the  
51 763 validity of the Child Behavior Checklist. *J Abnorm Child Psychol.* 1986;14(1):123-133.  
52 764 doi:10.1007/bf00917228  
53  
54 765  
55  
56 766  
57  
58 767  
59  
60

768 **Table 1: Socio-demographic, maternal and clinical characteristics (n=509)**

| Variable                                                  | Number (%)*              |
|-----------------------------------------------------------|--------------------------|
| Sex: Male                                                 | 274 (53.8)               |
| Index of Multiple Deprivation (IMD) quintiles             |                          |
| 1 (least deprived) <sup>a</sup>                           | 65 (12.8)                |
| 2                                                         | 87 (17.2)                |
| 3                                                         | 108 (21.3)               |
| 4                                                         | 173 (34.2)               |
| 5 (most deprived)                                         | 73 (14.4)                |
| Gestational age at birth (weeks), median [range]          | 39.7 [20 – 43]           |
| Gestational category                                      |                          |
| Extremely preterm (<28 weeks)                             | 18 (3.5)                 |
| Very preterm (28-32 weeks)                                | 28 (5.5)                 |
| Late preterm (32-37 weeks)                                | 51 (10.0)                |
| Term (≥37 weeks)                                          | 412 (80.9)               |
| Birthweight (g), median [range]                           | 3290 [450 – 4750]        |
| Multiple pregnancy                                        | 54 (10.6)                |
| Maternal parity                                           |                          |
| 0                                                         | 332 (65.2)               |
| 1                                                         | 124 (24.4)               |
| 2                                                         | 32 (6.3)                 |
| 3+                                                        | 21 (4.2)                 |
| Maternal BMI (kg/m <sup>2</sup> ), median [range]         | 23.2 [15.3 – 43.6]       |
| Maternal age at infant's birth (years), mean (SD) [range] | 34.2 (4.8)<br>[17 – 52]  |
| Maternal ethnicity                                        |                          |
| White                                                     | 272 (53.4)               |
| Black/Black British                                       | 56 (11.0)                |
| Asian/Asian British                                       | 28 (5.5)                 |
| Chinese                                                   | 18 (3.5)                 |
| Mixed – White & Asian                                     | 4 (0.8)                  |
| Mixed – White & Black                                     | 4 (0.8)                  |
| Any other                                                 | 30 (5.9)                 |
| Do not wish to answer                                     | 9 (1.8)                  |
| No data                                                   | 88 (17.3)                |
| Bayley III cognitive composite score, mean (SD) [range]   | 100 (11.4)<br>[55 – 125] |
| CBCL total T score, mean (SD) [range]                     | 46.9 (9.5)<br>[28 – 69]  |
| Q-CHAT total score, mean (SD) [range]                     | 30.5 (9.3)<br>[8 – 70]   |
| EPDS score, median [range]                                | 4 [0 – 28]               |
| EPDS score, n (%)                                         |                          |
| <13                                                       | 415 (8.2)                |
| ≥13                                                       | 21 (4.1)                 |
| No data                                                   | 73 (14.3)                |

769 <sup>a</sup> Quintile 1 corresponds to the highest, least deprived, IMD rankings.

770 \* unless otherwise specified

**Table 2: CBCL and Q-CHAT model predictors using multiple imputation without interaction.** (Cf. Supplementary Table 3 for complete case analysis)

|                                             | CBCL                 |           |                | Q-CHAT               |                   |                |
|---------------------------------------------|----------------------|-----------|----------------|----------------------|-------------------|----------------|
|                                             | B [95%CI]            | p         | f <sup>2</sup> | B [95%CI]            | p                 | f <sup>2</sup> |
| <b>Maternal EPDS</b>                        | 0.93 [0.43, 1.44]    | <.001 *** | 0.05           | 0.27 [0.03, 0.52]    | .031 *            | 0.01           |
| <b>Maternal BMI</b>                         | -0.09 [-0.44, 0.26]  | .621      | -              | 0.06 [-0.13, 0.24]   | .538              | -              |
| <b>Multiple pregnancy</b>                   | 3.15 [-3.07, 9.37]   | .320      | -              | 1.33 [-2.62, 5.28]   | .509              | -              |
| <b>Parity</b>                               |                      |           |                |                      |                   |                |
| <b>1</b>                                    | -2.52 [-5.96, 0.93]  | .151      | -              | -2.14 [-4.02, -0.27] | .025 <sup>a</sup> | -              |
| <b>2</b>                                    | -3.23 [-9.16, 2.70]  | .285      | -              | 0.88 [-1.99, 3.75]   | .548              | -              |
| <b>3+</b>                                   | -1.37 [-8.36, 5.61]  | .699      | -              | -0.49 [-4.57, 3.60]  | .815              | -              |
| <b>IMD rank</b>                             | -1.48 [-3.33, 0.37]  | .117      | -              | -1.50 [-2.60, -0.40] | .008 **           | 0.02           |
| <b>Gestational age at birth (weeks)</b>     | 0.10 [-0.65, 0.85]   | .786      | -              | 0.26 [-0.17, 0.70]   | .233              | -              |
| <b>Birthweight (kg)</b>                     | 0.56 [-2.65, 3.78]   | .731      | -              | -1.24 [-2.93, 0.46]  | .151              | -              |
| <b>Sex:female</b>                           | -4.14 [-6.96, -1.31] | .004 **   | 0.06           | -1.95 [-3.42, -0.48] | .009 **           | 0.05           |
| <b>Corrected age at assessment (months)</b> | -0.90 [-2.17, 0.37]  | .166      | -              | -0.16 [-0.91, 0.59]  | .677              | -              |
| <b>Cognition</b>                            | -0.05 [-0.20, 0.09]  | .467      | -              | -0.27 [-0.35, -0.20] | <.001 ***         | 0.12           |

p<0.05 \*; p<0.01 \*\*; p<0.001 \*\*\*

CBCL model adjusted R<sup>2</sup> = 0.0676. Q-CHAT model adjusted R<sup>2</sup> = 0.193.

B = unstandardised coefficient.

CBCL = Child Behaviour Checklist score at 18 months. Q-CHAT = Quantitative Checklist for Autism in Toddlers score at 18 months. Maternal EPDS = maternal Edinburgh Postnatal Depression Scale score at term-equivalent age. Multiple pregnancy = dummy variable of twin/triplet pregnancy. Parity = dummy variable, one/two/three+ previous child(ren). Corrected age at assessment (months) = age at behavioural assessment, corrected for gestational age. Cognition = infant Bayley III score at 18 months.

<sup>a</sup> Wald test of whole parity variable in Q-CHAT model: F(3, 476.9) = 1.88, p = .133

Effect size (Cohen's f<sup>2</sup>, calculated from squared part correlations for predictors significant to 0.05): 0.02 = small, 0.15 = medium and 0.35 = large.<sup>46</sup>

- indicates data not given, as predictor not significant to 0.05.

**Table 3: CBCL and Q-CHAT model predictors using complete case analysis with interaction of ‘EPDS x term’.**

|                                             | CBCL                 |         | Q-CHAT               |           |
|---------------------------------------------|----------------------|---------|----------------------|-----------|
|                                             | B [95%CI]            | p       | B [95%CI]            | p         |
| <b>Maternal EPDS</b>                        | 0.89 [-0.24, 2.02]   | .121    | 0.24 [-0.28, 0.75]   | .365      |
| <b>Maternal BMI</b>                         | -0.01 [-0.39, 0.37]  | .955    | 0.00 [-0.16, 0.17]   | .982      |
| <b>Multiple pregnancy</b>                   | 1.76 [-6.65, 10.17]  | .681    | 0.97 [-2.07, 4.01]   | .532      |
| <b>Parity</b>                               |                      |         |                      |           |
| <b>1</b>                                    | -2.75 [-6.49, 0.99]  | .149    | -1.42 [-3.30, 0.46]  | .139      |
| <b>2</b>                                    | -3.49 [-10.36, 3.37] | .317    | 0.16 [-2.84, 3.16]   | .917      |
| <b>3+</b>                                   | -1.17 [-9.69, 7.35]  | .788    | -1.13 [-4.24, 1.98]  | .476      |
| <b>IMD rank</b>                             | -1.41 [-3.54, 0.73]  | .195    | -1.68 [-2.64, -0.72] | .001 **   |
| <b>Gestation: term</b>                      | 1.25 [-8.34, 10.85]  | .797    | 2.64 [-1.74, 7.02]   | .236      |
| <b>Birthweight (kg)</b>                     | -1.01 [-4.08, 2.05]  | .516    | -2.25 [-3.73, -0.78] | .003 **   |
| <b>Sex: female</b>                          | -4.64 [-7.83, -1.44] | .005 ** | -2.22 [-3.72, -0.71] | .004 **   |
| <b>Corrected age at assessment (months)</b> | -0.83 [-2.27, 0.62]  | .261    | -0.39 [-1.18, 0.04]  | .335      |
| <b>Cognition</b>                            | -0.03 [-0.20, 0.14]  | .720    | -0.22 [-0.29, -0.15] | <.001 *** |
| <b>EPDS x gestation:term</b>                | -0.01 [-1.30, 1.28]  | .991    | -0.02 [-0.60, 0.56]  | .950      |

p<0.05 \*; p<0.01 \*\*; p<0.001 \*\*\*

CBCL model adjusted R<sup>2</sup> = 0.0865. Q-CHAT model adjusted R<sup>2</sup> = 0.215.

B = unstandardised coefficient.

CBCL = Child Behaviour Checklist score at 18 months. Q-CHAT = Quantitative Checklist for Autism in Toddlers score at 18 months. Maternal EPDS = maternal Edinburgh Postnatal Depression Scale score at term-equivalent age. Multiple pregnancy = dummy variable of twin/triplet pregnancy. Parity = dummy variable, one/two/three+ previous child(ren). Gestation: term = dummy variable, term (≥37 weeks) vs preterm (<37 weeks) gestation at birth.

Corrected age at assessment (months) = age at behavioural assessment, corrected for gestational age. Cognition = infant Bayley III score at 18 months. EPDS x gestation:term = interaction term between maternal EPDS score and term gestation at birth.

1  
2  
3  
4  
5  
6  
7  
8  
9  
10  
11  
12  
13  
14 **Fig.1** Children's predicted CBCL scores at 18 months are positively correlated to the  
15 maternal EPDS score at term-equivalent age.  
16

17  
18  
19  
20  
21 **Fig.2** Children's predicted Q-CHAT scores at 18 months are positively correlated to the  
22 maternal EPDS score at term-equivalent age.  
23  
24  
25  
26  
27  
28  
29  
30  
31  
32  
33  
34  
35  
36  
37  
38  
39  
40  
41  
42  
43  
44  
45  
46  
47  
48  
49  
50  
51  
52  
53  
54  
55  
56  
57  
58  
59  
60

1  
2  
3  
4  
5  
6  
7  
8  
9  
10  
11  
12  
13  
14  
15  
16  
17  
18  
19  
20  
21  
22  
23  
24  
25  
26  
27  
28  
29  
30  
31  
32  
33  
34  
35  
36  
37  
38  
39  
40  
41  
42  
43  
44  
45  
46  
47  
48  
49  
50  
51  
52  
53  
54  
55  
56  
57  
58  
59  
60

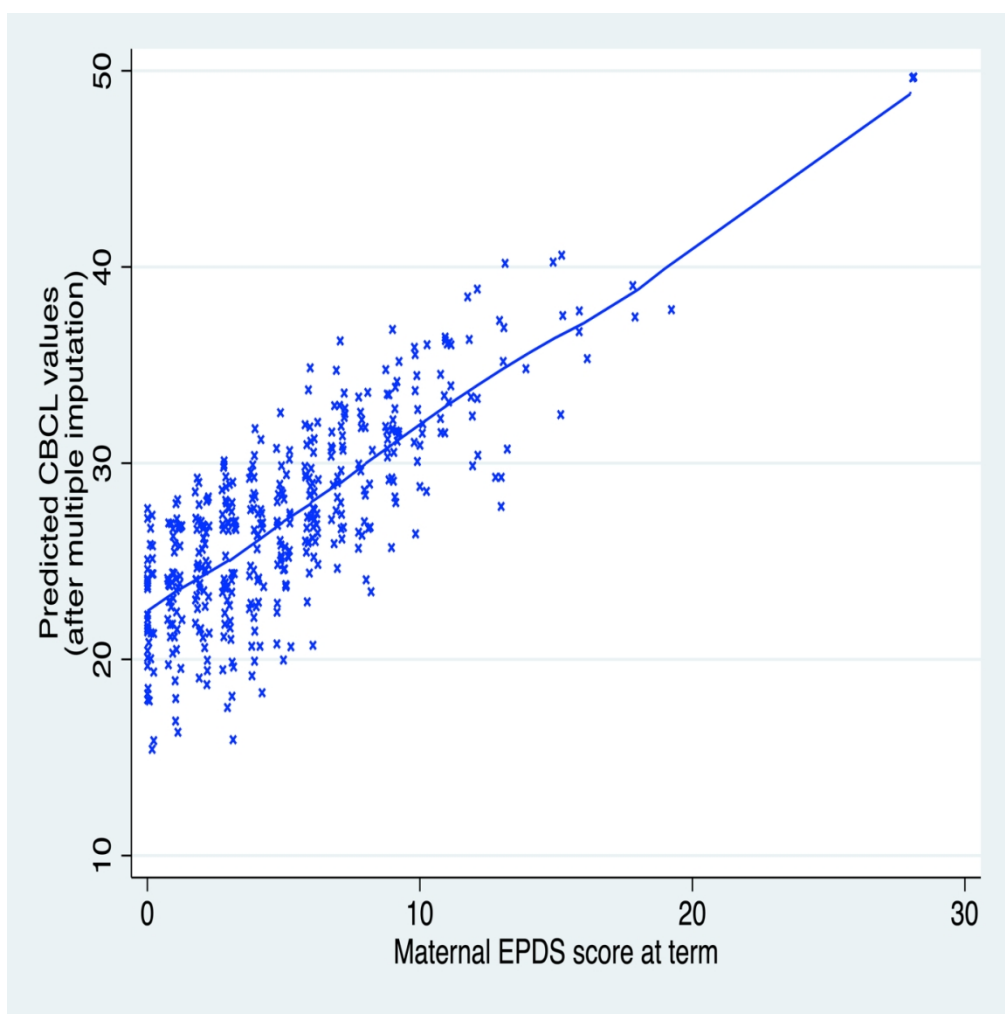

Fig.1 Children’s predicted CBCL scores at 18 months are positively correlated to the maternal EPDS score at term-equivalent age

158x158mm (220 x 220 DPI)

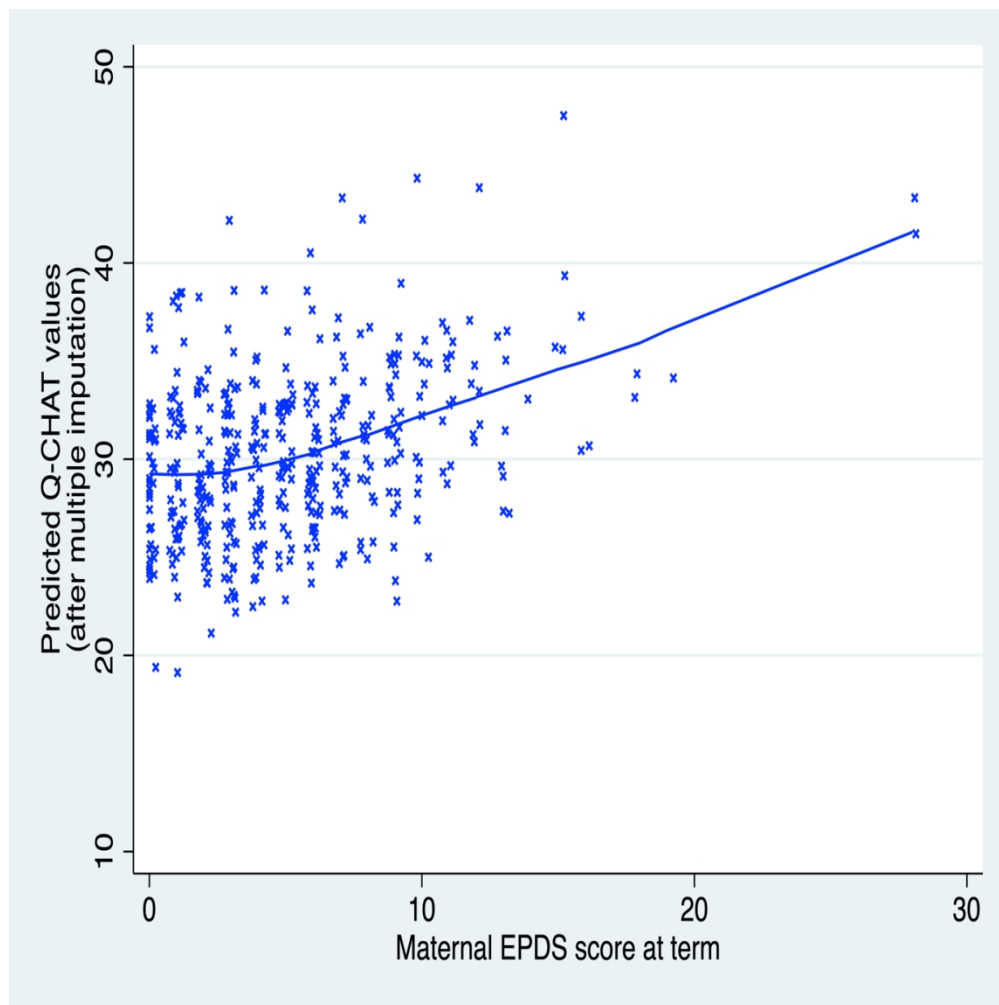

Fig.2 Children’s predicted Q-CHAT scores at 18 months are positively correlated to the maternal EPDS score at term-equivalent age.

158x158mm (220 x 220 DPI)



**Supplemental material**

**Supplementary Table 1:** CBCL internalising symptom model predictors using multiple imputation.

**Supplementary Table 2:** CBCL externalising symptom model predictors using multiple imputation.

**Supplementary Table 3:** CBCL and Q-CHAT model predictors using complete case analysis without interaction.

**Supplementary Table 4:** EPDS score predictors.

**Supplementary Table 5:** EPDS score predictors including interaction 'term x time-lag'.

**Supplementary Figure 1:** Histogram showing the distribution of maternal EPDS scores at term-equivalent age.

**Supplementary Table 1: CBCL internalising symptom model predictors using multiple imputation.**

|                                             | <b>B [95%CI]</b>     | <b>p</b> | <b>f<sup>2</sup></b> |
|---------------------------------------------|----------------------|----------|----------------------|
| <b>Maternal EPDS</b>                        | 0.22 [0.08, 0.36]    | .003 **  | 0.03                 |
| <b>Maternal BMI</b>                         | -0.04 [-0.13, 0.06]  | .436     | -                    |
| <b>Multiple pregnancy</b>                   | 0.58 [-1.10, 2.27]   | .497     | -                    |
| <b>Parity</b>                               |                      |          |                      |
| <b>1</b>                                    | -0.37 [-1.41, 0.67]  | .487     | -                    |
| <b>2</b>                                    | -1.33 [-3.09, 0.42]  | .136     | -                    |
| <b>3+</b>                                   | 0.64 [-1.34, 2.62]   | .524     | -                    |
| <b>IMD rank</b>                             | -0.41 [-0.91, 0.10]  | .115     | -                    |
| <b>Gestational age at birth (weeks)</b>     | 0.22 [-0.00, 0.44]   | .053     | -                    |
| <b>Birthweight (kg)</b>                     | -0.97 [-1.90, -0.05] | .038 *   | 0.005                |
| <b>Sex: female</b>                          | -0.51 [-1.35, 0.33]  | .232     | -                    |
| <b>Corrected age at assessment (months)</b> | 0.02 [-0.41, 0.45]   | .923     | -                    |
| <b>Cognition</b>                            | -0.05 [-0.10, -0.01] | .016 *   | 0.01                 |

p<0.05 \*; p<0.01 \*\*; p<0.001 \*\*\*

Adjusted R<sup>2</sup> = 0.0566.

B = unstandardised coefficient.

Outcome variable = Child Behaviour Checklist internalising sub-score at 18 months. Maternal EPDS = maternal Edinburgh Postnatal Depression Scale score at term-equivalent age. Multiple pregnancy = dummy variable of twin/triplet pregnancy. Parity = dummy variable, one/two/three+ previous child(ren). Corrected age at assessment (months) = age at behavioural assessment, corrected for gestational age. Cognition = infant Bayley III score at 18 months.

Effect size (Cohen's f<sup>2</sup>, calculated from squared part correlations for predictors significant to 0.05): 0.02 = small, 0.15 = medium and 0.35 = large.<sup>1</sup>

- indicates data not given, as predictor not significant to 0.05.

**Supplementary Table 2: CBCL externalising symptom model predictors using multiple imputation.**

|                                             | <b>B [95%CI]</b>     | <b>p</b>  | <b>f<sup>2</sup></b> |
|---------------------------------------------|----------------------|-----------|----------------------|
| <b>Maternal EPDS</b>                        | 0.40 [0.20, 0.61]    | <.001 *** | 0.05                 |
| <b>Maternal BMI</b>                         | 0.01 [-0.17, 0.15]   | .933      | -                    |
| <b>Multiple pregnancy</b>                   | 2.51 [-0.29, 5.31]   | .079      | -                    |
| <b>Parity</b>                               |                      |           |                      |
| <b>1</b>                                    | -1.06 [-2.53, 0.42]  | .160      | -                    |
| <b>2</b>                                    | -0.61 [-3.55, 2.33]  | .682      | -                    |
| <b>3+</b>                                   | -0.96 [-4.47, 2.56]  | .593      | -                    |
| <b>IMD rank</b>                             | -0.24 [-1.11, 0.63]  | .585      | -                    |
| <b>Gestational age at birth (weeks)</b>     | -0.07 [-0.40, 0.27]  | .701      | -                    |
| <b>Birthweight (kg)</b>                     | 1.03 [-0.38, 2.44]   | .153      | -                    |
| <b>Sex: female</b>                          | -1.80 [-3.07, -0.53] | .006 **   | 0.06                 |
| <b>Corrected age at assessment (months)</b> | -0.40 [-0.95, 0.16]  | .161      | -                    |
| <b>Cognition</b>                            | 0.03 [-0.03, 0.10]   | .322      | -                    |

p<0.05 \*; p<0.01 \*\*; p<0.001 \*\*\*

Adjusted R<sup>2</sup> = 0.0612.

B = unstandardised coefficient.

Outcome variable = Child Behaviour Checklist externalising sub-score at 18 months. Maternal EPDS = maternal Edinburgh Postnatal Depression Scale score at term-equivalent age. Multiple pregnancy = dummy variable of twin/triplet pregnancy. Parity = dummy variable, one/two/three+ previous child(ren). Corrected age at assessment (months) = age at behavioural assessment, corrected for gestational age.

Cognition = infant Bayley III score at 18 months.

Effect size (Cohen’s f<sup>2</sup>, calculated from squared part correlations for predictors significant to 0.05): 0.02 = small, 0.15 = medium and 0.35 = large.<sup>1</sup>

- indicates data not given, as predictor not significant to 0.05.

**Supplementary Table 3: CBCL and Q-CHAT model predictors using complete case analysis without interaction.**

|                                             | CBCL                 |         | Q-CHAT               |           |
|---------------------------------------------|----------------------|---------|----------------------|-----------|
|                                             | B [95%CI]            | p       | B [95%CI]            | p         |
| <b>Maternal EPDS</b>                        | 0.88 [0.35, 1.41]    | .001 ** | 0.21 [-0.02, 0.44]   | .069      |
| <b>Maternal BMI</b>                         | -0.01 [-0.38, 0.37]  | .963    | 0.01 [-0.16, 0.17]   | .930      |
| <b>Multiple pregnancy</b>                   | 1.50 [-6.87, 9.87]   | .724    | 0.43 [-2.50, 3.37]   | .772      |
| <b>Parity</b>                               |                      |         |                      |           |
| <b>1</b>                                    | -2.83 [-6.60, 0.94]  | .141    | -1.54 [-3.41, 0.34]  | .108      |
| <b>2</b>                                    | -3.49 [-10.3, 3.35]  | .316    | 0.13 [-2.85, 3.10]   | .933      |
| <b>3+</b>                                   | -1.38 [-10.0, 7.30]  | .755    | -1.43 [-4.50, 1.64]  | .360      |
| <b>IMD rank</b>                             | -1.44 [-3.56, 0.67]  | .181    | -1.75 [-2.70, -0.79] | <.001 *** |
| <b>Gestational age at birth (weeks)</b>     | 0.01 [-0.90, 0.91]   | .987    | 0.10 [-0.33, 0.54]   | .639      |
| <b>Birthweight (kg)</b>                     | -0.65 [-4.38, 3.08]  | .733    | -1.81 [-3.63, 0.00]  | .050      |
| <b>Sex: female</b>                          | -4.57 [-7.82, -1.31] | .006 ** | -2.12 [-3.60, -0.64] | .005 **   |
| <b>Corrected age at assessment (months)</b> | -0.84 [-2.26, 0.59]  | .247    | -0.41 [-1.18, 0.35]  | .290      |
| <b>Cognition</b>                            | -0.03 [-0.20, 0.13]  | .689    | -0.23 [-0.30, -0.15] | <.001 *** |

p<0.05 \*; p<0.01 \*\*; p<0.001 \*\*\*

CBCL adjusted R<sup>2</sup> = 0.0862. Q-CHAT adjusted R<sup>2</sup> = 0.2103.

B = unstandardised coefficient.

CBCL = Child Behaviour Checklist externalising sub-score at 18 months. Q-CHAT = Quantitative Checklist for Autism in Toddlers score at 18 months. Maternal EPDS = maternal Edinburgh Postnatal Depression Scale score at term-equivalent age. Multiple pregnancy = dummy variable of twin/triplet pregnancy. Parity = dummy variable, one/two/three+ previous child(ren). Gestation (weeks) = dummy variable: 34-36+6 weeks and ≥37 weeks gestation at birth. Corrected age at assessment (months) = age at behavioural assessment, corrected for gestational age. Cognition = infant Bayley III score at 18 months.

Supplementary Table 4: EPDS score predictors.

|                           | <b>IRR [95%CI]</b> | <b>p</b> |
|---------------------------|--------------------|----------|
| <b>Time-lag (weeks)</b>   | 1.01 [0.97, 1.05]  | .647     |
| <b>Gestation:term</b>     | 0.91 [0.64, 1.31]  | .627     |
| <b>IMD rank</b>           | 1.00 [1.00, 1.00]  | .103     |
| <b>Multiple pregnancy</b> | 0.66 [0.46, 0.96]  | .031 *   |
| <b>Parity</b>             |                    |          |
| <b>1</b>                  | 0.79 [0.66, 0.95]  | .011 *   |
| <b>2</b>                  | 0.87 [0.60, 1.28]  | .491     |
| <b>3+</b>                 | 0.84 [0.54, 1.31]  | .445     |
| <b>Birthweight (kg)</b>   | 0.98 [0.83, 1.17]  | .847     |
| <b>Sex:female</b>         | 1.13 [0.98, 1.31]  | .098     |

p<0.05 \*; p<0.01 \*\*; p<0.001 \*\*\*

Pseudo R<sup>2</sup> = 0.0228

IRR = incidence rate ratio

Outcome variable = maternal Edinburgh Postnatal Depression Scale (EPDS) score at term-equivalent age. Time-lag (weeks) = time in weeks between birth and EPDS assessment. Gestation:term = dummy variable, term (≥37 weeks) vs preterm (<37 weeks) gestation at birth. Multiple pregnancy = dummy variable of twin/triplet pregnancy. Parity = dummy variable, one/two/three+ previous child(ren).

**Supplementary Table 5:** EPDS score predictors including interaction 'term x time-lag'.

|                                | <b>IRR [95%CI]</b> | <b>p</b> |
|--------------------------------|--------------------|----------|
| <b>Time-lag (weeks)</b>        | 1.00 [0.97, 1.04]  | .823     |
| <b>Gestation: term</b>         | 0.88 [0.58, 1.34]  | .553     |
| <b>IMD rank</b>                | 1.00 [1.00, 1.00]  | .104     |
| <b>Multiple pregnancy</b>      | 0.66 [0.46, 0.96]  | .029 *   |
| <b>Parity</b>                  |                    |          |
| <b>1</b>                       | 0.79 [0.66, 0.95]  | .010 *   |
| <b>2</b>                       | 0.87 [0.60, 1.28]  | .480     |
| <b>3+</b>                      | 0.85 [0.55, 1.31]  | .458     |
| <b>Birthweight (kg)</b>        | 0.97 [0.83, 1.15]  | .756     |
| <b>Sex:female</b>              | 1.13 [0.98, 1.30]  | .100     |
| <b>Term x time-lag (weeks)</b> | 1.01 [0.94, 1.10]  | .735     |

p<0.05 \*; p<0.01 \*\*; p<0.001 \*\*\*

Pseudo R<sup>2</sup> = 0.0230

IRR = incidence rate ratio

Outcome variable = maternal Edinburgh Postnatal Depression Scale (EPDS) score at term-equivalent age. Time-lag (weeks) = time in weeks between birth and EPDS assessment. Gestation: term = dummy variable, term (≥37 weeks) vs preterm (<37 weeks) gestation at birth. Multiple pregnancy = dummy variable of twin/triplet pregnancy. Parity = dummy variable, one/two/three+ previous child(ren). Term x time-lag (weeks): interaction term between term gestation at birth and time-lag between birth and maternal EPDS assessment.

**Supplementary Figure 1:** Histogram showing the distribution of maternal EPDS scores at term-equivalent age.

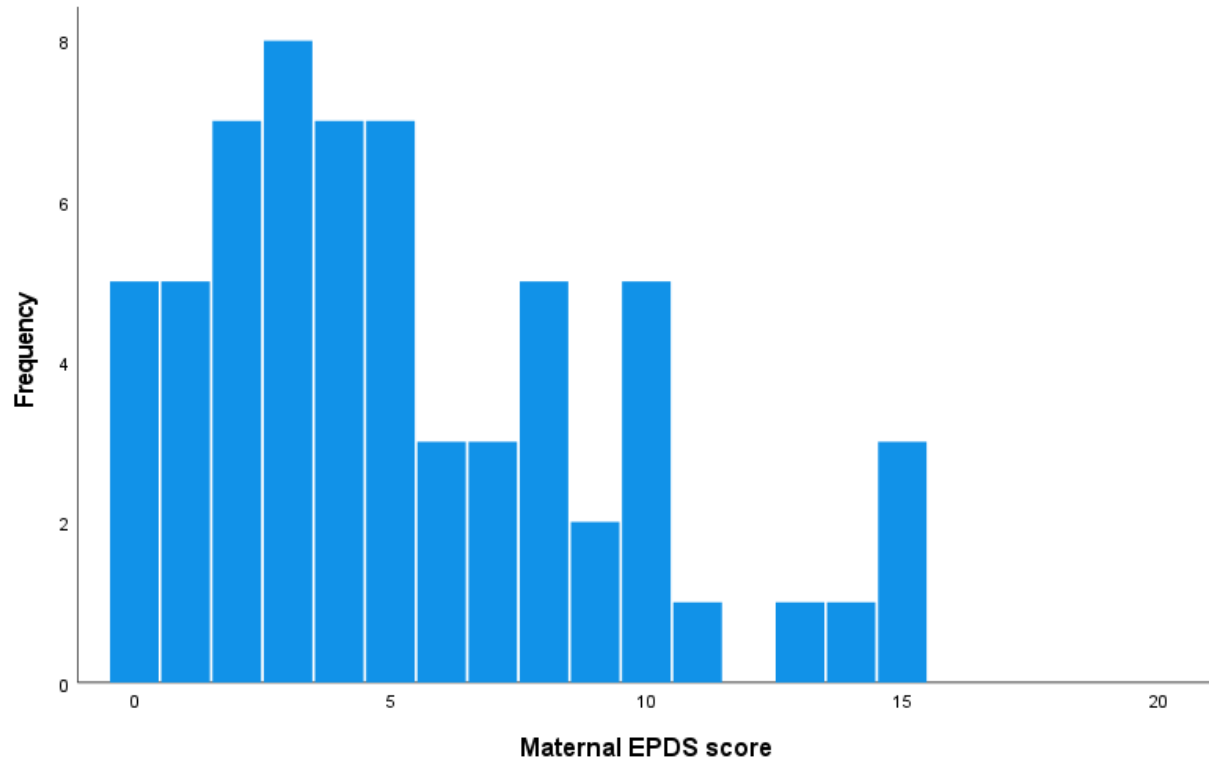

nly

1  
2  
3 **Supplemental reference list**  
4

- 5 1. Cohen J. *Statistical Power Analysis for the Behavioral Sciences*. 2nd ed. L. Erlbaum Associates; 1988.  
6  
7  
8  
9  
10  
11  
12  
13  
14  
15  
16  
17  
18  
19  
20  
21  
22  
23  
24  
25  
26  
27  
28  
29  
30  
31  
32  
33  
34  
35  
36  
37  
38  
39  
40  
41  
42  
43  
44  
45  
46

For peer review only



STROBE Statement—Checklist of items that should be included in reports of *cohort studies*

|                              | Item No | Recommendation                                                                                                                                                                                                                                                                                                         | Page No   |
|------------------------------|---------|------------------------------------------------------------------------------------------------------------------------------------------------------------------------------------------------------------------------------------------------------------------------------------------------------------------------|-----------|
| <b>Title and abstract</b>    | 1       | (a) Indicate the study's design with a commonly used term in the title or the abstract<br>(b) Provide in the abstract an informative and balanced summary of what was done and what was found                                                                                                                          | 1, 2      |
| <b>Introduction</b>          |         |                                                                                                                                                                                                                                                                                                                        |           |
| Background/rationale         | 2       | Explain the scientific background and rationale for the investigation being reported                                                                                                                                                                                                                                   | 5, 6      |
| Objectives                   | 3       | State specific objectives, including any prespecified hypotheses                                                                                                                                                                                                                                                       | 6         |
| <b>Methods</b>               |         |                                                                                                                                                                                                                                                                                                                        |           |
| Study design                 | 4       | Present key elements of study design early in the paper                                                                                                                                                                                                                                                                | 6, 7      |
| Setting                      | 5       | Describe the setting, locations, and relevant dates, including periods of recruitment, exposure, follow-up, and data collection                                                                                                                                                                                        | 7         |
| Participants                 | 6       | (a) Give the eligibility criteria, and the sources and methods of selection of participants. Describe methods of follow-up<br>(b) For matched studies, give matching criteria and number of exposed and unexposed                                                                                                      | 7         |
| Variables                    | 7       | Clearly define all outcomes, exposures, predictors, potential confounders, and effect modifiers. Give diagnostic criteria, if applicable                                                                                                                                                                               | 7, 8      |
| Data sources/<br>measurement | 8*      | For each variable of interest, give sources of data and details of methods of assessment (measurement). Describe comparability of assessment methods if there is more than one group                                                                                                                                   | 7, 8      |
| Bias                         | 9       | Describe any efforts to address potential sources of bias                                                                                                                                                                                                                                                              | 9         |
| Study size                   | 10      | Explain how the study size was arrived at                                                                                                                                                                                                                                                                              | 7         |
| Quantitative variables       | 11      | Explain how quantitative variables were handled in the analyses. If applicable, describe which groupings were chosen and why                                                                                                                                                                                           | 9, 10     |
| Statistical methods          | 12      | (a) Describe all statistical methods, including those used to control for confounding<br>(b) Describe any methods used to examine subgroups and interactions<br>(c) Explain how missing data were addressed<br>(d) If applicable, explain how loss to follow-up was addressed<br>(e) Describe any sensitivity analyses | 9, 10, 11 |
| <b>Results</b>               |         |                                                                                                                                                                                                                                                                                                                        |           |
| Participants                 | 13*     | (a) Report numbers of individuals at each stage of study—eg numbers potentially eligible, examined for eligibility, confirmed eligible, included in the study, completing follow-up, and analysed<br>(b) Give reasons for non-participation at each stage<br>(c) Consider use of a flow diagram                        | 7, 11     |
| Descriptive data             | 14*     | (a) Give characteristics of study participants (eg demographic, clinical, social) and information on exposures and potential confounders<br>(b) Indicate number of participants with missing data for each variable of interest<br>(c) Summarise follow-up time (eg, average and total amount)                         | 9, 11     |
| Outcome data                 | 15*     | Report numbers of outcome events or summary measures over time                                                                                                                                                                                                                                                         | 11        |

|    |                          |    |                                                                                                                                                                                                              |                  |
|----|--------------------------|----|--------------------------------------------------------------------------------------------------------------------------------------------------------------------------------------------------------------|------------------|
| 1  | Main results             | 16 | (a) Give unadjusted estimates and, if applicable, confounder-adjusted estimates and their precision (eg, 95% confidence interval). Make clear which confounders were adjusted for and why they were included | 11,<br>12        |
| 2  |                          |    | (b) Report category boundaries when continuous variables were categorized                                                                                                                                    |                  |
| 3  |                          |    | (c) If relevant, consider translating estimates of relative risk into absolute risk for a meaningful time period                                                                                             |                  |
| 4  |                          |    |                                                                                                                                                                                                              |                  |
| 5  |                          |    |                                                                                                                                                                                                              |                  |
| 6  |                          |    |                                                                                                                                                                                                              |                  |
| 7  |                          |    |                                                                                                                                                                                                              |                  |
| 8  |                          |    |                                                                                                                                                                                                              |                  |
| 9  | Other analyses           | 17 | Report other analyses done—eg analyses of subgroups and interactions, and sensitivity analyses                                                                                                               | 11,<br>12        |
| 10 |                          |    |                                                                                                                                                                                                              |                  |
| 11 | <b>Discussion</b>        |    |                                                                                                                                                                                                              |                  |
| 12 |                          |    |                                                                                                                                                                                                              |                  |
| 13 | Key results              | 18 | Summarise key results with reference to study objectives                                                                                                                                                     | 12               |
| 14 | Limitations              | 19 | Discuss limitations of the study, taking into account sources of potential bias or imprecision. Discuss both direction and magnitude of any potential bias                                                   | 15,<br>16,<br>17 |
| 15 |                          |    |                                                                                                                                                                                                              |                  |
| 16 |                          |    |                                                                                                                                                                                                              |                  |
| 17 | Interpretation           | 20 | Give a cautious overall interpretation of results considering objectives, limitations, multiplicity of analyses, results from similar studies, and other relevant evidence                                   | 13,<br>14,<br>17 |
| 18 |                          |    |                                                                                                                                                                                                              |                  |
| 19 |                          |    |                                                                                                                                                                                                              |                  |
| 20 | Generalisability         | 21 | Discuss the generalisability (external validity) of the study results                                                                                                                                        | 13,<br>14        |
| 21 |                          |    |                                                                                                                                                                                                              |                  |
| 22 | <b>Other information</b> |    |                                                                                                                                                                                                              |                  |
| 23 |                          |    |                                                                                                                                                                                                              |                  |
| 24 | Funding                  | 22 | Give the source of funding and the role of the funders for the present study and, if applicable, for the original study on which the present article is based                                                | 3                |
| 25 |                          |    |                                                                                                                                                                                                              |                  |

\*Give information separately for exposed and unexposed groups.

**Note:** An Explanation and Elaboration article discusses each checklist item and gives methodological background and published examples of transparent reporting. The STROBE checklist is best used in conjunction with this article (freely available on the Web sites of PLoS Medicine at <http://www.plosmedicine.org/>, Annals of Internal Medicine at <http://www.annals.org/>, and Epidemiology at <http://www.epidem.com/>). Information on the STROBE Initiative is available at <http://www.strobe-statement.org>.

# BMJ Open

## Postnatal maternal depressive symptoms and behavioural outcomes in term- and preterm-born toddlers: a longitudinal UK community cohort study.

|                                 |                                                                                                                                                                                                                                                                                                                                                                                                                                                                                                                                                                                                                                                                                                                                                                                                                                                                                                                                                                                                                                                                                                                                                                                                                                                                                                                                                                                                                                                                                                                                                                                                                                                                                                                                                                                      |
|---------------------------------|--------------------------------------------------------------------------------------------------------------------------------------------------------------------------------------------------------------------------------------------------------------------------------------------------------------------------------------------------------------------------------------------------------------------------------------------------------------------------------------------------------------------------------------------------------------------------------------------------------------------------------------------------------------------------------------------------------------------------------------------------------------------------------------------------------------------------------------------------------------------------------------------------------------------------------------------------------------------------------------------------------------------------------------------------------------------------------------------------------------------------------------------------------------------------------------------------------------------------------------------------------------------------------------------------------------------------------------------------------------------------------------------------------------------------------------------------------------------------------------------------------------------------------------------------------------------------------------------------------------------------------------------------------------------------------------------------------------------------------------------------------------------------------------|
| Journal:                        | <i>BMJ Open</i>                                                                                                                                                                                                                                                                                                                                                                                                                                                                                                                                                                                                                                                                                                                                                                                                                                                                                                                                                                                                                                                                                                                                                                                                                                                                                                                                                                                                                                                                                                                                                                                                                                                                                                                                                                      |
| Manuscript ID                   | bmjopen-2021-058540.R3                                                                                                                                                                                                                                                                                                                                                                                                                                                                                                                                                                                                                                                                                                                                                                                                                                                                                                                                                                                                                                                                                                                                                                                                                                                                                                                                                                                                                                                                                                                                                                                                                                                                                                                                                               |
| Article Type:                   | Original research                                                                                                                                                                                                                                                                                                                                                                                                                                                                                                                                                                                                                                                                                                                                                                                                                                                                                                                                                                                                                                                                                                                                                                                                                                                                                                                                                                                                                                                                                                                                                                                                                                                                                                                                                                    |
| Date Submitted by the Author:   | 05-Aug-2022                                                                                                                                                                                                                                                                                                                                                                                                                                                                                                                                                                                                                                                                                                                                                                                                                                                                                                                                                                                                                                                                                                                                                                                                                                                                                                                                                                                                                                                                                                                                                                                                                                                                                                                                                                          |
| Complete List of Authors:       | <p>Kleine, Ira; King's College London, Centre for the Developing Brain, School of Bioengineering and Imaging Sciences, Faculty of Life Sciences &amp; Medicine</p> <p>Vamvakas, George; King's College London, Department of Biostatistics and Health Informatics, Institute of Psychiatry, Psychology and Neuroscience</p> <p>Lautarescu, Alexandra; King's College London, Centre for the Developing Brain, School of Bioengineering and Imaging Sciences, Faculty of Life Sciences &amp; Medicine; King's College London, Forensic and Neurodevelopmental Sciences, Institute of Psychiatry, Psychology and Neuroscience</p> <p>Falconer, Shona; King's College London, Centre for the Developing Brain, School of Bioengineering and Imaging Sciences, Faculty of Life Sciences &amp; Medicine</p> <p>Chew, Andrew; King's College London, Centre for the Developing Brain, School of Bioengineering and Imaging Sciences, Faculty of Life Sciences &amp; Medicine</p> <p>Counsell, Serena ; King's College London, Centre for the Developing Brain, School of Bioengineering and Imaging Sciences, Faculty of Life Sciences &amp; Medicine</p> <p>Pickles, Andrew; King's College London, Department of Biostatistics and Health Informatics, Institute of Psychiatry, Psychology and Neuroscience</p> <p>Edwards, David; King's College London, Centre for the Developing Brain, School of Bioengineering and Imaging Sciences, Faculty of Life Sciences &amp; Medicine</p> <p>Nosarti, Chiara; King's College London, Centre for the Developing Brain, School of Bioengineering and Imaging Sciences, Faculty of Life Sciences &amp; Medicine; King's College London, Department of Child and Adolescent Psychiatry, Institute of Psychiatry, Psychology and Neuroscience</p> |
| <b>Primary Subject Heading</b>: | Mental health                                                                                                                                                                                                                                                                                                                                                                                                                                                                                                                                                                                                                                                                                                                                                                                                                                                                                                                                                                                                                                                                                                                                                                                                                                                                                                                                                                                                                                                                                                                                                                                                                                                                                                                                                                        |
| Secondary Subject Heading:      | Paediatrics                                                                                                                                                                                                                                                                                                                                                                                                                                                                                                                                                                                                                                                                                                                                                                                                                                                                                                                                                                                                                                                                                                                                                                                                                                                                                                                                                                                                                                                                                                                                                                                                                                                                                                                                                                          |
| Keywords:                       | MENTAL HEALTH, Child & adolescent psychiatry < PSYCHIATRY, Developmental neurology & neurodisability < PAEDIATRICS, Depression & mood disorders < PSYCHIATRY, NEONATOLOGY                                                                                                                                                                                                                                                                                                                                                                                                                                                                                                                                                                                                                                                                                                                                                                                                                                                                                                                                                                                                                                                                                                                                                                                                                                                                                                                                                                                                                                                                                                                                                                                                            |

1  
2  
3  
4  
5  
6  
7  
8  
9  
10  
11  
12  
13  
14  
15  
16  
17  
18  
19  
20  
21  
22  
23  
24  
25  
26  
27  
28  
29  
30  
31  
32  
33  
34  
35  
36  
37  
38  
39  
40  
41  
42  
43  
44  
45  
46  
47  
48  
49  
50  
51  
52  
53  
54  
55  
56  
57  
58  
59  
60



SCHOLARONE™  
Manuscripts



I, the Submitting Author has the right to grant and does grant on behalf of all authors of the Work (as defined in the below author licence), an exclusive licence and/or a non-exclusive licence for contributions from authors who are: i) UK Crown employees; ii) where BMJ has agreed a CC-BY licence shall apply, and/or iii) in accordance with the terms applicable for US Federal Government officers or employees acting as part of their official duties; on a worldwide, perpetual, irrevocable, royalty-free basis to BMJ Publishing Group Ltd ("BMJ") its licensees and where the relevant Journal is co-owned by BMJ to the co-owners of the Journal, to publish the Work in this journal and any other BMJ products and to exploit all rights, as set out in our [licence](#).

The Submitting Author accepts and understands that any supply made under these terms is made by BMJ to the Submitting Author unless you are acting as an employee on behalf of your employer or a postgraduate student of an affiliated institution which is paying any applicable article publishing charge ("APC") for Open Access articles. Where the Submitting Author wishes to make the Work available on an Open Access basis (and intends to pay the relevant APC), the terms of reuse of such Open Access shall be governed by a Creative Commons licence – details of these licences and which [Creative Commons](#) licence will apply to this Work are set out in our licence referred to above.

Other than as permitted in any relevant BMJ Author's Self Archiving Policies, I confirm this Work has not been accepted for publication elsewhere, is not being considered for publication elsewhere and does not duplicate material already published. I confirm all authors consent to publication of this Work and authorise the granting of this licence.

1  
2  
3 **1 Postnatal maternal depressive symptoms and behavioural outcomes in term- and**  
4 **2 preterm-born toddlers: a longitudinal UK community cohort study.**

5  
6 3 Kleine, I<sup>a</sup> (MBBS); Vamvakas, G<sup>b</sup> (MSc); Lautarescu A<sup>a,c</sup> (MPhil); Falconer, S<sup>a</sup> (PhD); Chew  
7  
8 A<sup>a</sup> (MD); Counsell SJ<sup>a</sup> (PhD); Pickles, A<sup>b</sup> (FMedSci); Edwards, AD<sup>a</sup> (FMedSci); Nosarti, C<sup>a,d</sup>  
9 (PhD).  
10  
11  
12 6

13  
14 7 <sup>a</sup> Centre for the Developing Brain, School of Bioengineering and Imaging Sciences, Faculty  
15  
16 8 of Life Sciences & Medicine, King's College London, St Thomas' Hospital, London SE1  
17  
18 9 7EH, UK.

19 10 <sup>b</sup> Department of Biostatistics and Health Informatics, Institute of Psychiatry, Psychology and  
20  
21 11 Neuroscience, King's College London, London SE5 8AF, UK.

22 12 <sup>c</sup> Forensic and Neurodevelopmental Sciences, Institute of Psychiatry, Psychology and  
23  
24 13 Neuroscience, King's College London, London SE5 8AF, UK.

25 14 <sup>d</sup> Department of Child and Adolescent Psychiatry, Institute of Psychiatry, Psychology and  
26  
27 15 Neuroscience, King's College London, London SE5 8AF, UK.  
28  
29 16

30  
31 **17 Post-publication corresponding author's contact information**

32 18 Prof Chiara Nosarti

33  
34 19 Centre for the Developing Brain, School of Bioengineering and Imaging Sciences

35  
36 20 King's College London

37  
38 21 St Thomas' Hospital

39  
40 22 London

41  
42 23 SE1 7EH

43  
44 24 UK

45  
46 25 chiara.nosarti@kcl.ac.uk

47  
48 26 +44 (0)207 848 0133  
49  
50 27  
51 28  
52 29  
53 30  
54 31  
55 32  
56 33  
57 34  
58 35  
59 36  
60 37

1  
2  
3 35 **Abstract**

4 36 **Objectives:** To examine the association between maternal depressive symptoms in the  
5 37 immediate postnatal period and offspring's behavioural outcomes in a large cohort of term-  
6 38 and preterm-born toddlers.

7 39 **Design and Participants:** Data were drawn from the Developing Human Connectome  
8 40 Project. Maternal postnatal depressive symptoms were assessed at term-equivalent age, and  
9 41 children's outcomes were evaluated at a median corrected age of 18.4 months (range 17.3 –  
10 42 24.3).

11 43 **Exposure and outcomes:** Preterm birth was defined as <37 weeks completed gestation.  
12 44 Maternal depressive symptoms were assessed with the Edinburgh Postnatal Depression Scale  
13 45 (EPDS). Toddlers' outcome measures were parent-rated Child Behaviour Checklist 1<sup>1/2</sup>-5  
14 46 Total (CBCL) and Quantitative Checklist for Autism in Toddlers (Q-CHAT) scores.  
15 47 Toddlers' cognition was assessed with the Bayley Scales of Infant and Toddler Development  
16 48 – Third Edition (Bayley-III).

17 49 **Results:** Higher maternal EPDS scores were associated with toddlers' higher CBCL (B=0.93,  
18 50 95% CI 0.43-1.44, p<0.001, f<sup>2</sup>=0.05) and Q-CHAT scores (B=0.27, 95% CI 0.03-0.52,  
19 51 p=.031, f<sup>2</sup>=0.01). Maternal EPDS, toddlers' CBCL and Q-CHAT scores did not differ  
20 52 between preterm (n=97; 19.1% of the total sample) and term participants. Maternal EPDS  
21 53 score did not disproportionately affect preterm children with respect to CBCL or Q-CHAT  
22 54 scores.

23 55 **Conclusions:** Our findings indicate that children whose mothers reported increased  
24 56 depressive symptoms in the early postnatal period, including subclinical symptoms, exhibit  
25 57 more parent-reported behavioural problems in toddlerhood. These associations were  
26 58 independent of gestational age. Further research is needed to confirm the clinical significance  
27 59 of these findings.  
28 60  
29 61  
30 62  
31 63  
32 64  
33 65  
34 66  
35 67  
36 68

1  
2  
3 69 **Strengths and limitations of this study**  
4

- 5 70 • Prospective study with a large sample, using multiple imputation to reduce non-  
6 response bias.  
7 71  
8 72 • Maternal depressive symptoms assessed as a continuous variable, providing more  
9 nuanced information about the significance of subclinical symptoms.  
10 73  
11 74 • Maternal depressive symptoms assessed earlier than in previous studies, enabling  
12 recognition of early screening opportunities for families.  
13 75  
14 76 • Potential common method variance bias through parent-completed child behavioural  
15 assessments.  
16 77  
17 78 • Unknown paternal and parental factors, such as comorbid psychiatric conditions, that  
18 may confound our findings.  
19 79  
20  
21  
22  
23 80

24 81 **Keywords**

25  
26 82 Postpartum Depression; Child Development; Autism; Mental Health; Child Behavior; Mood  
27 Disorder; Preterm Birth.  
28 83  
29  
30  
31  
32  
33  
34  
35  
36  
37  
38  
39  
40  
41  
42  
43  
44  
45  
46  
47  
48  
49  
50  
51  
52  
53  
54  
55  
56  
57 100  
58  
59 101  
60



## 102 **Introduction**

103 Postnatal depression affects approximately 12% of mothers worldwide.<sup>1</sup> In contrast to ‘baby  
104 blues’, which is a state of emotional lability that affects between 13.7%-76.0% of women in  
105 the first few days after birth and typically resolves spontaneously within two weeks,<sup>2</sup>  
106 postnatal depression is more severe and starts in the first few months post-partum<sup>1</sup>. Stressful  
107 life events have been linked to a heightened risk of developing postnatal depression;<sup>3</sup> for  
108 example, mothers of preterm infants have a significantly higher risk of postpartum depression  
109 compared to mothers of term infants,<sup>4</sup> likely due to heightened stress associated with  
110 perinatal complications.<sup>5</sup>

111  
112 Women with postnatal depression tend to be less responsive to their baby’s needs and to  
113 display less affection.<sup>6</sup> Therefore, in the short-term postpartum depression may affect mother-  
114 infant interactions<sup>7</sup> and in the long-term it may lead to alterations in brain development,<sup>8</sup>  
115 emotional difficulties,<sup>9</sup> less secure attachment, cognitive and behavioural problems in  
116 childhood, and a possible increased risk of autism spectrum disorder (ASD).<sup>10,11</sup> Large cohort  
117 studies, such as the Avon Longitudinal Study of Parents and Children (ALSPAC), have  
118 shown that these associations are even evident when maternal depression is measured on a  
119 continuum of symptoms rather than a dichotomous diagnosis,<sup>12-14</sup> supporting the notion that  
120 elevated sub-diagnostic psychiatric symptoms can also negatively impact on children’s  
121 development.<sup>15</sup>

122  
123 Studies investigating the underlying causes that may link maternal postnatal depression to  
124 child outcomes have implicated several biological and environmental variables. For instance,  
125 genetic and epigenetic factors have been shown to both mediate and mitigate the  
126 intergenerational transmission of psychiatric disorders,<sup>16</sup> while lower quality parenting,  
127 interparental conflict, and socioeconomic deprivation have been shown to exacerbate  
128 children’s developmental risk of emotional and behavioural problems.<sup>11</sup> In addition, being  
129 born preterm (i.e. <37 weeks’ gestation, as per the World Health Organization definition<sup>17</sup>)  
130 has been associated with alterations in early brain development,<sup>18</sup> as well as neurological,  
131 behavioural and cognitive problems in childhood and beyond.<sup>19,20</sup> Therefore, it is complex to  
132 disentangle the possible effects of postnatal maternal mental health and those of perinatal  
133 clinical factors on specific outcomes in preterm children, as these may involve both maternal  
134 psychosocial and biological variables, as well as child preterm-related neurodevelopmental  
135 morbidity.

136

137 Furthermore, a question that remains unanswered is whether preterm birth accentuates the  
138 association between maternal postnatal depression and child outcome. Two theoretical  
139 frameworks exist that hypothesise certain infants may be influenced differently by external  
140 stimuli: the diathesis stress model proposes that certain vulnerability factors make affected  
141 infants more prone to suboptimal environmental influences with subsequent poorer  
142 outcomes,<sup>21,22</sup> whereas the differential susceptibility model frames such factors as plasticity-  
143 mediating, thus leading to poorer outcomes in negative environments, as well as better  
144 outcomes in supportive environments.<sup>22,23</sup> Previous studies investigating differential  
145 susceptibility have shown mixed findings studying a range of environmental and clinical  
146 exposures,<sup>24,25</sup> with child outcomes including attachment, internalising and externalising  
147 behaviour, and academic competence.<sup>25</sup> Both low birthweight in term infants (small for  
148 gestational age, SGA)<sup>26</sup> and preterm birth (PTB)<sup>23,24,27</sup> have been explored as distinct  
149 potential susceptibility factors. This distinction is based on the different pathophysiological  
150 processes underlying the respective conditions of SGA and PTB, both, or a combination, of  
151 which can cause low birthweight.<sup>28</sup> For example, SGA is a marker of intra-uterine growth  
152 restriction related to placental dysfunction,<sup>29</sup> whereas PTB can be caused by a multitude of  
153 factors, including infection and inflammation.<sup>30</sup>

154

155 Given that mothers of preterm children experience elevated levels of distress,<sup>31</sup> are at high  
156 risk of developing postnatal depression,<sup>32</sup> and that preterm children themselves are vulnerable  
157 to psychiatric sequelae,<sup>33</sup> in addition to investigating the association between very early  
158 maternal postnatal depressive symptoms and child behavioural and emotional outcomes, we  
159 further aimed to investigate the interaction between preterm birth and maternal depressive  
160 symptoms on child outcomes. Previous work focusing on the differential susceptibility of  
161 preterm born children to various environmental stimuli, as described above, had not yet  
162 studied maternal depressive symptoms as a proposed exposure. We specifically aimed to  
163 investigate the continuum of maternal depressive symptoms rather than solely focussing on  
164 clinically significant maternal depression, so as to provide more nuanced information about  
165 the importance of subclinical depressive symptoms on child outcomes. We hypothesised that  
166 early postnatal maternal depressive symptoms would be more elevated in mothers of preterm  
167 compared to term infants and that these would impact preterm children's behavioural and  
168 emotional outcomes to a greater degree than their term counterparts.

169

## 170 **Methods**

### 171 **Sample**

172 Participants were enrolled in the Developing Human Connectome Project (DHCP,  
173 <http://www.developingconnectome.org/>), a neuroimaging-focused project, with eligibility  
174 criteria including pregnant women (aged  $\geq 16$  years) with a gestational age of 20–42 weeks,  
175 and newborn infants aged 24–44 weeks; infants enrolled in the DHCP had magnetic  
176 resonance imaging (MRI) at term-equivalent age. Exclusion criteria for the DHCP included:  
177 contraindications to MRI, babies being too unwell to tolerate a scan, and language difficulties  
178 preventing informed consent.<sup>34</sup> Toddlers were invited to the Centre for the Developing Brain,  
179 St Thomas' Hospital, London, for neurodevelopmental assessment at 18 months post-  
180 expected delivery date; appointments were made according to family availability as close as  
181 possible to this time-point. Inclusion criteria for our follow-up study were: mother and baby  
182 attendance for MRI at term-equivalent age; completed toddler neurodevelopmental  
183 assessment. These inclusion criteria were met by 509 toddlers by the date of closure for this  
184 analysis (26/02/2020). Of the 509 toddlers, 51 were one of a twin pregnancy, and three were  
185 one of a triplet pregnancy; the sample contained 22 sibling pairs and one set of triplets. This  
186 study was approved by the UK National Research Ethics Authority (14/LO/1169) and  
187 conducted in accordance with the World Medical Association's Code of Ethics (Declaration  
188 of Helsinki). Written informed consent was given by children's carer(s) at recruitment into  
189 the study.

### 191 **Maternal variables**

192 Maternal age, parity, Body Mass Index (BMI), ethnicity and postcode were collected at  
193 enrolment into the DHCP study. Our sample was ethnically representative of the surrounding  
194 geographical area. Parity was coded as 0, 1, 2, or  $\geq 3$  previous children. Index of Multiple  
195 Deprivation (IMD) rank was computed from the current maternal postcode using the 2019  
196 IMD classification; it combines locality-specific information about income, employment,  
197 education, health, crime, housing and living environment, thus providing a proxy for family  
198 socioeconomic status.<sup>35</sup> Lower IMD rank corresponds to greater social deprivation. Our  
199 sample was generally less deprived than the surrounding geographical areas, as well as the  
200 UK as a whole, reflecting trends observed in other UK longitudinal studies.<sup>36</sup>

201  
202 *Maternal depressive symptoms* were measured using the Edinburgh Postnatal Depression  
203 Scale (EPDS)<sup>37</sup> on the day of infant's MRI at term-equivalent age. Mothers of infants born at

1  
2  
3 204 term were tested in the first few weeks postnatally, whereas mothers of preterm-born infants  
4 205 were tested once they reached term-corrected age. The EPDS is a 10-item screening  
5 206 questionnaire completed by mothers, with higher scores reflecting a higher likelihood of  
6 207 depressive disorders. A score of 13 can be used as a cut-off indicating high-level symptoms,  
7 208 although a cut-off of 11 maximises the sensitivity and specificity of the screening tool for  
8 209 depression.<sup>38</sup> Mothers completed the EPDS independently in a private room in our Centre,  
9 210 with no interaction with the researcher. Participants were informed that the results would be  
10 211 discussed with them, and consented to information being shared with their General  
11 212 Practitioner in the case of high scores. The EPDS questionnaire was scored by a member of  
12 213 the DHCP team.<sup>34</sup>  
13  
14  
15  
16  
17  
18  
19  
20  
21  
22

### 23 Child variables

24 216 Infant *clinical characteristics* were gathered from clinical notes where available, or from  
25 217 maternal report, and included: sex, gestational age at birth, birth weight, and pregnancy size  
26 218 (singleton/twin/triplet).  
27  
28  
29  
30

31 220 *Behavioural outcomes* were assessed using the Child Behaviour Checklist/1<sup>1/2</sup>-5 (CBCL), a  
32 221 parent-completed 100-item questionnaire, in which the parent rates the child's behaviour over  
33 222 the preceding two months using a 3-point Likert scale ("not true", "somewhat or sometimes  
34 223 true", and "very true or often true"). Responses are categorised into syndrome profiles, and  
35 224 these are subsequently grouped into internalising (emotional reactivity, anxiety/depression,  
36 225 somatic complaints, and withdrawal), externalising (attention problems, aggressive  
37 226 behaviour) and total (internalising, externalising, sleep and other) problem scales. Higher  
38 227 scores indicate increased emotional and behavioural problems. Total scores are classified into  
39 228 a normal range (<83<sup>rd</sup> centile, T <60), borderline range (83<sup>rd</sup>-90<sup>th</sup> centile, T 60-63), and  
40 229 clinical range (>90<sup>th</sup> centile, T ≥64).<sup>39</sup> The CBCL is known to have high reliability, validity  
41 230 and cross-informant agreement for measuring children's emotional and behavioural  
42 231 problems.<sup>39</sup>  
43  
44  
45  
46  
47  
48  
49  
50  
51  
52

53 233 We used the Quantitative Checklist for Autism in Toddlers (Q-CHAT) as an additional  
54 234 behavioural screening tool to broaden the exploration of mental health outcomes in toddlers.  
55 235 The Q-CHAT is a parent-completed 25-item questionnaire, in which the child's behaviour is  
56 236 scored on a 5-point (0-4) frequency scale. Higher total scores correspond to a higher  
57 237 frequency of behaviours also observed in autism spectrum conditions. The Q-CHAT shows

1  
2  
3 238 good test-retest reliability, face validity and specificity, yet poor positive predictive value for  
4  
5 239 autism,<sup>40,41</sup> highlighting that higher Q-CHAT scores may reflect developmental immaturity  
6  
7 240 rather than autism.<sup>41</sup>

8  
9 241  
10 242 *Cognitive assessment* was performed using the Bayley Scales of Infant and Toddler  
11  
12 243 Development – Third Edition (Bayley-III). The Bayley-III provides scores for a child's  
13  
14 244 overall cognitive, language and motor development. The cognitive standardised composite  
15  
16 245 score was used in this study; scores between 70-84 indicate mild cognitive impairment,  
17  
18 246 scores between 55-69 indicate moderate impairment, and scores lower than 55 indicate severe  
19  
20 247 impairment<sup>42</sup>. Reliability and validity of the Bayley-III have been shown to be robust,<sup>43</sup>  
21  
22 248 although some studies report its underestimation of developmental problems.<sup>44</sup>

23  
24 250 Assessments were carried out by staff experienced in the neurocognitive assessments of  
25  
26 251 toddlers.

27 252  
28  
29 253 Analysis

30  
31 254 Descriptive statistics and one-way ANOVA tests were performed in IBM SPSS Statistics for  
32  
33 255 Windows v.25. All other analyses were carried out in Stata v.16.

34 256  
35  
36 257 Multiple imputation (MI) was carried out to account for missing data in CBCL (11/509,  
37  
38 258 2.24%), Q-CHAT (9/509, 1.8%), maternal EPDS (73/509, 14.3%), maternal BMI (27/509,  
39  
40 259 5.3%) and IMD rank (3/509, 0.6%). Variables were imputed simultaneously using the 'mi  
41  
42 260 impute chained' procedure that performs imputation by chained equations. The imputation  
43  
44 261 models had the same structural form as the analysis models, and included all variables that  
45  
46 262 appear in the corresponding analysis models (maternal EPDS, maternal BMI, multiple  
47  
48 263 pregnancy, parity, IMD rank, gestational age at birth, birthweight, sex, corrected age at  
49  
50 264 assessment, and Bayley III Cognitive Composite score). In the imputation models we also  
51  
52 265 included variables that were associated with the incomplete variables at the 20% level. As  
53  
54 266 such, maternal age was included in the imputation model because it was found to be a  
55  
56 267 significant predictor of the total CBCL raw score (p=0.001), the Q-CHAT score (p=0.021)  
57  
58 268 and EPDS score (p=0.122) when it was included as an independent variable in regression  
59  
60 269 models.

270

1  
2  
3 271 Maternal EPDS and CBCL were imputed using Poisson regression; Q-CHAT, maternal BMI,  
4 272 and the IMD rank were imputed using linear regression. 40 MI datasets were created. To  
5 273 assess the stability of our MI parameters, we extracted the Monte Carlo error of each  
6  
7 274 parameter estimate and examined whether the error for the coefficient was less than 10% of  
8  
9 275 the parameter's standard error estimate. MI estimates were used for the primary analyses and  
10  
11 276 compared to the estimates from complete-case (CC, individuals who had no missing data pre-  
12  
13 277 imputation) analyses. Conditional normality was inspected in the complete-case analyses  
14  
15 278 using QQ plots of the residuals of the models. Sensitivity analyses with and without extreme  
16  
17 279 values were conducted. Initially, we fit the model using all available data, constructed the  
18  
19 280 residuals and examined the QQ plot. Extreme values were then removed, models re-fitted  
20  
21 281 without these values, and new QQ plots of residuals constructed again to check for any new  
22  
23 282 extreme values. This process was repeated as many times as needed to remove all extreme  
24  
25 283 values. During this process, the resulting estimates from the models were being examined as  
26  
27 284 to whether they had substantially changed. We found that the removal of extreme values did  
28  
29 285 not make any difference to the estimated parameters, and hence present the results from the  
30  
31 286 full sample.

32  
33 287  
34 288 The analysis models were multiple linear regressions fitted using the 'mi estimate' procedure,  
35 289 which estimates effects after application of Rubin's rules.<sup>45</sup> To account for the small amount  
36 290 of clustering in our data (twin/triplet siblings), the models' standard errors were obtained  
37 291 using Stata's robust cluster estimator 'vce(cluster *idvar*)'. For continuous variables, Cohen's  
38 292 f-squared effect sizes were calculated using  $f^2 = (R_{AB}^2 - R_A^2)/(1 - R_{AB}^2)$ , where  $R_{AB}^2$  is the R-  
39 293 squared value from a regression model that includes the variable of interest as well as all the  
40 294 covariates used in the model, and  $R_A^2$  is the R-squared value from the regression model that  
41 295 includes only the covariates.<sup>46,47</sup> For binary variables, Cohen's f-squared effect sizes were  
42  
43 296 produced after estimating first the Cohen's d using the formula:  $f^2 = \frac{d}{2k}$ , where k is the  
44  
45 297 number of groups. As a measure of dispersion, Cohen's d used the average root mean-square  
46  
47 298 error over the MI datasets. Adjusted R-squared values after MI were extracted after  
48  
49 299 estimating the model with the user-written 'mibeta' command with the 'fisherz' option,<sup>48</sup>  
50  
51 300 which calculates R-squared measures for linear regression with MI data. The significance of  
52  
53 301 the joint effect of the categorical variable parity was assessed using 'mi test' which performs  
54  
55 302 Wald tests of composite linear hypotheses.

56  
57  
58  
59  
60 303

1  
2  
3 304 *Primary outcome measures* were children's total CBCL raw score and Q-CHAT score.  
4  
5 305 *Secondary outcome measures* were CBCL internalising and externalising scores. The effect  
6  
7 306 of maternal EPDS score was adjusted for IMD rank, maternal age, maternal BMI, maternal  
8  
9 307 parity, pregnancy size, and the following child's variables: continuous gestational age, birth  
10  
11 308 weight, Bayley-III cognitive composite score, and corrected age at assessment. The  
12  
13 309 interaction between preterm birth and maternal depressive symptoms was explored using a  
14  
15 310 complete case analysis in both CBCL and Q-CHAT models, using a dichotomised measure of  
16  
17 311 gestational age. EPDS, CBCL and Q-CHAT scores were compared between term ( $\geq 37$  weeks  
18  
19 312 gestation) and preterm infants ( $< 37$  weeks gestation) using the complete case dataset. Our  
20  
21 313 regressions were thus run twice: with and without the interaction term.  
22  
23 314

24  
25 315 As all mothers had their EPDS score measured near term (or term-corrected in the case of  
26  
27 316 mothers of preterm infants), we further investigated the association between time elapsing  
28  
29 317 between baby's birth and mother's EPDS assessment and EPDS score, in order to avoid  
30  
31 318 erroneously identifying 'baby blues' in mothers of term-born infants versus postnatal  
32  
33 319 depression in mothers of preterm infants. This post-hoc analysis was performed using  
34  
35 320 Poisson regression.  
36  
37 321

### 322 Patient and Public Involvement

36 323 The current study was developed in consultation with the Weston Programme for Family  
37  
38 324 Centered Research, which involves parents to define what research is valuable to them, and to  
39  
40 325 allow them to lead it with support from the scientists in the Centre for the Developing Brain.  
41  
42 326

## 43 **Results**

### 44 Descriptive statistics

45 328 Our sample of 509 toddlers were followed up at a median corrected age of 18.4 months  
46  
47 329 (range 17.3 – 24.3 months). 51 (10.0%) of these were twins, and 3 (0.59%) were triplets. Of  
48  
49 330 the 509, 21 (4.13%) mothers scored above a clinical cut-off ( $\geq 13$ ) on the EPDS; (26) the  
50  
51 331 distribution of maternal EPDS scores is shown graphically in Supplementary Figure 1.  
52  
53 332 Demographic data are shown in Table 1. Complete data were available for 400 (78.6%)  
54  
55 333 participants. Missing data were imputed and thus all 509 subjects were included in the  
56  
57 334 primary and secondary analyses. One participant was excluded from the cognition analysis  
58  
59 335 after examining the quintiles of the residuals against the theoretical quintiles of a normal  
60  
336 distribution. The mean CBCL T score was 46.9 (SD 9.5) (Table 1); using CBCL-specified  
337

1  
2  
3 338 cut-offs,<sup>39</sup> 449 (90.2%) of participants had a CBCL score in the normal range, 30 (6.0%)  
4  
5 339 were borderline, and 19 (3.8%) scored in the clinical range. The mean Q-CHAT score was  
6  
7 340 30.5 (SD 9.3) (Table 1). The mean Bayley III Cognitive Composite score in our sample was  
8  
9 341 100 (SD 11.4) (Table 1), which corresponds to the standardised test mean;<sup>42</sup> 480 (94.3%) of  
10  
11 342 participants had a normal cognitive score, 24 (4.7%) had mild impairment, 5 (1%) had  
12  
13 343 moderate impairment, and nil had severe impairment. This distribution is not dissimilar from  
14  
15 344 that of the normative sample.<sup>42</sup>

15 345

#### 17 346 Association between maternal EPDS score and toddler CBCL and Q-CHAT scores

18  
19 347 Predictors of children's CBCL and Q-CHAT scores after multiple imputation are shown in  
20  
21 348 Table 2. Higher maternal EPDS score was associated with children's higher CBCL Total  
22  
23 349 score (B=0.93, 95% CI 0.43-1.44, p<0.001, f<sup>2</sup>=0.05) and Q-CHAT score (B=0.27, 95% CI  
24  
25 350 0.03-0.52, p=.031, f<sup>2</sup>=0.01) (Table 2). These associations are presented graphically in Figure  
26  
27 351 1 and Figure 2, respectively. Boys had higher CBCL and Q-CHAT scores than girls. Higher  
28  
29 352 Q-CHAT scores were associated with lower IMD rank (i.e., greater socio-economic  
30  
31 353 deprivation) and lower Bayley-III cognitive composite scores. Parity was not a significant  
32  
33 354 predictor of outcome in any of the models (Table 2).

33 355

34 356 Maternal EPDS score did not disproportionately affect preterm children with respect to  
35  
36 357 CBCL or Q-CHAT scores (Table 3).

37 358

#### 39 359 Association between maternal EPDS score and toddler CBCL internalising and externalising scores

41 360  
42  
43 361 Higher maternal EPDS score was associated with both internalising (B=0.22, 95% CI 0.08-  
44  
45 362 0.36, p<0.01, f<sup>2</sup>=0.03) and externalising (B=0.40, 95% CI 0.20-0.61, p<0.001, f<sup>2</sup>=0.05)  
46  
47 363 symptoms in children (Supplementary Table 1 and 2, respectively). Comparison of the  
48  
49 364 imputed model analyses to the complete-case analyses showed that results were consistent for  
50  
51 365 the CBCL model (Supplementary Table 3). Comparison for the Q-CHAT model showed that  
52  
53 366 maternal EPDS was a significant predictor in the imputed model, but not in the complete-case  
54  
55 367 analysis (Supplementary Table 3).

55 368

#### 57 369 Effect of time-lag between baby's birth and mother's EPDS assessment and EPDS score

58  
59 370 Mothers who gave birth prematurely (<37 weeks gestation) had their EPDS score assessed on  
60  
371 average 7.7 weeks later post-delivery than mothers who gave birth at term (preterm



1  
2  
3 372 participants  $M=8.9$  (SD 4.8), term participants  $M=1.2$  (SD 1.3);  $t(99.4)=15.5$ ,  $p<.001$ ). The  
4  
5 373 time-lag between birth and EPDS assessment did not predict maternal EPDS score, and there  
6  
7 374 was no evidence of a significant interaction between gestation and birth-to-assessment time-  
8  
9 375 lag (Supplementary Table 4 and 5, respectively).

376

## 377 **Discussion**

### 378 **Principal findings**

379 Our results showed that more maternal self-reported depressive symptoms shortly after birth  
380 were associated with greater parent-reported toddlers' behavioural problems. Given that  
381 fewer than 5% of the mothers in our cohort had EPDS scores above a clinical threshold,<sup>37</sup> our  
382 findings indicate that even subclinical depressive symptoms – i.e. not only diagnostic  
383 postnatal depression – adversely impact children's behavioural outcomes. In addition, our  
384 cohort was typically developing with few CBCL scores reaching a concerning threshold; our  
385 results could be interpreted within the conceptual framework of mental illness lying on a  
386 continuum with typical behavioural traits.<sup>49</sup> Our findings further showed that preterm birth  
387 did not influence the association between self-reported maternal depressive symptoms and  
388 parent-reported infants' behavioural outcomes in toddlerhood. This indicates that in this  
389 context preterm birth may not be regarded as a vulnerability or plasticity factor. Interestingly,  
390 mothers of preterm infants did not report more depressive symptoms compared to mothers of  
391 term infants in this study.

392

### 393 **Comparison to prior literature**

394 Our results with respect to internalising and externalising symptoms are in line with previous  
395 studies, including large population cohort studies, that showed an association between  
396 postnatal maternal depression and young children's emotional and behavioural problems.<sup>11</sup>  
397 Another previous study in 18-month old toddlers found that maternal depression was  
398 associated with internalising and dysregulated behaviour, but not externalising symptoms.<sup>50</sup>  
399 This difference between our and Conroy et al.'s findings may have arisen from their  
400 exclusion of infants born <36 weeks and their use of a clinical diagnosis of depression for  
401 mothers, rather than the continuous self-reported approach we employed. Interestingly, our  
402 finding that even subclinical depressive symptoms may adversely impact parent-reported  
403 child behavioural outcomes is in line with recent data showing that low- as well as high-level  
404 depressive symptoms are associated with internalising and externalising symptoms in  
405 children aged 3 years.<sup>51</sup>

406

The results showing an association between maternal postnatal depressive symptoms and the Q-CHAT are less robust and need to be interpreted with caution. Firstly, these results must be viewed in the context of the Q-CHAT having a low positive predictive value for autism, with the measure perhaps being more reflective of developmental immaturity.<sup>41</sup> Although some prior studies have shown an association between antenatal maternal depression and offspring's ASD,<sup>10,52</sup> and postnatal depression has been suggested as a potential focus of cross-domain studies of ASD,<sup>53</sup> there is no clear aetiological role of maternal postnatal depression in the development of ASD *per se*. Also, given that mothers with ASD are more likely to suffer from perinatal depression than mothers without ASD,<sup>54</sup> and ASD is highly heritable,<sup>55</sup> maternal depression may actually be a confounding rather than causative factor in our observed results. Overall, therefore, our findings with respect to the Q-CHAT do not provide support for a role of maternal depression in the aetiology of autism traits, but rather suggest that maternal depression can influence toddler behaviour.

420

The finding that preterm infants were not disproportionately affected by maternal depressive symptoms supports Hadfield et al.'s findings that maternal distress at 9 months did not differentially impact very preterm (<34 weeks) or late preterm (34-36<sup>+6</sup> weeks) infants with respect to socioemotional outcomes, although paternal distress did have an impact on very preterm infants' outcomes.<sup>24</sup> However, our results differ from Gueron-Sela et al.'s finding that very preterm (28-33 weeks) 12 month old infants' social outcomes were more influenced by maternal emotional distress at 6 months than term infants' outcomes.<sup>23</sup> The inconsistent findings may be due to methodological differences: for instance, our infant assessment being conducted at 18 months corrected age when social competency is more developed, our assessment of maternal depressive symptoms being in the very early postnatal period, or our use of the CBCL and Q-CHAT tools as markers of toddler behaviour. Importantly, the lack of support for a diathesis-stress or differential susceptibility model of maternal mental state on preterm infants in our study must be viewed in the context of our results also showing no difference in CBCL and Q-CHAT scores between term and preterm infants. This is in contrast to the existing literature that preterm infants are more likely than term infants to develop behavioural problems, such as ADHD, in childhood and adolescence.<sup>20,33</sup> It is possible that the phenotypes of neurodevelopmental and neuropsychiatric disorders assessed with the chosen behavioural measures may not be sufficiently expressed at 18 months

1  
2  
3 439 corrected age.<sup>56</sup> In addition, as briefly discussed above, much of the existing literature  
4 440 emphasises the risk of extreme (<28 weeks) or very preterm (28-33 weeks) birth on later  
5 441 behavioural outcomes,<sup>20,33</sup> whereas only 3.5% and 5.5% of our participants fell within the  
6 442 extreme and very preterm group, respectively, and we thus may not have the power to show  
7 443 any subtle effects.  
8  
9

### 11 444 12 13 **Strengths & limitations of the study** 14

15 446 The strengths of this study lie primarily in its large sample and prospective data collection.  
16 447 Moreover, the use of multiple imputation methodology has facilitated retention of a complete  
17 448 dataset, thus minimising non-response bias and increasing parameter precision. A strength in  
18 449 comparison to prior population cohort studies is that we assessed very early maternal  
19 450 depressive symptoms, and our sample is perhaps more representative of today's society –  
20 451 with increasing maternal age – than large cohort studies conducted in the 1990s-2000s. Given  
21 452 the complex interplay of biological and environmental factors in the aetiology of behavioural  
22 453 disorders, the inclusion of a substantive proportion of preterm infants in our cohort also offers  
23 454 an important insight into the role of preterm birth in behavioural outcomes; moreover, our  
24 455 results represent the full gestational spectrum, rather than discrete gestational categories. In  
25 456 addition, using maternal depressive symptoms as a continuous, rather than dichotomous,  
26 457 variable allows a more nuanced understanding of the role maternal postnatal depressive  
27 458 symptoms may play in influencing children's outcomes.  
28  
29  
30  
31  
32  
33  
34  
35  
36  
37  
38

39 460 There are several limitations to this study that necessitate our findings to be considered with  
40 461 caution. Firstly, differences in birth-to-EPDS-assessment time-lags are a potential  
41 462 confounder, given the time-sensitive nature of early-onset temporary baby blues and later-  
42 463 onset pathological postnatal depression. Mothers of infants born at term were assessed early  
43 464 post-delivery, within the period one would anticipate baby blues to present, whereas mothers  
44 465 of preterm participants were on average assessed later, when postnatal depression  
45 466 predominates.<sup>1,57</sup> Although our post-hoc analyses showed that the time elapsed from birth to  
46 467 EPDS assessment was not associated with maternal EPDS score, providing reassurance that  
47 468 our assessments of mothers of term-born infants were not inflated by the common temporary  
48 469 symptoms of baby blues, it is possible that we did not capture the full extent of later-onset  
49 470 depressive symptoms in mothers of term-born infants. This may explain why maternal EPDS  
50 471 scores did not differ between preterm and term groups in our complete dataset analysis,  
51 472 contrary to the current literature,<sup>31</sup> as well as why our rate of postpartum depression, using an

1  
2  
3 473 EPDS cut-off of 13, was low (4.1%) compared to the previously documented UK community  
4  
5 474 prevalence rate of 8.9% at eight weeks postpartum.<sup>58</sup> Our results must therefore be  
6  
7 475 interpreted with some caution.  
8  
9 476

10 477 Secondly, although statistical techniques were used to impute missing data and mitigate this  
11  
12 478 problem, 14.3% of maternal EPDS scores were missing. This rate of missingness may relate  
13  
14 479 to some mothers being reluctant to complete a questionnaire at the time their child is having  
15  
16 480 an MRI, or due to simultaneous childcare duties. Thirdly, a number of important confounders  
17  
18 481 that are likely to affect children's behavioural outcomes were not assessed in this study,  
19  
20 482 including genetic risk for psychiatric disorders,<sup>59</sup> parental psychiatric co-morbidities,<sup>50</sup>  
21  
22 483 chronicity of postnatal depressive symptoms,<sup>51</sup> antenatal maternal depression, paternal  
23  
24 484 depression and subsequent parent-infant attachment, and inter-parental conflict.<sup>11</sup> Thus, we  
25  
26 485 are unable to conclude whether our observed associations between early postnatal maternal  
27  
28 486 depressive symptoms and children's behavioural outcomes are moderated or mediated by  
29  
30 487 other parental and/or psychiatric factors.  
31  
32 488

33 489 Fourthly, whilst our study included a reasonable proportion of preterm infants (97/509, 19%),  
34  
35 490 our sample was not random, as preterm children were selectively recruited for the DHCP;  
36  
37 491 indeed, preterm infants are over-represented in our sample when compared to the UK  
38  
39 492 population incidence (7.3%),<sup>60</sup> which may limit the study's generalisability to the general  
40  
41 493 population. This over-representation of preterm infants may explain why our mean maternal  
42  
43 494 age is higher than the national mean age of 30.7,<sup>61</sup> given that increasing maternal age is  
44  
45 495 associated with increased risk of adverse pregnancy outcomes.<sup>62</sup> Our observed large maternal  
46  
47 496 age range in itself also poses a limitation on the generalisability of our findings to the general  
48  
49 497 population, and further research would be necessary to identify a possible moderation effect  
50  
51 498 of high maternal age on both EPDS scores and child behavioural outcomes. Furthermore,  
52  
53 499 although a 19% prevalence of preterm birth is high for a community sample, the proportion  
54  
55 500 of very and extreme preterm infants in our sample is small, and this may not have provided  
56  
57 501 sufficient power to detect any differential susceptibility effect of preterm birth on outcomes.  
58  
59 502

60 503 Sixthly, the effect sizes of the association between maternal EPDS score and behavioural  
61  
62 504 problems were small; this raises questions regarding the clinical significance of our findings  
63  
64 505 and potentially explains some of the inconsistency between this and previous studies. Even  
65  
66 506 within our analyses, the association between maternal depressive symptoms and Q-CHAT

1  
2  
3 507 scores was not observed in our complete case analysis, thus calling into question the validity  
4  
5 508 of this result. It is also important to highlight again the poor positive predictive value of the  
6  
7 509 Q-CHAT for autism;<sup>41</sup> higher Q-CHAT scores do not imply a diagnosis of ASD, and this  
8  
9 510 distinction may also explain the contrast to previous studies.

10 511  
11  
12 512 Finally, it is well documented that maternal depression influences reporting of Q-CHAT <sup>63</sup>  
13  
14 513 and CBCL scores.<sup>64</sup> Our study used maternal report of maternal depressive symptoms, and  
15  
16 514 our outcome measures were parent-completed questionnaires; despite the CBCL showing  
17  
18 515 good cross-informant agreement,<sup>39</sup> it is thus possible that reporting bias with common  
19  
20 516 method variance could have skewed our results.

21 517

### 22 518 **Implications of our findings**

23  
24 519 Of greatest importance to clinicians and policymakers is our finding that even *subclinical*  
25  
26 520 self-reported maternal depressive symptoms are associated with parent-reported behavioural  
27  
28 521 outcomes of offspring. This has significant implications for the risk-stratification of women  
29  
30 522 and their babies in the postnatal period, during which contact with medical professionals is  
31  
32 523 already established. Identifying high risk families and providing appropriate supportive  
33  
34 524 measures at the early postnatal stage may help to prevent future psychiatric morbidity.

35 525

### 36 526 **Future research**

37  
38 527 Further follow-up of large cohorts of preterm and term infants, to an age when behavioural  
39  
40 528 phenotypes may become more pronounced, is needed to investigate whether the long-term  
41  
42 529 developmental trajectories of term and ex-preterm infants are differentially susceptible to  
43  
44 530 changes of postnatal maternal mental health. Future research should consider both maternal  
45  
46 531 and paternal mental health, as well as socioeconomic and environmental factors on child  
47  
48 532 outcomes. Such follow-up should use independent, objective assessments of child  
49  
50 533 behavioural outcomes in order to avoid the common method variance inherent to parent-  
51  
52 534 reported measures. Finally, it is crucial for future research to elucidate the interplay of  
53  
54 535 biochemical and neurodevelopmental changes that may mediate and confound the translation  
55  
56 536 of environmental exposures into distal behavioural phenotypes.

57 537

### 58 538 **Conclusion**

59 539 This prospective longitudinal cohort study found no evidence to support the concept of  
60 540 preterm birth as a vulnerability or plasticity factor with respect to the effect of maternal

1  
2  
3 541 depressive symptoms on behavioural development. However, we showed that early  
4 542 subclinical maternal postnatal depressive symptoms were associated with behavioural  
5 543 problems in children on parent-reported measures. This adds to the increasing body of  
6 544 literature indicating the role of subclinical and early postnatal depressive symptoms in the  
7 545 aetiology of childhood behavioural disorders. These findings are of great relevance to child  
8 546 and public health, and further research may strengthen its implications for developing  
9 547 strategies to facilitate effective screening and support for women and children, enabling all to  
10 548 reach their full potential.  
11  
12  
13  
14  
15  
16  
17  
18

### 19 **Contributorship & acknowledgements**

20 551 We thank all DHCP investigators for their contribution to the study. We thank Dr Oliver  
21 552 Gale-Grant MRes (Centre for the Developing Brain, King's College London; Department of  
22 553 Forensic & Neurodevelopmental Sciences, King's College London) for providing the IMD  
23 554 rank data. We are very grateful to the families who generously took part in this research.  
24  
25  
26  
27  
28

29 556 **Conceptualization:** SC, ADE, CN; **Methodology:** IK, GV, SC, AP, ADE, CN;  
30 557 **Investigation:** SF, AC; **Data curation:** IK, AL; **Formal analysis:** IK, GV, AP, CN;  
31 558 **Writing – original draft preparation:** IK; **Writing – Review & Editing:** GV, AL, SF, AC,  
32 559 SC, AP, ADE, CN; **Visualisation:** IK, GV; **Funding acquisition:** SC, ADE; **Supervision:**  
33 560 AP, ADE, CN.  
34  
35  
36  
37  
38

### 39 **Funding statement**

40 562  
41 563 The DHCP project was funded by the European Research Council under the European Union  
42 564 Seventh Framework Programme (FR/2007-2013)/ERC Grant Agreement no. 319456. The  
43 565 authors acknowledge infrastructure support from the National Institute for Health Research  
44 566 Mental Health Biomedical Research Centre at South London, Maudsley NHS Foundation  
45 567 Trust, King's College London, the National Institute for Health Research Mental Health  
46 568 Biomedical Research Centre at Guys, and St Thomas' Hospitals NHS Foundation Trust. The  
47 569 study was also supported in part by the Engineering and Physical Sciences Research Council  
48 570 / Wellcome Trust Centre for Medical Engineering at King's College London (grant WT  
49 571 203148/Z/16/Z) and the Medical Research Council (UK) (grants MR/K006355/1 and  
50 572 MR/L011530/1) and the MRC Centre for Neurodevelopmental Disorders at King's College  
51 573 London. AP receives a NIHR SI award (NF-SI-0617-10120). AL is supported by the UK  
52 574 Medical Research Council (MR/N013700) and King's College London member of the MRC  
53  
54  
55  
56  
57  
58  
59  
60

1  
2  
3 575 Doctoral Training Partnership in Biomedical Sciences. The views expressed are those of the  
4  
5 576 authors and not necessarily those of the NHS, the NIHR, or the Department of Health and  
6  
7 577 Social Care.  
8  
9 578

10 579 **Conflict of interest / Competing interests**

11 580 ADE received financial support from the EU-AIMS-Trials (European Research Council  
12  
13 581 under the European Union Seventh Framework Programme) as co-Principal Investigator.  
14  
15 582 ADE received consulting fees from Chiesi Farmaceutici (advice on neuroprotection in  
16  
17 583 newborn infants) and Medtronix (unpaid participation in scientific advice committee). ADE  
18  
19 584 has a patent on Xenon as an organ protectant (No P023708WO). ADE was Chair of the Data  
20  
21 585 Monitoring and Ethics Committee for the Baby-Oscar Trial, and served on the Data  
22  
23 586 Monitoring and Ethics Committee for the PAEN Trial.  
24  
25 587

26 588 There are no other relationships or activities that could appear to have influenced the  
27  
28 589 submitted work.  
29  
30 590

31 591 **Ethics approval**

32 592 This study was approved by the UK National Research Ethics Authority (14/LO/1169) and  
33  
34 593 conducted in accordance with the World Medical Association's Code of Ethics (Declaration  
35  
36 594 of Helsinki).  
37  
38 595

39 596 **Consent to participate**

40  
41 597 Written informed consent was given by children's carer(s) at recruitment into the study.  
42  
43 598

44 599 **Consent for publication**

45  
46 600 Not applicable.  
47  
48 601

49 602 **Data sharing**

50  
51 603 Research data are available upon reasonable request.  
52  
53 604

54 605 **Code availability**

55  
56 606 Not applicable.  
57  
58 607  
59  
60 608

609 **References**

- 610 1. Woody CA, Ferrari AJ, Siskind DJ, Whiteford HA, Harris MG. A systematic review and meta-  
611 regression of the prevalence and incidence of perinatal depression. *J Affect Disord.*  
612 2017;219:86-92. doi:10.1016/j.jad.2017.05.003
- 613 2. Rezaie-Keikhaie K, Arbabshastan ME, Rafiemanesh H, Amirshahi M, Ostadkelayeh SM,  
614 Arbabisarjou A. Systematic Review and Meta-Analysis of the Prevalence of the Maternity Blues  
615 in the Postpartum Period. *J Obstet Gynecol Neonatal Nurs.* 2020;49(2):127-136.  
616 doi:10.1016/j.jogn.2020.01.001
- 617 3. Beck CT. Predictors of postpartum depression: an update. *Nurs Res.* 2001;50(5):275-285.
- 618 4. de Paula Eduardo JAF, de Rezende MG, Menezes PR, Del-Ben CM. Preterm birth as a risk  
619 factor for postpartum depression: A systematic review and meta-analysis. *J Affect Disord.*  
620 2019;259:392-403. doi:10.1016/j.jad.2019.08.069
- 621 5. Blom EA, Jansen PW, Verhulst FC, et al. Perinatal complications increase the risk of  
622 postpartum depression. The Generation R Study. *BJOG Int J Obstet Gynaecol.*  
623 2010;117(11):1390-1398. doi:10.1111/j.1471-0528.2010.02660.x
- 624 6. Beck CT. Postpartum depression: a metasynthesis. *Qual Health Res.* 2002;12(4):453-472.  
625 doi:10.1177/104973202129120016
- 626 7. Grace SL, Evindar A, Stewart DE. The effect of postpartum depression on child cognitive  
627 development and behavior: a review and critical analysis of the literature. *Arch Womens Ment*  
628 *Health.* 2003;6(4):263-274. doi:10.1007/s00737-003-0024-6
- 629 8. Lebel C, Walton M, Letourneau N, Giesbrecht GF, Kaplan BJ, Dewey D. Prepartum and  
630 postpartum maternal depressive symptoms are related to children's brain structure in preschool.  
631 *Biol Psychiatry.* 2016;80(11):859-868. doi:10.1016/j.biopsych.2015.12.004
- 632 9. Goodman SH, Rouse MH, Connell AM, Broth MR, Hall CM, Heyward D. Maternal depression  
633 and child psychopathology: a meta-analytic review. *Clin Child Fam Psychol Rev.* 2011;14(1):1-  
634 27. doi:10.1007/s10567-010-0080-1
- 635 10. Hagberg KW, Robijn AL, Jick S. Maternal depression and antidepressant use during pregnancy  
636 and the risk of autism spectrum disorder in offspring. *Clin Epidemiol.* 2018;10:1599-1612.  
637 doi:10.2147/CLEP.S180618
- 638 11. Stein A, Pearson RM, Goodman SH, et al. Effects of perinatal mental disorders on the fetus and  
639 child. *The Lancet.* 2014;384(9956):1800-1819. doi:10.1016/S0140-6736(14)61277-0
- 640 12. Van Batenburg-Eddes T, Brion MJ, Henrichs J, et al. Parental depressive and anxiety symptoms  
641 during pregnancy and attention problems in children: a cross-cohort consistency study. *J Child*  
642 *Psychol Psychiatry.* 2013;54(5):591-600. doi:10.1111/jcpp.12023
- 643 13. Barker ED, Jaffee SR, Uher R, Maughan B. The contribution of prenatal and postnatal maternal  
644 anxiety and depression to child maladjustment. *Depress Anxiety.* 2011;28(8):696-702.  
645 doi:10.1002/da.20856
- 646 14. Pearson RM, Evans J, Kounali D, et al. Maternal depression during pregnancy and the postnatal  
647 period: risks and possible mechanisms for offspring depression at 18 years. *JAMA Psychiatry.*  
648 2013;70(12):1312-1319. doi:10.1001/jamapsychiatry.2013.2163



- 1  
2  
3 649 15. Kleine I, Falconer S, Roth S, et al. Early postnatal maternal trait anxiety is associated with the  
4 650 behavioural outcomes of children born preterm <33 weeks. *J Psychiatr Res.* 2020;131:160-168.  
5 651 doi:10.1016/j.jpsychires.2020.09.010  
6  
7 652 16. Feder A, Nestler EJ, Charney DS. Psychobiology and molecular genetics of resilience. *Nat Rev*  
8 653 *Neurosci.* 2009;10(6):446-457. doi:10.1038/nrn2649  
9  
10 654 17. World Health Organization. Preterm birth. Published February 19, 2018. Accessed May 18,  
11 655 2022. <https://www.who.int/news-room/fact-sheets/detail/preterm-birth>  
12  
13 656 18. Dimitrova R, Pietsch M, Christiaens D, et al. Heterogeneity in brain microstructural  
14 657 development following preterm birth. *Cereb Cortex.* 2020;30(9):4800-4810.  
15 658 doi:10.1093/cercor/bhaa069  
16  
17 659 19. Fitzallen GC, Sagar YK, Taylor HG, Bora S. Anxiety and depressive disorders in children born  
18 660 preterm: a meta-analysis. *J Dev Behav Pediatr JDBP.* 2021;42(2):154-162.  
19 661 doi:10.1097/DBP.0000000000000898  
20  
21 662 20. Allotey J, Zamora J, Cheong-See F, et al. Cognitive, motor, behavioural and academic  
22 663 performances of children born preterm: a meta-analysis and systematic review involving 64 061  
23 664 children. *BJOG Int J Obstet Gynaecol.* 2018;125(1):16-25. doi:10.1111/1471-0528.14832  
24  
25 665 21. Jaekel J, Pluess M, Belsky J, Wolke D. Effects of maternal sensitivity on low birth weight  
26 666 children's academic achievement: a test of differential susceptibility versus diathesis stress. *J*  
27 667 *Child Psychol Psychiatry.* 2015;56(6):693-701. doi:10.1111/jcpp.12331  
28  
29 668 22. Belsky J, Bakermans-Kranenburg MJ, van IJzendoorn MH. For better and for worse: differential  
30 669 susceptibility to environmental influences. *Curr Dir Psychol Sci.* 2007;16(6):300-304.  
31 670 doi:10.1111/j.1467-8721.2007.00525.x  
32  
33 671 23. Gueron-Sela N, Atzaba-Poria N, Meiri G, Marks K. The caregiving environment and  
34 672 developmental outcomes of preterm infants: diathesis stress or differential susceptibility effects?  
35 673 *Child Dev.* 2015;86(4):1014-1030. doi:<https://doi.org/10.1111/cdev.12359>  
36  
37 674 24. Hadfield K, O'Brien F, Gerow A. Is level of prematurity a risk/plasticity factor at three years of  
38 675 age? *Infant Behav Dev.* 2017;47:27-39. doi:10.1016/j.infbeh.2017.03.003  
39  
40 676 25. Belsky J, Pluess M. Beyond diathesis stress: differential susceptibility to environmental  
41 677 influences. *Psychol Bull.* 2009;135(6):885-908. doi:10.1037/a0017376  
42  
43 678 26. Pluess M, Belsky J. Prenatal programming of postnatal plasticity? *Dev Psychopathol.*  
44 679 2011;23(1):29-38. doi:10.1017/S0954579410000623  
45  
46 680 27. DeMaster D, Bick J, Johnson U, Montroy JJ, Landry S, Duncan AF. Nurturing the preterm  
47 681 infant brain: leveraging neuroplasticity to improve neurobehavioral outcomes. *Pediatr Res.*  
48 682 2019;85(2):166-175. doi:10.1038/s41390-018-0203-9  
49  
50 683 28. World Health Organization (WHO). Global nutrition targets 2025: low birth weight policy brief.  
51 684 Published online 2014.  
52  
53 685 29. Kramer MS. Determinants of low birth weight: methodological assessment and meta-analysis.  
54 686 *Bull World Health Organ.* 1987;65(5):663-737.  
55  
56 687 30. Goldenberg RL, Culhane JF, Iams JD, Romero R. Epidemiology and causes of preterm birth.  
57 688 *Lancet Lond Engl.* 2008;371(9606):75-84. doi:10.1016/S0140-6736(08)60074-4  
58  
59  
60

- 1  
2  
3 689 31. Carson C, Redshaw M, Gray R, Quigley MA. Risk of psychological distress in parents of  
4 690 preterm children in the first year: evidence from the UK Millennium Cohort Study. *BMJ Open*.  
5 691 2015;5(12):e007942. doi:10.1136/bmjopen-2015-007942
- 6  
7 692 32. Vigod SN, Villegas L, Dennis CL, Ross LE. Prevalence and risk factors for postpartum  
8 693 depression among women with preterm and low-birth-weight infants: a systematic review.  
9 694 *BJOG Int J Obstet Gynaecol*. 2010;117(5):540-550. doi:10.1111/j.1471-0528.2009.02493.x
- 10  
11 695 33. Johnson S, Wolke D. Behavioural outcomes and psychopathology during adolescence. *Early*  
12 696 *Hum Dev*. 2013;89(4):199-207. doi:10.1016/j.earlhumdev.2013.01.014
- 13  
14 697 34. Lautarescu A, Victor S, Lau-Zhu A, Counsell SJ, Edwards AD, Craig MC. The factor structure  
15 698 of the Edinburgh Postnatal Depression Scale among perinatal high-risk and community samples  
16 699 in London. *Arch Womens Ment Health*. 2022;25(1):157-169. doi:10.1007/s00737-021-01153-0
- 17  
18 700 35. Ministry of Housing, Communities & Local Government. The English indices of deprivation  
19 701 2019. Published online 2019.  
20 702 [https://assets.publishing.service.gov.uk/government/uploads/system/uploads/attachment\\_data/file/835115/loD2019\\_Statistical\\_Release.pdf](https://assets.publishing.service.gov.uk/government/uploads/system/uploads/attachment_data/file/835115/loD2019_Statistical_Release.pdf)  
21 703
- 22  
23 704 36. Boyd A, Golding J, Macleod J, et al. Cohort Profile: The ‘Children of the 90s’—the index  
24 705 offspring of the Avon Longitudinal Study of Parents and Children. *Int J Epidemiol*.  
25 706 2013;42(1):111-127. doi:10.1093/ije/dys064
- 26  
27 707 37. Cox JL, Holden JM, Sagovsky R. Detection of postnatal depression: development of the 10-item  
28 708 Edinburgh Postnatal Depression Scale. *Br J Psychiatry*. 1987;150(6):782-786.  
29 709 doi:10.1192/bjp.150.6.782
- 30  
31 710 38. Levis B, Negeri Z, Sun Y, Benedetti A, Thombs BD. Accuracy of the Edinburgh Postnatal  
32 711 Depression Scale (EPDS) for screening to detect major depression among pregnant and  
33 712 postpartum women: systematic review and meta-analysis of individual participant data. *BMJ*.  
34 713 2020;371. doi:10.1136/bmj.m4022
- 35  
36 714 39. Achenbach TM, Rescorla LA. *Manual for the ASEBA Preschool Forms & Profiles.*; 2000.
- 37  
38 715 40. Allison C, Baron-Cohen S, Wheelwright S, et al. The Q-CHAT (Quantitative Checklist for  
39 716 Autism in Toddlers): a normally distributed quantitative measure of autistic traits at 18-24  
40 717 months of age: preliminary report. *J Autism Dev Disord*. 2008;38(8):1414-1425.  
41 718 doi:10.1007/s10803-007-0509-7
- 42  
43 719 41. Allison C, Matthews FE, Ruta L, et al. Quantitative Checklist for Autism in Toddlers (Q-  
44 720 CHAT). A population screening study with follow-up: the case for multiple time-point  
45 721 screening for autism. *BMJ Paediatr Open*. 2021;5(1):e000700. doi:10.1136/bmjpo-2020-000700
- 46  
47 722 42. Bayley N. *Bayley Scales of Infant and Toddler Development - Third Edition*. 3rd ed. Harcourt  
48 723 Assessment; 2006.
- 49  
50 724 43. Albers CA, Grieve AJ. Review of Bayley scales of infant and toddler development-third edition.  
51 725 *J Psychoeduc Assess*. 2007;25(2):180-190. doi:10.1177/0734282906297199
- 52  
53 726 44. Anderson PJ, De Luca CR, Hutchinson E, Roberts G, Doyle LW, the Victorian Infant  
54 727 Collaborative Group. Underestimation of developmental delay by the new Bayley-III scale.  
55 728 *Arch Pediatr Adolesc Med*. 2010;164(4):352-356. doi:10.1001/archpediatrics.2010.20
- 56  
57 729 45. Rubin DB. Inference and missing data. *Biometrika*. 1976;63(3):581-592. doi:10.2307/2335739  
58  
59  
60

- 1  
2  
3 730 46. Cohen J. *Statistical Power Analysis for the Behavioral Sciences*. 2nd ed. L. Erlbaum Associates;  
4 731 1988.
- 6 732 47. Selya AS, Rose JS, Dierker LC, Hedeker D, Mermelstein RJ. A practical guide to calculating  
7 733 Cohen's  $f^2$ , a measure of local effect size, from PROC MIXED. *Front Psychol*. 2012;3.  
8 734 doi:10.3389/fpsyg.2012.00111
- 10 735 48. Harel O. The estimation of R<sup>2</sup> and adjusted R<sup>2</sup> in incomplete data sets using multiple  
11 736 imputation. *J Appl Stat*. 2009;36(10):1109-1118. doi:10.1080/02664760802553000
- 13 737 49. Plomin R, Haworth CMA, Davis OSP. Common disorders are quantitative traits. *Nat Rev Genet*.  
14 738 2009;10(12):872-878. doi:10.1038/nrg2670
- 16 739 50. Conroy S, Pariante CM, Marks MN, et al. Maternal psychopathology and infant development at  
17 740 18 months: the impact of maternal personality disorder and depression. *J Am Acad Child  
18 741 Adolesc Psychiatry*. 2012;51(1):51-61. doi:10.1016/j.jaac.2011.10.007
- 21 742 51. Kingston D, Kehler H, Austin MP, et al. Trajectories of maternal depressive symptoms during  
22 743 pregnancy and the first 12 months postpartum and child externalizing and internalizing behavior  
23 744 at three years. *PLoS One*. 2018;13(4):e0195365. doi:10.1371/journal.pone.0195365
- 25 745 52. Wiggins LD, Rubenstein E, Daniels J, et al. A phenotype of childhood autism is associated with  
26 746 preexisting maternal anxiety and depression. *J Abnorm Child Psychol*. 2019;47(4):731-740.  
27 747 doi:10.1007/s10802-018-0469-8
- 29 748 53. Babb JA, Deligiannidis KM, Murgatroyd CA, Nephew BC. Peripartum depression and anxiety  
30 749 as an integrative cross-domain target for psychiatric preventative measures. *Behav Brain Res*.  
31 750 2015;0:32-44. doi:10.1016/j.bbr.2014.03.039
- 33 751 54. Pohl AL, Crockford SK, Blakemore M, Allison C, Baron-Cohen S. A comparative study of  
34 752 autistic and non-autistic women's experience of motherhood. *Mol Autism*. 2020;11(1):3.  
35 753 doi:10.1186/s13229-019-0304-2
- 37 754 55. Colvert E, Tick B, McEwen F, et al. Heritability of autism spectrum disorder in a UK  
38 755 population-based twin sample. *JAMA Psychiatry*. 2015;72(5):415-423.  
39 756 doi:10.1001/jamapsychiatry.2014.3028
- 41 757 56. Egger HL, Emde RN. Developmentally sensitive diagnostic criteria for mental health disorders  
42 758 in early childhood: the diagnostic and statistical manual of mental disorders-IV, the research  
43 759 diagnostic criteria-preschool age, and the diagnostic classification of mental health and  
44 760 developmental disorders of infancy and early childhood-revised. *Am Psychol*. 2011;66(2):95-  
45 761 106. doi:10.1037/a0021026
- 47 762 57. Henshaw C. Mood disturbance in the early puerperium: a review. *Arch Women's Ment Health*.  
48 763 2003;6(2):s33-s42. doi:10.1007/s00737-003-0004-x
- 51 764 58. Heron J, O'Connor TG, Evans J, Golding J, Glover V. The course of anxiety and depression  
52 765 through pregnancy and the postpartum in a community sample. *J Affect Disord*. 2004;80(1):65-  
53 766 73. doi:10.1016/j.jad.2003.08.004
- 55 767 59. Biel MG. Parental psychiatric symptoms and children's outcomes: toward understanding and  
56 768 responding to intergenerational risk in child psychiatry. *J Am Acad Child Adolesc Psychiatry*.  
57 769 2018;57(9):632-633. doi:10.1016/j.jaac.2018.06.010
- 59  
60

- 1  
2  
3 770 60. National Institute for Health and Care Excellence. Preterm labour and birth (NICE guideline  
4 771 25). Published online November 2015. Accessed January 27, 2019.  
5 772 <https://www.nice.org.uk/guidance/ng25>  
6  
7 773 61. Office for National Statistics. Birth characteristics in England and Wales: 2020. Published  
8 774 January 13, 2022. Accessed February 5, 2022.  
9 775 [https://www.ons.gov.uk/peoplepopulationandcommunity/birthsdeathsandmarriages/livebirths/bu](https://www.ons.gov.uk/peoplepopulationandcommunity/birthsdeathsandmarriages/livebirths/bulletins/birthcharacteristicsinenglandandwales/2020#birth-characteristics)  
10 776 [lletins/birthcharacteristicsinenglandandwales/2020#birth-characteristics](https://www.ons.gov.uk/peoplepopulationandcommunity/birthsdeathsandmarriages/livebirths/bulletins/birthcharacteristicsinenglandandwales/2020#birth-characteristics)  
11  
12 777 62. Londero AP, Rossetti E, Pittini C, Cagnacci A, Driul L. Maternal age and the risk of adverse  
13 778 pregnancy outcomes: a retrospective cohort study. *BMC Pregnancy Childbirth*. 2019;19(1):261.  
14 779 doi:10.1186/s12884-019-2400-x  
15  
16 780 63. Goh DA, Gan D, Kung J, et al. Child, maternal and demographic factors influencing caregiver-  
17 781 reported autistic trait symptomatology in toddlers. *J Autism Dev Disord*. 2018;48(4):1325-1337.  
18 782 doi:10.1007/s10803-018-3471-7  
19  
20 783 64. Friedlander S, Weiss DS, Traylor J. Assessing the influence of maternal depression on the  
21 784 validity of the Child Behavior Checklist. *J Abnorm Child Psychol*. 1986;14(1):123-133.  
22 785 doi:10.1007/bf00917228  
23  
24 786  
25  
26 787  
27  
28 788  
29  
30 789  
31  
32 790  
33  
34 791  
35  
36 792  
37  
38 793  
39  
40 794  
41  
42 795  
43  
44 796  
45  
46 797  
47  
48 798  
49  
50 799  
51  
52 800  
53  
54 801  
55  
56 802  
57  
58 803  
59  
60 804

805 **Table 1: Socio-demographic, maternal and clinical characteristics (n=509)**

| Variable                                                  | Number (%)*              |
|-----------------------------------------------------------|--------------------------|
| Sex: Male                                                 | 274 (53.8)               |
| Index of Multiple Deprivation (IMD) quintiles             |                          |
| 1 (least deprived) <sup>a</sup>                           | 65 (12.8)                |
| 2                                                         | 87 (17.2)                |
| 3                                                         | 108 (21.3)               |
| 4                                                         | 173 (34.2)               |
| 5 (most deprived)                                         | 73 (14.4)                |
| Gestational age at birth (weeks), median [range]          | 39.7 [20 – 43]           |
| Gestational category                                      |                          |
| Extremely preterm (<28 weeks)                             | 18 (3.5)                 |
| Very preterm (28-32 weeks)                                | 28 (5.5)                 |
| Late preterm (32-37 weeks)                                | 51 (10.0)                |
| Term (≥37 weeks)                                          | 412 (80.9)               |
| Birthweight (g), median [range]                           | 3290 [450 – 4750]        |
| Multiple pregnancy                                        | 54 (10.6)                |
| Maternal parity                                           |                          |
| 0                                                         | 332 (65.2)               |
| 1                                                         | 124 (24.4)               |
| 2                                                         | 32 (6.3)                 |
| 3+                                                        | 21 (4.2)                 |
| Maternal BMI (kg/m <sup>2</sup> ), median [range]         | 23.2 [15.3 – 43.6]       |
| Maternal age at infant's birth (years), mean (SD) [range] | 34.2 (4.8)<br>[17 – 52]  |
| Maternal ethnicity                                        |                          |
| White                                                     | 272 (53.4)               |
| Black/Black British                                       | 56 (11.0)                |
| Asian/Asian British                                       | 28 (5.5)                 |
| Chinese                                                   | 18 (3.5)                 |
| Mixed – White & Asian                                     | 4 (0.8)                  |
| Mixed – White & Black                                     | 4 (0.8)                  |
| Any other                                                 | 30 (5.9)                 |
| Do not wish to answer                                     | 9 (1.8)                  |
| No data                                                   | 88 (17.3)                |
| Bayley III cognitive composite score, mean (SD) [range]   | 100 (11.4)<br>[55 – 125] |
| CBCL total T score, mean (SD) [range]                     | 46.9 (9.5)<br>[28 – 69]  |
| Q-CHAT total score, mean (SD) [range]                     | 30.5 (9.3)<br>[8 – 70]   |
| EPDS score, median [range]                                | 4 [0 – 28]               |
| EPDS score, n (%)                                         |                          |
| <13                                                       | 415 (8.2)                |
| ≥13                                                       | 21 (4.1)                 |
| No data                                                   | 73 (14.3)                |

806 <sup>a</sup> Quintile 1 corresponds to the highest, least deprived, IMD rankings.

807 \* unless otherwise specified

**Table 2: CBCL and Q-CHAT model predictors using multiple imputation without interaction.** (Cf. Supplementary Table 3 for complete case analysis)

|                                             | CBCL                 |           |                | Q-CHAT               |                   |                |
|---------------------------------------------|----------------------|-----------|----------------|----------------------|-------------------|----------------|
|                                             | B [95%CI]            | p         | f <sup>2</sup> | B [95%CI]            | p                 | f <sup>2</sup> |
| <b>Maternal EPDS</b>                        | 0.93 [0.43, 1.44]    | <.001 *** | 0.05           | 0.27 [0.03, 0.52]    | .031 *            | 0.01           |
| <b>Maternal BMI</b>                         | -0.09 [-0.44, 0.26]  | .621      | -              | 0.06 [-0.13, 0.24]   | .538              | -              |
| <b>Multiple pregnancy</b>                   | 3.15 [-3.07, 9.37]   | .320      | -              | 1.33 [-2.62, 5.28]   | .509              | -              |
| <b>Parity</b>                               |                      |           |                |                      |                   |                |
| <b>1</b>                                    | -2.52 [-5.96, 0.93]  | .151      | -              | -2.14 [-4.02, -0.27] | .025 <sup>a</sup> | -              |
| <b>2</b>                                    | -3.23 [-9.16, 2.70]  | .285      | -              | 0.88 [-1.99, 3.75]   | .548              | -              |
| <b>3+</b>                                   | -1.37 [-8.36, 5.61]  | .699      | -              | -0.49 [-4.57, 3.60]  | .815              | -              |
| <b>IMD rank</b>                             | -1.48 [-3.33, 0.37]  | .117      | -              | -1.50 [-2.60, -0.40] | .008 **           | 0.02           |
| <b>Gestational age at birth (weeks)</b>     | 0.10 [-0.65, 0.85]   | .786      | -              | 0.26 [-0.17, 0.70]   | .233              | -              |
| <b>Birthweight (kg)</b>                     | 0.56 [-2.65, 3.78]   | .731      | -              | -1.24 [-2.93, 0.46]  | .151              | -              |
| <b>Sex:female</b>                           | -4.14 [-6.96, -1.31] | .004 **   | 0.06           | -1.95 [-3.42, -0.48] | .009 **           | 0.05           |
| <b>Corrected age at assessment (months)</b> | -0.90 [-2.17, 0.37]  | .166      | -              | -0.16 [-0.91, 0.59]  | .677              | -              |
| <b>Cognition</b>                            | -0.05 [-0.20, 0.09]  | .467      | -              | -0.27 [-0.35, -0.20] | <.001 ***         | 0.12           |

p<0.05 \*; p<0.01 \*\*; p<0.001 \*\*\*

CBCL model adjusted R<sup>2</sup> = 0.0676. Q-CHAT model adjusted R<sup>2</sup> = 0.193.

B = unstandardised coefficient.

CBCL = Child Behaviour Checklist score at 18 months. Q-CHAT = Quantitative Checklist for Autism in Toddlers score at 18 months. Maternal EPDS = maternal Edinburgh Postnatal Depression Scale score at term-equivalent age. Multiple pregnancy = dummy variable of twin/triplet pregnancy. Parity = dummy variable, one/two/three+ previous child(ren). Corrected age at assessment (months) = age at behavioural assessment, corrected for gestational age. Cognition = infant Bayley III score at 18 months.

<sup>a</sup> Wald test of whole parity variable in Q-CHAT model: F(3, 476.9) = 1.88, p = .133

Effect size (Cohen’s f<sup>2</sup>, calculated from squared part correlations for predictors significant to 0.05): 0.02 = small, 0.15 = medium and 0.35 = large.<sup>46</sup>

- indicates data not given, as predictor not significant to 0.05.

**Table 3: CBCL and Q-CHAT model predictors using complete case analysis with interaction of ‘EPDS x term’.**

|                                             | CBCL                 |         | Q-CHAT               |           |
|---------------------------------------------|----------------------|---------|----------------------|-----------|
|                                             | B [95%CI]            | p       | B [95%CI]            | p         |
| <b>Maternal EPDS</b>                        | 0.89 [-0.24, 2.02]   | .121    | 0.24 [-0.28, 0.75]   | .365      |
| <b>Maternal BMI</b>                         | -0.01 [-0.39, 0.37]  | .955    | 0.00 [-0.16, 0.17]   | .982      |
| <b>Multiple pregnancy</b>                   | 1.76 [-6.65, 10.17]  | .681    | 0.97 [-2.07, 4.01]   | .532      |
| <b>Parity</b>                               |                      |         |                      |           |
| <b>1</b>                                    | -2.75 [-6.49, 0.99]  | .149    | -1.42 [-3.30, 0.46]  | .139      |
| <b>2</b>                                    | -3.49 [-10.36, 3.37] | .317    | 0.16 [-2.84, 3.16]   | .917      |
| <b>3+</b>                                   | -1.17 [-9.69, 7.35]  | .788    | -1.13 [-4.24, 1.98]  | .476      |
| <b>IMD rank</b>                             | -1.41 [-3.54, 0.73]  | .195    | -1.68 [-2.64, -0.72] | .001 **   |
| <b>Gestation: term</b>                      | 1.25 [-8.34, 10.85]  | .797    | 2.64 [-1.74, 7.02]   | .236      |
| <b>Birthweight (kg)</b>                     | -1.01 [-4.08, 2.05]  | .516    | -2.25 [-3.73, -0.78] | .003 **   |
| <b>Sex: female</b>                          | -4.64 [-7.83, -1.44] | .005 ** | -2.22 [-3.72, -0.71] | .004 **   |
| <b>Corrected age at assessment (months)</b> | -0.83 [-2.27, 0.62]  | .261    | -0.39 [-1.18, 0.04]  | .335      |
| <b>Cognition</b>                            | -0.03 [-0.20, 0.14]  | .720    | -0.22 [-0.29, -0.15] | <.001 *** |
| <b>EPDS x gestation:term</b>                | -0.01 [-1.30, 1.28]  | .991    | -0.02 [-0.60, 0.56]  | .950      |

p<0.05 \*; p<0.01 \*\*; p<0.001 \*\*\*

CBCL model adjusted R<sup>2</sup> = 0.0865. Q-CHAT model adjusted R<sup>2</sup> = 0.215.

B = unstandardised coefficient.

CBCL = Child Behaviour Checklist score at 18 months. Q-CHAT = Quantitative Checklist for Autism in Toddlers score at 18 months. Maternal EPDS = maternal Edinburgh Postnatal Depression Scale score at term-equivalent age. Multiple pregnancy = dummy variable of twin/triplet pregnancy. Parity = dummy variable, one/two/three+ previous child(ren). Gestation: term = dummy variable, term (≥37 weeks) vs preterm (<37 weeks) gestation at birth.

Corrected age at assessment (months) = age at behavioural assessment, corrected for gestational age. Cognition = infant Bayley III score at 18 months. EPDS x gestation:term = interaction term between maternal EPDS score and term gestation at birth.

1  
2  
3  
4  
5  
6  
7  
8  
9  
10  
11  
12  
13  
14  
15  
16  
17  
18  
19  
20  
21  
22  
23  
24  
25  
26  
27  
28  
29  
30  
31  
32  
33  
34  
35  
36  
37  
38  
39  
40  
41  
42  
43  
44  
45  
46  
47  
48  
49  
50  
51  
52  
53  
54  
55  
56  
57  
58  
59  
60

**Fig.1** Children’s predicted CBCL scores at 18 months are positively correlated to the maternal EPDS score at term-equivalent age.

**Fig.2** Children’s predicted Q-CHAT scores at 18 months are positively correlated to the maternal EPDS score at term-equivalent age.

For peer review only





Fig.1 Children’s predicted CBCL scores at 18 months are positively correlated to the maternal EPDS score at term-equivalent age

158x158mm (220 x 220 DPI)

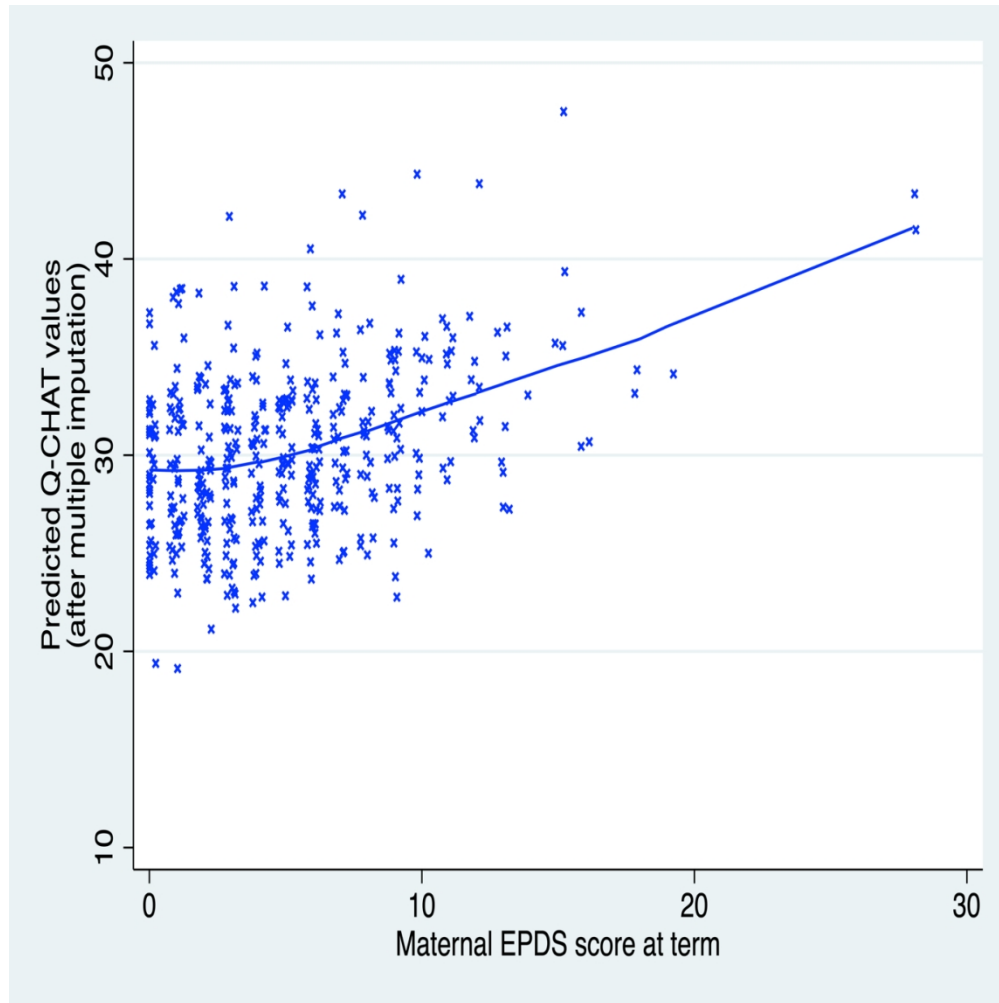

Fig.2 Children’s predicted Q-CHAT scores at 18 months are positively correlated to the maternal EPDS score at term-equivalent age.

158x158mm (220 x 220 DPI)

## **Supplemental material**

**Supplementary Table 1:** CBCL internalising symptom model predictors using multiple imputation.

**Supplementary Table 2:** CBCL externalising symptom model predictors using multiple imputation.

**Supplementary Table 3:** CBCL and Q-CHAT model predictors using complete case analysis without interaction.

**Supplementary Table 4:** EPDS score predictors.

**Supplementary Table 5:** EPDS score predictors including interaction 'term x time-lag'.

**Supplementary Figure 1:** Histogram showing the distribution of maternal EPDS scores at term-equivalent age.

**Supplementary Table 1: CBCL internalising symptom model predictors using multiple imputation.**

|                                             | <b>B [95%CI]</b>     | <b>p</b> | <b>f<sup>2</sup></b> |
|---------------------------------------------|----------------------|----------|----------------------|
| <b>Maternal EPDS</b>                        | 0.22 [0.08, 0.36]    | .003 **  | 0.03                 |
| <b>Maternal BMI</b>                         | -0.04 [-0.13, 0.06]  | .436     | -                    |
| <b>Multiple pregnancy</b>                   | 0.58 [-1.10, 2.27]   | .497     | -                    |
| <b>Parity</b>                               |                      |          |                      |
| <b>1</b>                                    | -0.37 [-1.41, 0.67]  | .487     | -                    |
| <b>2</b>                                    | -1.33 [-3.09, 0.42]  | .136     | -                    |
| <b>3+</b>                                   | 0.64 [-1.34, 2.62]   | .524     | -                    |
| <b>IMD rank</b>                             | -0.41 [-0.91, 0.10]  | .115     | -                    |
| <b>Gestational age at birth (weeks)</b>     | 0.22 [-0.00, 0.44]   | .053     | -                    |
| <b>Birthweight (kg)</b>                     | -0.97 [-1.90, -0.05] | .038 *   | 0.005                |
| <b>Sex: female</b>                          | -0.51 [-1.35, 0.33]  | .232     | -                    |
| <b>Corrected age at assessment (months)</b> | 0.02 [-0.41, 0.45]   | .923     | -                    |
| <b>Cognition</b>                            | -0.05 [-0.10, -0.01] | .016 *   | 0.01                 |

p<0.05 \*; p<0.01 \*\*; p<0.001 \*\*\*

Adjusted R<sup>2</sup> = 0.0566.

B = unstandardised coefficient.

Outcome variable = Child Behaviour Checklist internalising sub-score at 18 months. Maternal EPDS = maternal Edinburgh Postnatal Depression Scale score at term-equivalent age. Multiple pregnancy = dummy variable of twin/triplet pregnancy. Parity = dummy variable, one/two/three+ previous child(ren). Corrected age at assessment (months) = age at behavioural assessment, corrected for gestational age. Cognition = infant Bayley III score at 18 months.

Effect size (Cohen's f<sup>2</sup>, calculated from squared part correlations for predictors significant to 0.05): 0.02 = small, 0.15 = medium and 0.35 = large.<sup>1</sup>

- indicates data not given, as predictor not significant to 0.05.

**Supplementary Table 2: CBCL externalising symptom model predictors using multiple imputation.**

|                                             | <b>B [95%CI]</b>     | <b>p</b>  | <b>f<sup>2</sup></b> |
|---------------------------------------------|----------------------|-----------|----------------------|
| <b>Maternal EPDS</b>                        | 0.40 [0.20, 0.61]    | <.001 *** | 0.05                 |
| <b>Maternal BMI</b>                         | 0.01 [-0.17, 0.15]   | .933      | -                    |
| <b>Multiple pregnancy</b>                   | 2.51 [-0.29, 5.31]   | .079      | -                    |
| <b>Parity</b>                               |                      |           |                      |
| <b>1</b>                                    | -1.06 [-2.53, 0.42]  | .160      | -                    |
| <b>2</b>                                    | -0.61 [-3.55, 2.33]  | .682      | -                    |
| <b>3+</b>                                   | -0.96 [-4.47, 2.56]  | .593      | -                    |
| <b>IMD rank</b>                             | -0.24 [-1.11, 0.63]  | .585      | -                    |
| <b>Gestational age at birth (weeks)</b>     | -0.07 [-0.40, 0.27]  | .701      | -                    |
| <b>Birthweight (kg)</b>                     | 1.03 [-0.38, 2.44]   | .153      | -                    |
| <b>Sex: female</b>                          | -1.80 [-3.07, -0.53] | .006 **   | 0.06                 |
| <b>Corrected age at assessment (months)</b> | -0.40 [-0.95, 0.16]  | .161      | -                    |
| <b>Cognition</b>                            | 0.03 [-0.03, 0.10]   | .322      | -                    |

p<0.05 \*; p<0.01 \*\*; p<0.001 \*\*\*

Adjusted R<sup>2</sup> = 0.0612.

B = unstandardised coefficient.

Outcome variable = Child Behaviour Checklist externalising sub-score at 18 months. Maternal EPDS = maternal Edinburgh Postnatal

Depression Scale score at term-equivalent age. Multiple pregnancy = dummy variable of twin/triplet pregnancy. Parity = dummy variable, one/two/three+ previous child(ren). Corrected age at assessment (months) = age at behavioural assessment, corrected for gestational age.

Cognition = infant Bayley III score at 18 months.

Effect size (Cohen's f<sup>2</sup>, calculated from squared part correlations for predictors significant to 0.05): 0.02 = small, 0.15 = medium and 0.35 = large.<sup>1</sup>

- indicates data not given, as predictor not significant to 0.05.

**Supplementary Table 3: CBCL and Q-CHAT model predictors using complete case analysis without interaction.**

|                                             | CBCL                 |         | Q-CHAT               |           |
|---------------------------------------------|----------------------|---------|----------------------|-----------|
|                                             | B [95%CI]            | p       | B [95%CI]            | p         |
| <b>Maternal EPDS</b>                        | 0.88 [0.35, 1.41]    | .001 ** | 0.21 [-0.02, 0.44]   | .069      |
| <b>Maternal BMI</b>                         | -0.01 [-0.38, 0.37]  | .963    | 0.01 [-0.16, 0.17]   | .930      |
| <b>Multiple pregnancy</b>                   | 1.50 [-6.87, 9.87]   | .724    | 0.43 [-2.50, 3.37]   | .772      |
| <b>Parity</b>                               |                      |         |                      |           |
| <b>1</b>                                    | -2.83 [-6.60, 0.94]  | .141    | -1.54 [-3.41, 0.34]  | .108      |
| <b>2</b>                                    | -3.49 [-10.3, 3.35]  | .316    | 0.13 [-2.85, 3.10]   | .933      |
| <b>3+</b>                                   | -1.38 [-10.0, 7.30]  | .755    | -1.43 [-4.50, 1.64]  | .360      |
| <b>IMD rank</b>                             | -1.44 [-3.56, 0.67]  | .181    | -1.75 [-2.70, -0.79] | <.001 *** |
| <b>Gestational age at birth (weeks)</b>     | 0.01 [-0.90, 0.91]   | .987    | 0.10 [-0.33, 0.54]   | .639      |
| <b>Birthweight (kg)</b>                     | -0.65 [-4.38, 3.08]  | .733    | -1.81 [-3.63, 0.00]  | .050      |
| <b>Sex: female</b>                          | -4.57 [-7.82, -1.31] | .006 ** | -2.12 [-3.60, -0.64] | .005 **   |
| <b>Corrected age at assessment (months)</b> | -0.84 [-2.26, 0.59]  | .247    | -0.41 [-1.18, 0.35]  | .290      |
| <b>Cognition</b>                            | -0.03 [-0.20, 0.13]  | .689    | -0.23 [-0.30, -0.15] | <.001 *** |

p<0.05 \*; p<0.01 \*\*; p<0.001 \*\*\*

CBCL adjusted  $R^2 = 0.0862$ . Q-CHAT adjusted  $R^2 = 0.2103$ .

B = unstandardised coefficient.

CBCL = Child Behaviour Checklist externalising sub-score at 18 months. Q-CHAT = Quantitative Checklist for Autism in Toddlers score at 18 months. Maternal EPDS = maternal Edinburgh Postnatal Depression Scale score at term-equivalent age. Multiple pregnancy = dummy variable of twin/triplet pregnancy. Parity = dummy variable, one/two/three+ previous child(ren). Gestation (weeks) = dummy variable: 34-36+6 weeks and  $\geq 37$  weeks gestation at birth. Corrected age at assessment (months) = age at behavioural assessment, corrected for gestational age. Cognition = infant Bayley III score at 18 months.

**Supplementary Table 4: EPDS score predictors.**

|                           | <b>IRR [95%CI]</b> | <b>p</b> |
|---------------------------|--------------------|----------|
| <b>Time-lag (weeks)</b>   | 1.01 [0.97, 1.05]  | .647     |
| <b>Gestation:term</b>     | 0.91 [0.64, 1.31]  | .627     |
| <b>IMD rank</b>           | 1.00 [1.00, 1.00]  | .103     |
| <b>Multiple pregnancy</b> | 0.66 [0.46, 0.96]  | .031 *   |
| <b>Parity</b>             |                    |          |
| <b>1</b>                  | 0.79 [0.66, 0.95]  | .011 *   |
| <b>2</b>                  | 0.87 [0.60, 1.28]  | .491     |
| <b>3+</b>                 | 0.84 [0.54, 1.31]  | .445     |
| <b>Birthweight (kg)</b>   | 0.98 [0.83, 1.17]  | .847     |
| <b>Sex:female</b>         | 1.13 [0.98, 1.31]  | .098     |

p<0.05 \*; p<0.01 \*\*; p<0.001 \*\*\*

Pseudo R<sup>2</sup> = 0.0228

IRR = incidence rate ratio

Outcome variable = maternal Edinburgh Postnatal Depression Scale (EPDS) score at term-equivalent age. Time-lag (weeks) = time in weeks between birth and EPDS assessment. Gestation:term = dummy variable, term (≥37 weeks) vs preterm (<37 weeks) gestation at birth. Multiple pregnancy = dummy variable of twin/triplet pregnancy. Parity = dummy variable, one/two/three+ previous child(ren).

**Supplementary Table 5:** EPDS score predictors including interaction ‘term x time-lag’.

|                                | <b>IRR [95%CI]</b> | <b>p</b> |
|--------------------------------|--------------------|----------|
| <b>Time-lag (weeks)</b>        | 1.00 [0.97, 1.04]  | .823     |
| <b>Gestation: term</b>         | 0.88 [0.58, 1.34]  | .553     |
| <b>IMD rank</b>                | 1.00 [1.00, 1.00]  | .104     |
| <b>Multiple pregnancy</b>      | 0.66 [0.46, 0.96]  | .029 *   |
| <b>Parity</b>                  |                    |          |
| <b>1</b>                       | 0.79 [0.66, 0.95]  | .010 *   |
| <b>2</b>                       | 0.87 [0.60, 1.28]  | .480     |
| <b>3+</b>                      | 0.85 [0.55, 1.31]  | .458     |
| <b>Birthweight (kg)</b>        | 0.97 [0.83, 1.15]  | .756     |
| <b>Sex:female</b>              | 1.13 [0.98, 1.30]  | .100     |
| <b>Term x time-lag (weeks)</b> | 1.01 [0.94, 1.10]  | .735     |

p<0.05 \*; p<0.01 \*\*; p<0.001 \*\*\*

Pseudo R<sup>2</sup> = 0.0230

IRR = incidence rate ratio

Outcome variable = maternal Edinburgh Postnatal Depression Scale (EPDS) score at term-equivalent age. Time-lag (weeks) = time in weeks between birth and EPDS assessment. Gestation: term = dummy variable, term (≥37 weeks) vs preterm (<37 weeks) gestation at birth. Multiple pregnancy = dummy variable of twin/triplet pregnancy. Parity = dummy variable, one/two/three+ previous child(ren). Term x time-lag (weeks): interaction term between term gestation at birth and time-lag between birth and maternal EPDS assessment.



Supplementary Figure 1: Histogram showing the distribution of maternal EPDS scores at term-equivalent age.

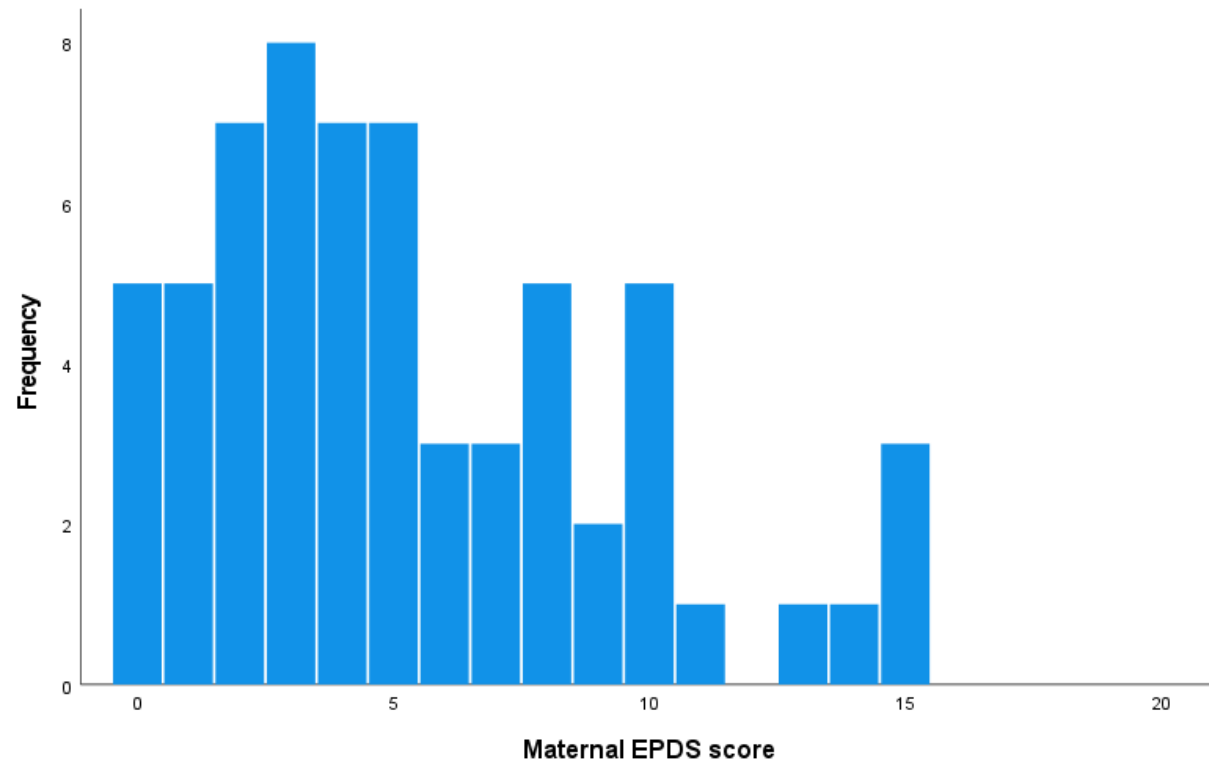

1  
2  
3 **Supplemental reference list**  
4

- 5 1. Cohen J. *Statistical Power Analysis for the Behavioral Sciences*. 2nd ed. L. Erlbaum Associates; 1988.  
6  
7  
8  
9  
10  
11  
12  
13  
14  
15  
16  
17  
18  
19  
20  
21  
22  
23  
24  
25  
26  
27  
28  
29  
30  
31  
32  
33  
34  
35  
36  
37  
38  
39  
40  
41  
42  
43  
44  
45  
46

For peer review only

STROBE Statement—Checklist of items that should be included in reports of *cohort studies*

|                              | Item No | Recommendation                                                                                                                                                                                                                                                                                                         | Page No   |
|------------------------------|---------|------------------------------------------------------------------------------------------------------------------------------------------------------------------------------------------------------------------------------------------------------------------------------------------------------------------------|-----------|
| <b>Title and abstract</b>    | 1       | (a) Indicate the study's design with a commonly used term in the title or the abstract<br>(b) Provide in the abstract an informative and balanced summary of what was done and what was found                                                                                                                          | 1, 2      |
| <b>Introduction</b>          |         |                                                                                                                                                                                                                                                                                                                        |           |
| Background/rationale         | 2       | Explain the scientific background and rationale for the investigation being reported                                                                                                                                                                                                                                   | 5, 6      |
| Objectives                   | 3       | State specific objectives, including any prespecified hypotheses                                                                                                                                                                                                                                                       | 6         |
| <b>Methods</b>               |         |                                                                                                                                                                                                                                                                                                                        |           |
| Study design                 | 4       | Present key elements of study design early in the paper                                                                                                                                                                                                                                                                | 6, 7      |
| Setting                      | 5       | Describe the setting, locations, and relevant dates, including periods of recruitment, exposure, follow-up, and data collection                                                                                                                                                                                        | 7         |
| Participants                 | 6       | (a) Give the eligibility criteria, and the sources and methods of selection of participants. Describe methods of follow-up<br>(b) For matched studies, give matching criteria and number of exposed and unexposed                                                                                                      | 7         |
| Variables                    | 7       | Clearly define all outcomes, exposures, predictors, potential confounders, and effect modifiers. Give diagnostic criteria, if applicable                                                                                                                                                                               | 7, 8      |
| Data sources/<br>measurement | 8*      | For each variable of interest, give sources of data and details of methods of assessment (measurement). Describe comparability of assessment methods if there is more than one group                                                                                                                                   | 7, 8      |
| Bias                         | 9       | Describe any efforts to address potential sources of bias                                                                                                                                                                                                                                                              | 9         |
| Study size                   | 10      | Explain how the study size was arrived at                                                                                                                                                                                                                                                                              | 7         |
| Quantitative variables       | 11      | Explain how quantitative variables were handled in the analyses. If applicable, describe which groupings were chosen and why                                                                                                                                                                                           | 9, 10     |
| Statistical methods          | 12      | (a) Describe all statistical methods, including those used to control for confounding<br>(b) Describe any methods used to examine subgroups and interactions<br>(c) Explain how missing data were addressed<br>(d) If applicable, explain how loss to follow-up was addressed<br>(e) Describe any sensitivity analyses | 9, 10, 11 |
| <b>Results</b>               |         |                                                                                                                                                                                                                                                                                                                        |           |
| Participants                 | 13*     | (a) Report numbers of individuals at each stage of study—eg numbers potentially eligible, examined for eligibility, confirmed eligible, included in the study, completing follow-up, and analysed<br>(b) Give reasons for non-participation at each stage<br>(c) Consider use of a flow diagram                        | 7, 11     |
| Descriptive data             | 14*     | (a) Give characteristics of study participants (eg demographic, clinical, social) and information on exposures and potential confounders<br>(b) Indicate number of participants with missing data for each variable of interest<br>(c) Summarise follow-up time (eg, average and total amount)                         | 9, 11     |
| Outcome data                 | 15*     | Report numbers of outcome events or summary measures over time                                                                                                                                                                                                                                                         | 11        |

|    |                          |    |                                                                                                                                                                                                              |                  |
|----|--------------------------|----|--------------------------------------------------------------------------------------------------------------------------------------------------------------------------------------------------------------|------------------|
| 1  | Main results             | 16 | (a) Give unadjusted estimates and, if applicable, confounder-adjusted estimates and their precision (eg, 95% confidence interval). Make clear which confounders were adjusted for and why they were included | 11,<br>12        |
| 2  |                          |    | (b) Report category boundaries when continuous variables were categorized                                                                                                                                    |                  |
| 3  |                          |    | (c) If relevant, consider translating estimates of relative risk into absolute risk for a meaningful time period                                                                                             |                  |
| 4  |                          |    |                                                                                                                                                                                                              |                  |
| 5  |                          |    |                                                                                                                                                                                                              |                  |
| 6  |                          |    |                                                                                                                                                                                                              |                  |
| 7  |                          |    |                                                                                                                                                                                                              |                  |
| 8  |                          |    |                                                                                                                                                                                                              |                  |
| 9  | Other analyses           | 17 | Report other analyses done—eg analyses of subgroups and interactions, and sensitivity analyses                                                                                                               | 11,<br>12        |
| 10 |                          |    |                                                                                                                                                                                                              |                  |
| 11 | <b>Discussion</b>        |    |                                                                                                                                                                                                              |                  |
| 12 |                          |    |                                                                                                                                                                                                              |                  |
| 13 | Key results              | 18 | Summarise key results with reference to study objectives                                                                                                                                                     | 12               |
| 14 | Limitations              | 19 | Discuss limitations of the study, taking into account sources of potential bias or imprecision. Discuss both direction and magnitude of any potential bias                                                   | 15,<br>16,<br>17 |
| 15 |                          |    |                                                                                                                                                                                                              |                  |
| 16 |                          |    |                                                                                                                                                                                                              |                  |
| 17 | Interpretation           | 20 | Give a cautious overall interpretation of results considering objectives, limitations, multiplicity of analyses, results from similar studies, and other relevant evidence                                   | 13,<br>14,<br>17 |
| 18 |                          |    |                                                                                                                                                                                                              |                  |
| 19 |                          |    |                                                                                                                                                                                                              |                  |
| 20 | Generalisability         | 21 | Discuss the generalisability (external validity) of the study results                                                                                                                                        | 13,<br>14        |
| 21 |                          |    |                                                                                                                                                                                                              |                  |
| 22 | <b>Other information</b> |    |                                                                                                                                                                                                              |                  |
| 23 |                          |    |                                                                                                                                                                                                              |                  |
| 24 | Funding                  | 22 | Give the source of funding and the role of the funders for the present study and, if applicable, for the original study on which the present article is based                                                | 3                |
| 25 |                          |    |                                                                                                                                                                                                              |                  |

\*Give information separately for exposed and unexposed groups.

**Note:** An Explanation and Elaboration article discusses each checklist item and gives methodological background and published examples of transparent reporting. The STROBE checklist is best used in conjunction with this article (freely available on the Web sites of PLoS Medicine at <http://www.plosmedicine.org/>, Annals of Internal Medicine at <http://www.annals.org/>, and Epidemiology at <http://www.epidem.com/>). Information on the STROBE Initiative is available at <http://www.strobe-statement.org>.
