# Supplementary material for: Postnatal maternal depressive symptoms and behavioural outcomes in term-born and preterm-born toddlers: a longitudinal UK community cohort study
Source: PubMed Central journal article supplement (PMC9438072; doi:10.1136/bmjopen-2021-058540), 2022-09-01
Supplement: bmjopen-2021-058540supp001.pdf [file bmjopen-2021-058540supp001.pdf]

## **Supplemental material**

**Supplementary Table 1:** CBCL internalising symptom model predictors using multiple imputation.

**Supplementary Table 2:** CBCL externalising symptom model predictors using multiple imputation.

**Supplementary Table 3:** CBCL and Q-CHAT model predictors using complete case analysis without interaction.

**Supplementary Table 4:** EPDS score predictors.

**Supplementary Table 5:** EPDS score predictors including interaction ‘term x time-lag’.

**Supplementary Figure 1:** Histogram showing the distribution of maternal EPDS scores at term-equivalent age.

**Supplementary Table 1:** CBCL internalising symptom model predictors using multiple imputation.

|                                             | <b>B [95% CI]</b>    | <b>p</b> | <b>f<sup>2</sup></b> |
|---------------------------------------------|----------------------|----------|----------------------|
| <b>Maternal EPDS</b>                        | 0.22 [0.08, 0.36]    | .003 **  | 0.03                 |
| <b>Maternal BMI</b>                         | -0.04 [-0.13, 0.06]  | .436     | -                    |
| <b>Multiple pregnancy</b>                   | 0.58 [-1.10, 2.27]   | .497     | -                    |
| <b>Parity</b>                               |                      |          |                      |
| <b>1</b>                                    | -0.37 [-1.41, 0.67]  | .487     | -                    |
| <b>2</b>                                    | -1.33 [-3.09, 0.42]  | .136     | -                    |
| <b>3+</b>                                   | 0.64 [-1.34, 2.62]   | .524     | -                    |
| <b>IMD rank</b>                             | -0.41 [-0.91, 0.10]  | .115     | -                    |
| <b>Gestational age at birth (weeks)</b>     | 0.22 [-0.00, 0.44]   | .053     | -                    |
| <b>Birthweight (kg)</b>                     | -0.97 [-1.90, -0.05] | .038 *   | 0.005                |
| <b>Sex: female</b>                          | -0.51 [-1.35, 0.33]  | .232     | -                    |
| <b>Corrected age at assessment (months)</b> | 0.02 [-0.41, 0.45]   | .923     | -                    |
| <b>Cognition</b>                            | -0.05 [-0.10, -0.01] | .016 *   | 0.01                 |

p<0.05 \*, p<0.01 \*\*, p<0.001 \*\*\*

Adjusted R<sup>2</sup> = 0.0566.

B = unstandardised coefficient.

Outcome variable = Child Behaviour Checklist internalising sub-score at 18 months. Maternal EPDS = maternal Edinburgh Postnatal Depression Scale score at term-equivalent age. Multiple pregnancy = dummy variable of twin/triplet pregnancy. Parity = dummy variable, one/two/three+ previous child(ren). Corrected age at assessment (months) = age at behavioural assessment, corrected for gestational age. Cognition = infant Bayley III score at 18 months.

Effect size (Cohen's f<sup>2</sup>, calculated from squared part correlations for predictors significant to 0.05): 0.02 = small, 0.15 = medium and 0.35 = large.<sup>1</sup>

- indicates data not given, as predictor not significant to 0.05.

**Supplementary Table 2:** CBCL externalising symptom model predictors using multiple imputation.

|                                             | <b>B [95% CI]</b>    | <b>p</b>  | <b>f<sup>2</sup></b> |
|---------------------------------------------|----------------------|-----------|----------------------|
| <b>Maternal EPDS</b>                        | 0.40 [0.20, 0.61]    | <.001 *** | 0.05                 |
| <b>Maternal BMI</b>                         | 0.01 [-0.17, 0.15]   | .933      | -                    |
| <b>Multiple pregnancy</b>                   | 2.51 [-0.29, 5.31]   | .079      | -                    |
| <b>Parity</b>                               |                      |           |                      |
| <b>1</b>                                    | -1.06 [-2.53, 0.42]  | .160      | -                    |
| <b>2</b>                                    | -0.61 [-3.55, 2.33]  | .682      | -                    |
| <b>3+</b>                                   | -0.96 [-4.47, 2.56]  | .593      | -                    |
| <b>IMD rank</b>                             | -0.24 [-1.11, 0.63]  | .585      | -                    |
| <b>Gestational age at birth (weeks)</b>     | -0.07 [-0.40, 0.27]  | .701      | -                    |
| <b>Birthweight (kg)</b>                     | 1.03 [-0.38, 2.44]   | .153      | -                    |
| <b>Sex: female</b>                          | -1.80 [-3.07, -0.53] | .006 **   | 0.06                 |
| <b>Corrected age at assessment (months)</b> | -0.40 [-0.95, 0.16]  | .161      | -                    |
| <b>Cognition</b>                            | 0.03 [-0.03, 0.10]   | .322      | -                    |

p<0.05 \*, p<0.01 \*\*, p<0.001 \*\*\*

Adjusted R<sup>2</sup> = 0.0612.

B = unstandardised coefficient.

Outcome variable = Child Behaviour Checklist externalising sub-score at 18 months. Maternal EPDS = maternal Edinburgh Postnatal Depression Scale score at term-equivalent age. Multiple pregnancy = dummy variable of twin/triplet pregnancy. Parity = dummy variable, one/two/three+ previous child(ren). Corrected age at assessment (months) = age at behavioural assessment, corrected for gestational age. Cognition = infant Bayley III score at 18 months.

Effect size (Cohen's f<sup>2</sup>, calculated from squared part correlations for predictors significant to 0.05): 0.02 = small, 0.15 = medium and 0.35 = large.<sup>1</sup>

- indicates data not given, as predictor not significant to 0.05.

**Supplementary Table 3:** CBCL and Q-CHAT model predictors using complete case analysis without interaction.

|                                             | CBCL                 |         | Q-CHAT               |           |
|---------------------------------------------|----------------------|---------|----------------------|-----------|
|                                             | B [95% CI]           | p       | B [95% CI]           | p         |
| <b>Maternal EPDS</b>                        | 0.88 [0.35, 1.41]    | .001 ** | 0.21 [-0.02, 0.44]   | .069      |
| <b>Maternal BMI</b>                         | -0.01 [-0.38, 0.37]  | .963    | 0.01 [-0.16, 0.17]   | .930      |
| <b>Multiple pregnancy</b>                   | 1.50 [-6.87, 9.87]   | .724    | 0.43 [-2.50, 3.37]   | .772      |
| <b>Parity</b>                               |                      |         |                      |           |
| <b>1</b>                                    | -2.83 [-6.60, 0.94]  | .141    | -1.54 [-3.41, 0.34]  | .108      |
| <b>2</b>                                    | -3.49 [-10.3, 3.35]  | .316    | 0.13 [-2.85, 3.10]   | .933      |
| <b>3+</b>                                   | -1.38 [-10.0, 7.30]  | .755    | -1.43 [-4.50, 1.64]  | .360      |
| <b>IMD rank</b>                             | -1.44 [-3.56, 0.67]  | .181    | -1.75 [-2.70, -0.79] | <.001 *** |
| <b>Gestational age at birth (weeks)</b>     | 0.01 [-0.90, 0.91]   | .987    | 0.10 [-0.33, 0.54]   | .639      |
| <b>Birthweight (kg)</b>                     | -0.65 [-4.38, 3.08]  | .733    | -1.81 [-3.63, 0.00]  | .050      |
| <b>Sex: female</b>                          | -4.57 [-7.82, -1.31] | .006 ** | -2.12 [-3.60, -0.64] | .005 **   |
| <b>Corrected age at assessment (months)</b> | -0.84 [-2.26, 0.59]  | .247    | -0.41 [-1.18, 0.35]  | .290      |
| <b>Cognition</b>                            | -0.03 [-0.20, 0.13]  | .689    | -0.23 [-0.30, -0.15] | <.001 *** |

p<0.05 \*; p<0.01 \*\*; p<0.001 \*\*\*

CBCL adjusted R<sup>2</sup> = 0.0862. Q-CHAT adjusted R<sup>2</sup> = 0.2103.

B = unstandardised coefficient.

CBCL = Child Behaviour Checklist externalising sub-score at 18 months. Q-CHAT = Quantitative Checklist for Autism in Toddlers score at 18 months. Maternal EPDS = maternal Edinburgh Postnatal Depression Scale score at term-equivalent age. Multiple pregnancy = dummy variable of twin/triplet pregnancy. Parity = dummy variable, one/two/three+ previous child(ren). Gestation (weeks) = dummy variable: 34-36+6 weeks and ≥37 weeks gestation at birth. Corrected age at assessment (months) = age at behavioural assessment, corrected for gestational age. Cognition = infant Bayley III score at 18 months.

**Supplementary Table 4:** EPDS score predictors.

|                           | <b>IRR [95% CI]</b> | <b>p</b> |
|---------------------------|---------------------|----------|
| <b>Time-lag (weeks)</b>   | 1.01 [0.97, 1.05]   | .647     |
| <b>Gestation:term</b>     | 0.91 [0.64, 1.31]   | .627     |
| <b>IMD rank</b>           | 1.00 [1.00, 1.00]   | .103     |
| <b>Multiple pregnancy</b> | 0.66 [0.46, 0.96]   | .031 *   |
| <b>Parity</b>             |                     |          |
| <b>1</b>                  | 0.79 [0.66, 0.95]   | .011 *   |
| <b>2</b>                  | 0.87 [0.60, 1.28]   | .491     |
| <b>3+</b>                 | 0.84 [0.54, 1.31]   | .445     |
| <b>Birthweight (kg)</b>   | 0.98 [0.83, 1.17]   | .847     |
| <b>Sex:female</b>         | 1.13 [0.98, 1.31]   | .098     |

p<0.05 \*; p<0.01 \*\*; p<0.001 \*\*\*

Pseudo R<sup>2</sup> = 0.0228

IRR = incidence rate ratio

Outcome variable = maternal Edinburgh Postnatal Depression Scale (EPDS) score at term-equivalent age. Time-lag (weeks) = time in weeks between birth and EPDS assessment. Gestation:term = dummy variable, term (≥37 weeks) vs preterm (<37 weeks) gestation at birth. Multiple pregnancy = dummy variable of twin/triplet pregnancy. Parity = dummy variable, one/two/three+ previous child(ren).

**Supplementary Table 5:** EPDS score predictors including interaction ‘term x time-lag’.

|                                | <b>IRR [95% CI]</b> | <b>p</b> |
|--------------------------------|---------------------|----------|
| <b>Time-lag (weeks)</b>        | 1.00 [0.97, 1.04]   | .823     |
| <b>Gestation: term</b>         | 0.88 [0.58, 1.34]   | .553     |
| <b>IMD rank</b>                | 1.00 [1.00, 1.00]   | .104     |
| <b>Multiple pregnancy</b>      | 0.66 [0.46, 0.96]   | .029 *   |
| <b>Parity</b>                  |                     |          |
| <b>1</b>                       | 0.79 [0.66, 0.95]   | .010 *   |
| <b>2</b>                       | 0.87 [0.60, 1.28]   | .480     |
| <b>3+</b>                      | 0.85 [0.55, 1.31]   | .458     |
| <b>Birthweight (kg)</b>        | 0.97 [0.83, 1.15]   | .756     |
| <b>Sex:female</b>              | 1.13 [0.98, 1.30]   | .100     |
| <b>Term x time-lag (weeks)</b> | 1.01 [0.94, 1.10]   | .735     |

p<0.05 \*; p<0.01 \*\*; p<0.001 \*\*\*

Pseudo R<sup>2</sup> = 0.0230

IRR = incidence rate ratio

Outcome variable = maternal Edinburgh Postnatal Depression Scale (EPDS) score at term-equivalent age. Time-lag (weeks) = time in weeks between birth and EPDS assessment. Gestation: term = dummy variable, term (≥37 weeks) vs preterm (<37 weeks) gestation at birth. Multiple pregnancy = dummy variable of twin/triplet pregnancy. Parity = dummy variable, one/two/three+ previous child(ren). Term x time-lag (weeks): interaction term between term gestation at birth and time-lag between birth and maternal EPDS assessment.

**Supplementary Figure 1:** Histogram showing the distribution of maternal EPDS scores at term-equivalent age.

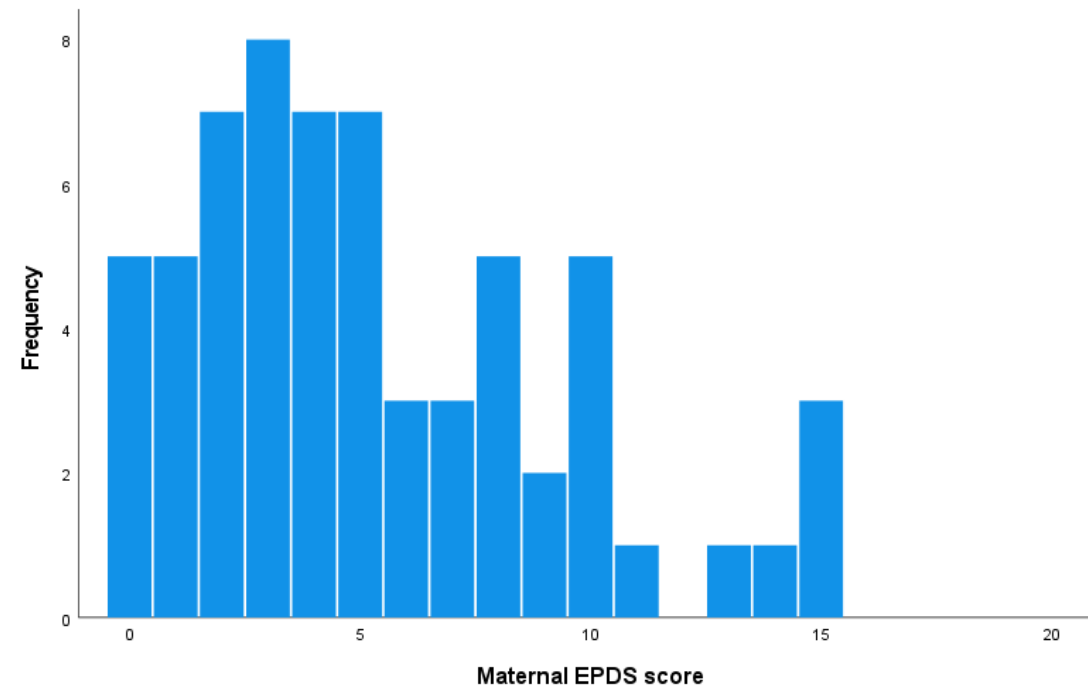

**Supplemental reference list**

1. Cohen J. *Statistical Power Analysis for the Behavioral Sciences*. 2nd ed. L. Erlbaum Associates; 1988.
